# Supplementary material for: Iron salt-promoted oxidation of steroidal phenols by m-chloroperbenzoic acid: a route to possible antitumor agents
Source: Royal Society of Chemistry journal article supplement (doi:10.1039/d2ra03717c), 2022-01-01
Supplement: d2ra03717c1.pdf [file d2ra03717c1.pdf]

## Supplementary material

for

### Iron salts promoted oxidation of steroidal phenols by *m*-chloroperbenzoic acid: route to possible antitumor agents

Tatjana J. Kop,<sup>a</sup> Nataša Terzić-Jovanović,<sup>a</sup> Željko Žižak,<sup>b</sup> Bogdan A. Šolaja<sup>c, d</sup> and Dragana R. Milić<sup>d</sup>

<sup>a</sup> University of Belgrade - Institute of Chemistry, Technology and Metallurgy, National Institute of Republic of Serbia, Njegoševa 12, 11000 Belgrade, Serbia.

<sup>b</sup> University of Belgrade - Institute for Oncology and Radiology of Serbia, Pasterova 14, 11000 Belgrade, Serbia.

<sup>c</sup> University of Belgrade - Faculty of Chemistry, Studentski trg 12-16, 11158 Belgrade, Serbia.

<sup>d</sup> Serbian Academy of Sciences and Arts, KnezMihailova 35, Belgrade, Serbia

#### Contents:

|                                                                                                        |    |
|--------------------------------------------------------------------------------------------------------|----|
| <b>1. Experimental</b>                                                                                 | 1  |
| <b>2. Table S1:</b> Antineoplastic activity of newly synthesized derivatives                           | 7  |
| <b>3. NMR spectra</b> of synthesized derivatives:                                                      |    |
| 3.1. <sup>1</sup> H NMR, <sup>13</sup> C NMR, COSY, HSQC, HMBC and NOESY spectra of compound <b>2b</b> | 8  |
| 3.2. <sup>1</sup> H NMR, <sup>13</sup> C NMR, COSY, HSQC and HMBC spectra of compound <b>2d</b>        | 15 |
| 3.3. <sup>1</sup> H NMR, <sup>13</sup> C NMR, COSY, HSQC and HMBC spectra of compound <b>2e</b>        | 21 |
| 3.4. <sup>1</sup> H NMR, <sup>13</sup> C NMR, COSY, HSQC, HMBC and NOESY spectra of compound <b>2f</b> | 27 |
| 3.5. <sup>1</sup> H NMR and <sup>13</sup> C NMR spectra of compound <b>3b</b>                          | 34 |
| 3.6. <sup>1</sup> H NMR, <sup>13</sup> C NMR, COSY, HSQC, HMBC and NOESY spectra of compound <b>3d</b> | 36 |
| 3.7. <sup>1</sup> H NMR and <sup>13</sup> C NMR spectra of compound <b>3e</b>                          | 43 |
| 3.8. <sup>1</sup> H NMR, <sup>13</sup> C NMR, COSY, HSQC, HMBC and NOESY spectra of compound <b>3f</b> | 45 |
| 3.9. <sup>1</sup> H NMR, <sup>13</sup> C NMR, COSY, HSQC and HMBC spectra of compound <b>4c</b>        | 52 |
| 3.10. <sup>1</sup> H NMR and <sup>13</sup> C NMR spectra of compound <b>4d</b>                         | 58 |
| 3.11. <sup>1</sup> H NMR, <sup>13</sup> C NMR, COSY, HSQC and HMBC spectra of compound <b>5</b>        | 60 |
| 3.12. <sup>1</sup> H NMR and DEPT spectra of compound <b>6</b>                                         | 66 |

## 1. Experimental Section

### General:

*Antiproliferative activity testing towards HeLa, Fem-x and K562 cells* was done according to previously described protocol.<sup>1</sup> Stock solutions of tested compounds (10 mM in DMSO) were diluted to various final concentrations by nutrient medium. Amount of survived cells (HeLa (cervix carcinoma), Fem-x (melanoma) and K562 (myelogenous leukemia)) was measured in standard 72 h MTT test. Antiproliferative activities were represented as a concentrations of investigated compounds inducing 50% decrease in cell survival (IC<sub>50</sub>). Experiments were done in triplicates. The HeLa and K562 cell lines was procured from ATCC. The Fem-X cell line was a kind gift from Dr Nikola Vujanovic (University of Pittsburgh).

*EPR spectroscopy:* the EPR spectra with DEPMPO as a spin trapper were recorded on a Varian E-109 spectrometer. The EPR instrumental settings for experiment were as following: H = 3140 G (center field), microwave frequency = 9.51 GHz, modulation frequency = 100 kHz, field sweep = 200 G, modulation amplitude = 2 G, receiver gain  $2 \times 10^4$ , microwave power = 10 mW, time constant = 32 ms, sweep time = 2 min. WINEPR SimFonia, v 1.25, was used for the simulation of DEPMPO generated EPR spectra. During the experiment, mixture of estrone (2 mM), DEPMPO (112.5 mM), Fe(II) salt (2mM, FeSO<sub>4</sub> or FeCl<sub>2</sub>) and MCPBA (6 mM) in acetonitrile (0.5 mL) was subjected to above mentioned conditions and signal was detected between 3 and 5 minutes.

*Synthesis:* melting points were determined on a Boetius PMHK 05 apparatus and were not corrected. IR spectra were recorded on Perkin-Elmer FT-IR 1725X spectrophotometer. UV spectra were recorded on a Beckman DU-50 and Cintra 40 spectrophotometers. <sup>1</sup>H NMR and <sup>13</sup>C NMR spectra were recorded on Varian Gemini-200 (at 200 and 50 MHz, respectively), Bruker AM-250 (at 250 and 62.9 MHz, respectively) and Bruker Avance (at 500 and 125 MHz, respectively) spectrometers in the indicated solvent, using TMS as internal standard. Chemical shifts ( $\delta$ ) are expressed in ppm values and coupling constants ( $J$ ) in Hz. Mass spectra were taken on a Finnigan-MAT 8230 and HRMS spectra were recorded on Agilent Technologies 1200 Series. Elemental analysis was done on Elementar, Vario EL III. Estrone (**1a**) and estradiol (**1b**) are purchased from Merck. Monoesters **1c** and **1d** were synthesized from diesters by selective hydrolysis. Estrone was alkylated with corresponding organometallic compounds (benzylmagnesium chloride and butyllithium, respectively) to give substrates **1e**<sup>2</sup> and **1f**.<sup>3</sup>

**General procedure 1:** Oxidation of steroidal phenols with MCPBA/FeSO<sub>4</sub> system (**1** → **2** + **3**).

To a suspension of steroidal phenol **1** (1.00 mmol) and FeSO<sub>4</sub>·7H<sub>2</sub>O (278.5 mg, 1.00 mmol, 1 eq) in refluxing acetone (20-40 mL) MCPBA (80%, 3×215.0 mg, 3×1.00 mmol, 3 eq) was added portionwise, every 30 minutes. Reaction mixture was additionally refluxed until consumption of the substrate (monitored by TLC using PhMe/EtOAc 7:3). Acetone was evaporated under reduced pressure and the residue resuspended in DCM (80 mL). Solid Na<sub>2</sub>CO<sub>3</sub> (50 mg) and Na<sub>2</sub>S<sub>2</sub>O<sub>3</sub> (50 mg) were added to the suspension and stirred for 10 minutes at room temperature. After filtration and evaporation to dryness the crude mixture was purified by dry-flash chromatography on silica.

### **1a** → **2a** + **3a**

Estrone (**1a**, 500.0 mg, 1.86 mmol), FeSO<sub>4</sub>·7H<sub>2</sub>O (518 mg, 1.86 mmol) and MCPBA (3×400.0 mg, 3×1.86 mmol) in acetone (35 mL) were refluxed for 4 h after addition of MCPBA. Elution with PhMe/EtOAc 9:1, 7:3 and 1:1 afforded unreacted estrone **1a** (29.9 mg, 5%), and compounds **3a** (264 mg, 47%) and **2a** (264 mg, 43%), respectively. Their spectroscopic data were in accordance with literature.<sup>4</sup>

### **1b** → **2b** + **3b**

Estradiol (**1b**, 390 mg, 1.432 mmol), FeSO<sub>4</sub>·7H<sub>2</sub>O (400 mg, 1.43 mmol) and MCPBA (3×309 mg, 3×1.43 mmol) in acetone (40 mL) were refluxed for 4 h after addition of MCPBA. Elution with PhMe/EtOAc 8:2, 7:3 and 1:1 afforded unreacted estradiol (**1b**, 88 mg, 23%) and compounds **3b** (91.4 mg, 21% (27% relative to consumed substrate)) and **2b** (198 mg, 48% (62% relative to consumed substrate)), respectively. Spectroscopic data of quinol **2b** were in accordance with literature.<sup>5</sup>

**1c → 2c + 3c**

Estradiol 17 $\beta$ -acetate (**1c**, 1,00 g, 3.04 mol), FeSO<sub>4</sub>·7H<sub>2</sub>O (847 mg, 3.04 mmol) and MCPBA (3×655 mg, 3×3.04 mmol) in acetone (60 mL) were refluxed for 4 h after addition of MCPBA. Elution with PhMe/EtOAc 9:1 afforded unreacted **1c** (110 mg, 11%), while elution with PhMe/EtOAc 8:2 and 7:3 afforded compounds **3c** (350 mg, 32%) and **2c** (320 mg, 29%), respectively. Their spectroscopic data were in accordance with literature.<sup>4</sup>

**1d → 2d + 3d**

Estradiol 17 $\beta$ -propionate (**1d**, 100 mg, 0.29 mmol), FeSO<sub>4</sub>·7H<sub>2</sub>O (80 mg, 0.29 mmol) and MCPBA (3×63 mg, 3×0.29 mmol) in acetone (10 mL) were refluxed for 6 h after addition of MCPBA. Elution with PhMe/EtOAc 9:1 afforded unreacted **1d** (8 mg, 8%), while elution with PhMe/EtOAc 7:3 and 1:1 afforded compounds **3d** (36 mg, 33%) and **2d** (25 mg, 24%), respectively.

**1e → 2e + 3e**

17 $\alpha$ -benzylestradiol (**1e**, 360 mg, 0.99 mmol), FeSO<sub>4</sub>·7H<sub>2</sub>O (280 mg, 0.99 mmol) and MCPBA (3×215 mg, 3×0.99 mmol) in acetone (35 mL) were refluxed for 4.5 h after addition of MCPBA. Elution with DCM/acetone 9:1 afforded unreacted **1e** (45 mg, 13%), while elution with DCM/acetone 8:2 and 7:3 afforded compounds **3e** (55 mg, 14%) and **2e** (113 mg, 30%), respectively.

**1f → 2f + 3f**

17 $\alpha$ -butylestradiol (**1f**, 480 mg, 1.46 mmol), FeSO<sub>4</sub>·7H<sub>2</sub>O (400 mg, 1.46 mmol) and MCPBA (4×315 mg, 4×1.46 mmol) in acetone (65 mL) were refluxed for 4 h after addition of MCPBA. Elution with PhMe/EtOAc 9:1 afforded unreacted **1f** (67 mg, 14%), while elution with PhMe/EtOAc 7:3 and 1:1 afforded compounds **3f** (132 mg, 25%) and **2f** (106 mg, 21%), respectively.

**10 $\beta$ -hydroxyestra-1,4-dien-3,17-dione (2a):** <sup>1</sup>H NMR (200 MHz, CDCl<sub>3</sub>): 7.13 (d, *J*=10.4 Hz, H-C(1)), 6.07 (dd, *J*=10.4 Hz, *J*=2.4 Hz, H-C(2)), 5.92 (t, *J*=2.4 Hz, 1.2 Hz, H-C(4)), 0.97 (s, H<sub>3</sub>C-C(13)) ppm. <sup>13</sup>C NMR (50 MHz, CDCl<sub>3</sub>): 220.33, 185.53, 165.09, 150.25, 128.30, 123.09, 70.10, 54.18, 50.10, 47.75, 35.62, 34.58, 32.19, 31.80, 31.03, 22.00, 21.90, 13.73 ppm.

**10 $\beta$ ,17 $\beta$ -dihydroxy-1,4-estradien-3-one (2b):** <sup>1</sup>H NMR (500 MHz, CD<sub>3</sub>OD): 7.22 (d, *J*=10.0 Hz, H-C(1)), 6.12 (dd, *J*=10.0 Hz, *J*=2.0 Hz, H-C(2)), 5.96 (dd(<sup>irr</sup>t), *J*=2.0; 1.0 Hz, H-C(4)), 3.56 (t, *J*=8.5 Hz, H-C(17)), 2.77 (dddd(<sup>irr</sup>tdd), *J*=13.5; 12.5; 5.0; 1.0 Hz, H $\beta$ -C(6)), 2.33 (ddd, *J*=12.5; 4.0; 2.0 Hz, H $\alpha$ -C(6)), 2.01 (dddd(qd), *J*=13.5; 13.5; 13.5; 4.0, H $\beta$ -C(11)), 2.01-1.88 (m, H $\beta$ -C(7)), overlapped with multiplets from H $\beta$ -C(8) and H $\alpha$ -C(16)), 2.00-1.96 (m, H $\beta$ -C(8)), 2.00-1.94 (m, H $\alpha$ -C(16)), 1.87 (ddd, *J*=12.5; 4.0; 2.5 Hz, H $\beta$ -C(12)), 1.70 (dddd(dtd), *J*=13.5; 4.5; 4.5; 2.5 Hz, H $\alpha$ -C(11)), 1.61 (dddd, *J*=12.5; 11.0; 7.0; 3.0 Hz, H $\alpha$ -C(15)), 1.48 (dddd, *J*=13.5; 12.0; 8.5; 3.0 Hz, H $\beta$ -C(16)), 1.34 (dddd(qd), *J*=12.0; 12.0; 12.0; 6.0 Hz, H $\beta$ -C(15)), 1.08 (ddd(td), *J*=13.0; 13.0; 4.5 Hz, H $\alpha$ -C(12)), 1.04 (dddd, *J*=13.5; 12.5; 5.0; 1.0 Hz, H $\alpha$ -C(7)), 1.04 (ddd(td), *J*=13.0; 13.0; 5.0 Hz, H $\alpha$ -C(9)), 0.97 (ddd(td), *J*=11.5; 11.5; 7.0 Hz, H $\alpha$ -C(14)), 0.83 (s, H<sub>3</sub>C(18)) ppm. <sup>13</sup>C NMR (125 MHz, CD<sub>3</sub>OD): 187.55 (C(3)), 169.82 (C(5)), 154.41 (C(1)), 127.03 (C(2)), 122.08 (C(4)), 81.53 (C(17)), 70.43 (C(10)), 56.15 (C(9)), 50.45 (C(14)), 43.61 (C(13)), 36.91 (C(12)), 35.66 (C(8)), 34.01 (C(7)), 32.50 (C(6)), 29.87 (C(16)), 23.88 (C(15)), 23.04 (C(11)), 10.84 (C(18)) ppm.

**17 $\beta$ -acetoxy-10 $\beta$ -hydroxyestra-1,4-dien-3-one (2c):** <sup>1</sup>H NMR (250 MHz, CDCl<sub>3</sub>): 7.07 (d, *J*=10.2 Hz, H-C(1)), 6.10 (dd, *J*=10.2 Hz, *J*=2.0 Hz, H-C(2)), 5.95 (d, *J*=2.0 Hz, H-C(4)), 4.55 (dd, *J*=9.05; 7.5 Hz, H-C(17)), 2.04 (s, H<sub>3</sub>C<sup>Ac</sup>), 0.89 (s, H<sub>3</sub>C(18)) ppm. <sup>13</sup>C NMR (62.9 MHz, CDCl<sub>3</sub>): 185.84, 171.26, 165.90, 150.97, 128.05, 122.89, 82.48, 70.22, 54.28, 49.64, 42.80, 36.44, 34.83, 33.07, 32.07, 27.46, 23.82, 22.30, 21.21, 12.05 ppm.

**10 $\beta$ -hydroxy-17 $\beta$ -propionyloxy-1,4-dien-3-one (2d):** mp: 189-192 °C (colourless needles, *n*-heptane/DCM). IR(KBr): 3463, 2942, 1734, 1667, 1626, 1191, 1122, 1084, 891, 783 cm<sup>-1</sup>.  $\lambda_{\text{max}}^{\text{MeOH}}$

=239 nm (12000). <sup>1</sup>H NMR (500 MHz, CDCl<sub>3</sub>): 7.08 (d, *J*<sub>1,2</sub>=10.0 Hz, H-C(1)), 6.10 (dd, *J*<sub>1,2</sub>=10.0; *J*<sub>2,4</sub>=2.0 Hz, H-C(2)), 5.92 (dd(<sup>irr</sup>t), *J*<sub>2,4</sub>=2.0; 1.0 Hz, H-C(4)), 4.58 (dd, *J*=9.0; 8.0 Hz, H<sub>α</sub>-C(17)), 2.76 (dddd(tdd), *J*=12.5; 12.5; 4.5; 2.0 Hz), 3.01 (ws, D<sub>2</sub>O exch., O-H), 2.34-2.28 (m, H<sub>α</sub>-C(6)), 2.31 (q, *J*=7.5 Hz, CH<sub>2</sub><sup>propionyl</sup>), 2.16 (dddd(dtd), *J*= 14.0; 9.5; 9.5; 6.5 Hz, H<sub>α</sub>-C(16)), 2.04-1.92 (m, H<sub>β</sub>-C(11), H<sub>β</sub>-C(8) and H<sub>β</sub>-C(7)), 1.78 (ddd, *J*=12.5; 4.0; 3.0 Hz, H<sub>β</sub>-C(12)), 1.67 (dddd(dtd), *J*=13.5; 4.0; 4.0; 2.0 Hz, H<sub>α</sub>-C(11)), 1.65 (dddd, *J*=12.5; 10.5; 7.5; 3.0 Hz, H<sub>α</sub>-C(15)), 1.50 (dddd, *J*=14.5; 11.5; 8.0; 3.0 Hz, H<sub>β</sub>-C(16)), 1.39 (dddd(qd), *J*=12.0; 12.0; 12.0; 6.0 Hz, H<sub>β</sub>-C(16)), 1.17 (ddd(td), *J*=13.0; 13.0; 4.5 Hz, H<sub>α</sub>-C(12)), 1.13 (t, *J*=7.5 Hz, CH<sub>3</sub><sup>propionyl</sup>), 1.16-1.00 (m, H<sub>α</sub>-C(7), H<sub>α</sub>-C(14) and H<sub>α</sub>-C(9)), 0.89 (s, H<sub>3</sub>C(18)) ppm. <sup>13</sup>C NMR (125 MHz, CDCl<sub>3</sub>) : 186.26 (C(3)), 174.82 (C=O<sup>propionyl</sup>), 166.73 (C(5)), 151.76 (C(1)), 127.95 (C(2)), 122.87 (C(4)), 82.45 (C(17)), 70.32 (C(10)), 54.58 (C(9)), 49.82 (C(14)), 43.04 (C(13)), 36.66 (C(12)), 34.95 (C(8)), 33.30 (C(7)), 32.26 (C(6)), 28.01 (CH<sub>2</sub><sup>propionyl</sup>), 27.67 (C(16)), 24.00 (C(15)), 22.51 (C(11)), 12.21 (C(18)), 9.46 (CH<sub>3</sub><sup>propionyl</sup>) ppm. Anal. Calcd. for C<sub>21</sub>H<sub>28</sub>O<sub>4</sub> (344.44): C 73.22 H 8.21, found: C 73.35 H 8.227.

**10β,17β-dihydroxy-17α-benzylestra-1,4-dien-3-one (2e):** mp = 235-240 °C (colourless needles, petroleum ether/acetone; decomp.). IR(KBr): 3426, 3180, 2948, 2856, 1661, 1613, 1116, 1023, 890, 818, 756 cm<sup>-1</sup>.  $\lambda_{\max}^{\text{MeOH}} = 209$  (27000), 237 (17000), 280 (7000) nm. <sup>1</sup>H NMR (500 MHz, CDCl<sub>3</sub>+CD<sub>3</sub>OD): 7.30-7.20 (m, 5H<sup>Ph</sup>), 7.21 (d, *J*<sub>1,2</sub>=10.5 Hz, H-C(1)), 6.16 (dd, *J*<sub>1,2</sub>=10.5 Hz, *J*<sub>2,4</sub>=2.0 Hz, H-C(2)), 6.00 (dd(<sup>irr</sup>t), <sup>4</sup>*J*<sub>2,4</sub>=2.0 Hz, <sup>4</sup>*J*<sub>4,6β</sub>=1.0 Hz, H-C(4)), 2.83 (d, *J*=13.0 Hz, CH<sub>2</sub><sup>benzyl</sup>), 2.81 (dddd(tdd), *J*= 11.5; 11.5; 5.0; 1.5 Hz, H<sub>β</sub>-C(6)), 2.56 (d, *J*=13.5 Hz, CH<sub>2</sub><sup>benzyl</sup>), 2.36 (ddd, *J*=12.0; 3.5; 2.5 Hz, H<sub>α</sub>-C(6)), 2.11-2.04 (m, H<sub>β</sub>-C(11)), 2.07 (ddd(td), *J*=12.5; 12.5; 4.0 Hz, H<sub>β</sub>-C(8)), 2.06-2.00 (m, H<sub>β</sub>-C(7)), 1.85 (ddd(td), *J*=9.5; 9.5; 5.0 Hz, H<sub>α</sub>-C(16)), 1.77 (dddd(dtd), *J*= 13.0; 4.0; 4.0; 3.0 Hz, H<sub>α</sub>-C(11)), 1.68 (ddd, *J*= 12.5; 3.5; 3.0 Hz, H<sub>β</sub>-C(12)), 1.64-1.58 (m, H<sub>α</sub>-C(15)), 1.48 (ddd(td), *J*=12.5; 12.5; 4.5 Hz, H<sub>α</sub>-C(12)), 1.42-1.28 (m, H<sub>β</sub>-C(16), H<sub>β</sub>-C(15) and H<sub>α</sub>-C(14)), 1.14 (ddd(td), *J*=12.5; 12.5; 4.0 Hz, H<sub>α</sub>-C(9)), 1.10 (dddd(tdd), *J*=12.0; 12.0; 4.0; 3.5 Hz, H<sub>α</sub>-C(7)), 1.04 (s, H<sub>3</sub>C(18)) ppm. <sup>13</sup>C NMR (125 MHz, CDCl<sub>3</sub>): 187.10 (C(3)), 169.09 (C(5)), 153.67 (C(1)), 138.54 (C<sub>Ar</sub>(1')), 131.00 (C<sub>Ar</sub>(3')), 127.76 (C<sub>Ar</sub>(2')), 126.79 (C(2)), 125.99 (C<sub>Ar</sub>(4')), 121.79 (C(4)), 83.04 (C(17)), 69.96 (C(10)), 55.10 (C(9)), 49.51 (C(14)), 46.98 (C(13)), 42.38 (CH<sub>2</sub><sup>benzyl</sup>), 35.88 (C(8)), 33.65 (C(7)), 32.17 (C(16)), 32.15 (C(6)), 30.82 (C(12)), 23.69 (C(15)), 22.76 (C(11)), 14.29 (C(18)) ppm. HRMS: calculated for MH<sup>+</sup> 379.22367, measured 379.22677. Anal. Calcd. for C<sub>25</sub>H<sub>30</sub>O<sub>3</sub> (378.504): C 79.32 H 8.00, found: C 79.25 H 8.099.

**17α-butyl-10β,17β-dihydroxyestra-1,4-dien-3-one (2f):** mp= 100-103 °C (colourless needles, petroleum ether/acetone). IR(KBr): 3425, 2949, 2863, 1664, 1624, 1121, 1014, 891, 808, 697 cm<sup>-1</sup>.  $\lambda_{\max}^{\text{MeOH}} = 233$  nm (14000). <sup>1</sup>H NMR (500 MHz, CDCl<sub>3</sub>) : 7.21 (d, *J*<sub>1,2</sub>=10.0 Hz, H-C(1)), 6.12 (dd, *J*<sub>1,2</sub>=10.0 Hz, *J*<sub>2,4</sub>=2.0 Hz, H-C(2)), 5.95 (dd(<sup>irr</sup>t), *J*=2.0; 1.0 Hz, H-C(4)), 2.77 (dddd(tdd), *J*=12.5; 12.5; 5.5; 1.0 Hz, H<sub>β</sub>-C(6)), 2.32 (ddd, *J*=12.5; 3.5; 2.5 Hz, H<sub>α</sub>-C(6)), 2.05-1.97 (m, H<sub>β</sub>-C(8) and H<sub>β</sub>-C(7)), 2.03 (dddd(tdd), *J*=13.5; 13.5; 3.5; 1.5 Hz, H<sub>β</sub>-C(11)), 1.90 (ddd, *J*=14.0; 9.5; 6.0 Hz, H<sub>α</sub>-C(16)), 1.71 (dddd(dtd), *J*=13.0; 4.0; 4.0; 2.5 Hz, H<sub>α</sub>-C(11)), 1.62-1.50 (m, H<sub>α</sub>-C(15)), 1.58 (ddd(td), *J*=13.5; 13.5; 2.5 Hz, H<sub>β</sub>-C(16)), 1.54 (ddd, *J*=12.5; 4.0; 3.0 Hz, H<sub>β</sub>-C(12)), 1.52-1.42 (m, overlapped H-CH(1')<sup>n-Bu</sup> and H-CH(2')<sup>n-Bu</sup>), 1.41-1.27 (m, overlapped H<sub>β</sub>-C(15), H-CH(1')<sup>n-Bu</sup>, H-CH(2')<sup>n-Bu</sup> and CH<sub>2</sub>(3')<sup>n-Bu</sup>), 1.21 (ddd(td), *J*=11.5; 11.5; 7.5 Hz, H<sub>α</sub>-C(14)), 1.06-0.98 (m, overlapped H<sub>α</sub>-C(9) and H<sub>α</sub>-C(7)), 0.95 (s, H<sub>3</sub>C(18)), 0.92 (t, *J*=7.0 Hz, H<sub>3</sub>C(4')<sup>n-Bu</sup>) ppm. <sup>13</sup>C NMR (125 MHz, CDCl<sub>3</sub>): 187.56 (C(3)), 169.83 (C(5)), 154.43 (C(1)), 126.96 (C(2)), 122.08 (C(4)), 83.41 (C(17)), 70.44 (C(10)), 55.97 (C(9)), 50.16 (C(14)), 47.31 (C(13)), 36.71 (C(1')<sup>n-Bu</sup>), 36.49 (C(8)), 34.23 (C(7)), 33.31 (C(16)), 32.57 (C(6)), 31.75 (C(12)), 26.31 (C(2')<sup>n-Bu</sup>), 24.29 (C(15)), 23.95 (C(3')<sup>n-Bu</sup>), 23.21 (C(11)), 14.37 (C(18)), 13.95 (C(4')<sup>n-Bu</sup>) ppm. HRMS: calculated for MH<sup>+</sup> 344.23460, measured 344.23270. Anal. Calcd. for C<sub>22</sub>H<sub>32</sub>O<sub>3</sub> (344.488): C 76.70 H 9.363 found: C 76.55 H 9.423.

**10β-hydroxy-4β,5β-epoxyestr-1-en-3,17-dione (3a):**<sup>1</sup>H NMR (250 MHz, DMSO-d<sub>6</sub>): 6.68 (d, *J*=10.6 Hz, H-C(1)), 5.79 (s, HO-C(10)), 5.77 (dd, *J*=10.6 Hz, *J*=2.2 Hz, H-C(2)), 3.33 (d, *J*=2.2 Hz, H-C(4)), 2.45-2.25 (m, 2H), 0.81 (s, H<sub>3</sub>C-C(13)) ppm. <sup>13</sup>C NMR (50 MHz, DMSO-d<sub>6</sub>):

219.54, 195.14, 153.06, 122.33, 71.74, 64.59, 59.56, 54.19, 48.99, 46.93, 35.12, 33.62, 30.53, 28.15, 21.45, 20.55, 13.30 ppm.

**10 $\beta$ ,17 $\beta$ -dihydroxy-4 $\beta$ ,5 $\beta$ -epoxyestr-1-en-3-one (3b)**: colourless oil. IR(KBr): 3515, 3288, 2938, 1681, 1604, 1267, 1130, 1051, 843, 733 cm<sup>-1</sup>.  $\lambda_{\text{max}}^{\text{MeOH}} = 240$  nm (7000). <sup>1</sup>H NMR (200 MHz, CD<sub>3</sub>OD): 6.73 (d, *J*=10.6 Hz, H-C(1)), 5.78 (dd, *J*=10.6 Hz, *J*=2.2 Hz, H-C(2)), 3.56 (t, *J*=8.4 Hz, H-C(17)), 3.32-3.29 (m, 1H), 3.23 (d, *J*=2.2 Hz, H-C(4)), 2.43 (td, *J*=13.4; 4.2 Hz), 2.08-0.88 (m), 0.80 (s, H<sub>3</sub>C-C(13)) ppm. <sup>13</sup>C NMR (50 MHz, CD<sub>3</sub>OD): 197.27, 154.06, 123.69, 82.25, 73.82, 65.95, 61.58, 56.21, 50.97, 43.94, 37.26, 35.93, 30.34, 30.14, 29.77, 24.29, 22.34, 11.44 ppm. Anal. Calcd. for C<sub>18</sub>H<sub>24</sub>O<sub>4</sub> (304.386): C 71.03 H 7.95, found: C 71.02 H 7.921.

**17 $\beta$ -acetoxy-4 $\beta$ ,5 $\beta$ -epoxy-10 $\beta$ -hydroxyestr-1-en-3-one (3c)**: <sup>1</sup>H NMR (250 MHz, CDCl<sub>3</sub>): 6.62 (d, *J*=10.7 Hz, H-C(1)), 5.80 (dd, *J*=10.7 Hz, *J*=2.1 Hz, H-C(2)), 4.56 (dd, *J*=7.5 Hz, 1.6 Hz, H-C(17)), 3.28 (d, *J*=2.1 Hz, H-C(4)), 2.03 (s, H<sub>3</sub>C<sup>Ac</sup>), 0.82 (s, H<sub>3</sub>C(18)) ppm. <sup>13</sup>C NMR (62.9 MHz, CDCl<sub>3</sub>): 194.69, 171.18, 150.87, 123.29, 82.38, 72.81, 64.80, 61.24, 53.57, 49.39, 42.38, 36.06, 34.27, 28.84, 28.66, 27.18, 23.46, 21.09, 21.01, 11.84 ppm.

**4 $\beta$ ,5 $\beta$ -epoxy-10 $\beta$ -hydroxy-17 $\beta$ -propionyloxyestr-1-en-3-one (3d)**: colourless oil. IR(KBr): 3450, 2942, 2876, 2853, 1733, 1686, 1279, 1192, 1082, 841, 731 cm<sup>-1</sup>.  $\lambda_{\text{max}}^{\text{MeOH}} = 230$  (9000) nm. <sup>1</sup>H NMR (200 MHz, CDCl<sub>3</sub>): 6.64 (d, *J*<sub>1,2</sub>=11.0 Hz, H-C(1)), 5.82 (dd, *J*<sub>1,2</sub>=11.0 Hz, *J*<sub>2,4</sub>=2.5 Hz, H-C(2)), 4.59 (dd, *J*=9.0; 8.0 Hz, H $\alpha$ -C(17)), 3.30 (d, *J*<sub>2,4</sub>=2.5 Hz, H $\alpha$ -C(4)), 2.82 (ws, H-O, D<sub>2</sub>O exch.), 2.46 (ddd(td), *J*=13.5; 13.5; 4.5 Hz), 2.32 (q, *J*=7.5 Hz, CH<sub>2</sub><sup>propionyl</sup>), 2.18 (dddd(dtd), *J*=13.5; 9.5; 9.5; 6.0 Hz, H $\alpha$ -C(16)), 1.93-1.80 (m, 3H, H $\beta$ -C(7), H $\beta$ -C(8), H $\beta$ -C(11)), 1.77 (ddd, *J*=13.0; 4.5; 2.5 Hz, H $\beta$ -C(12)), 1.68 (dddd, *J*=12.0; 10.0; 7.0; 3.0 Hz, H $\alpha$ -C(15)), 1.56 (dddd(dtd), *J*=13.5; 4.0; 4.0; 2.5 Hz, H $\alpha$ -C(17)), 1.51 (dddd, *J*=13.5; 11.5; 7.5; 3.0 Hz, H $\beta$ -C(16)), 1.38 (dddd(qd), *J*=12.0; 12.0; 12.0; 6.0 Hz, H $\beta$ -C(15)), 1.28 (ddd(dt), *J*=13.5; 3.0; 3.0 Hz, H $\alpha$ -C(6)), 1.18-1.09 (m, 2H, H $\alpha$ -C(7), H $\alpha$ -C(12)), 1.13 (t, *J*=7.5 Hz, CH<sub>3</sub><sup>propionyl</sup>), 1.10-1.01 (m, 2H, H $\alpha$ -C(9), H $\alpha$ -C(14)), 0.8 (s, H<sub>3</sub>C(18)) ppm. <sup>13</sup>C NMR (50 MHz, CDCl<sub>3</sub>): 194.65 (C(3)), 174.48 (C=O<sup>propionyl</sup>), 150.76 (C(1)), 123.35 (C(2)), 82.14 (C(17)), 72.86 (C(10)), 64.81 (C(5)), 61.31 (C(4)), 53.58 (C(9)), 49.46 (C(14)), 42.48 (C(13)), 36.14 (C(12)), 34.33 (C(8)), 28.87 (C(7)), 28.70 (C(6)), 27.73 (CH<sub>2</sub><sup>propionyl</sup>), 27.26 (C(16)), 23.50 (C(15)), 21.04 (C(11)), 11.86 (C(18)), 9.19 (CH<sub>3</sub><sup>propionyl</sup>) ppm. HRMS: calculated for MH<sup>+</sup> 361.20095, measured 361.19829. Anal. Calcd. for C<sub>21</sub>H<sub>28</sub>O<sub>5</sub> (360.44): C 69.98 H 7.83 found : C 69.91 H 7.916.

**10 $\beta$ ,17 $\beta$ -dihydroxy-4 $\beta$ ,5 $\beta$ -epoxy-17 $\alpha$ -benzylestr-1-en-3-one (3e)**: colourless oil. IR(KBr): 3520, 3389, 3080, 3030, 2961, 1680, 1630, 1620, 1250, 1123, 893, 709 cm<sup>-1</sup>.  $\lambda_{\text{max}}^{\text{MeOH}} = 217$  (11000), 232 (6000), 279 (2000) nm. <sup>1</sup>H NMR (200 MHz, CDCl<sub>3</sub>): 7.39-7.21 (m, 5H), 6.68 (d, *J*<sub>1,2</sub>=10.6 Hz, H-C(1)), 5.85 (dd, *J*<sub>1,2</sub>=10.6 Hz, *J*<sub>2,4</sub>=2.0 Hz, H-C(2)), 3.32 (d, *J*<sub>2,4</sub>=2.0 Hz, H $\alpha$ -C(4)), 2.85 (d, *J*=13.2 Hz, 1H, CH<sub>2</sub><sup>benzyl</sup>), 2.55 (d, *J*=13.2 Hz, 1H, CH<sub>2</sub><sup>benzyl</sup>), 2.49 (td, *J*=16.0; 4.0), 2.28 (ws, H-O), 2.13-1.25 (m), 1.02 (s, H<sub>3</sub>C(18)) ppm. <sup>13</sup>C NMR (50 MHz, CDCl<sub>3</sub>): 194.87 (C(3)), 151.07 (C(1)), 137.99 (C<sub>Ar</sub>(1')), 130.99 (C<sub>Ar</sub>(2',6')), 128.16 (C<sub>Ar</sub>(3',5')), 126.40 (C<sub>Ar</sub>(4')), 123.34 (C(2)), 82.95 (C(17)), 72.98 (C(10)), 64.95 (C(5)), 61.34 (C(4)), 53.73 (C(9)), 49.18 (C(14)), 46.34 (C(13)), 42.21 (CH<sub>2</sub><sup>benzyl</sup>), 35.43 (C(8)), 33.30 (C(16)), 30.63 (C(7)), 29.08 (C(6)), 28.75 (C(11)), 23.82 (C(12)), 21.30 (C(15)), 14.31 (C(18)) ppm. HRMS: calculated for MH<sup>+</sup> 395.21778, measured 395.22169. Anal. Calcd. for C<sub>25</sub>H<sub>30</sub>O<sub>4</sub> (394.55): C 76.10 H 7.68, found: C 76.18 H 7.754.

**17 $\alpha$ -butyl-10 $\beta$ ,17 $\beta$ -dihydroxy-4 $\beta$ ,5 $\beta$ -epoxyestr-1-en-3-one (3f)**: colourless oil. IR(KBr): 3477, 3425, 2937, 2874, 1683, 1620, 1293, 1133, 1082, 842, 735, 701 cm<sup>-1</sup>.  $\lambda_{\text{max}}^{\text{MeOH}} = 231$  (6000), 280 (800) nm. <sup>1</sup>H NMR (200 MHz, CDCl<sub>3</sub>): 6.65 (d, *J*<sub>1,2</sub>=10.5 Hz, H-C(1)), 5.82 (dd, *J*<sub>1,2</sub>=10.5 Hz, *J*<sub>2,4</sub>=2.0 Hz, H-C(2)), 3.29 (d, *J*<sub>2,4</sub>=2.0 Hz, H $\alpha$ -C(4)), 2.46 (ddd(td), *J*=13.5; 13.5; 4.0 Hz, H $\beta$ -C(6)), 1.97 (ddd, *J*=15.0; 10.5; 7.5 Hz, H $\alpha$ -C(16)), 1.91 (dddd(qd), *J*=13.0; 13.0; 13.0; 4.0 Hz, H $\beta$ -C(11)), 1.91-1.82 (m, 2H, H $\beta$ -C(7), H $\beta$ -C(8)), 1.62-1.53 (m, 3H, H $\alpha$ -C(11), H $\alpha$ -C(15), H $\beta$ -C(16)), 1.50 (ddd(dt), *J*=12.5; 3.5; 3.5 Hz, H $\beta$ -C(12)), 1.47-1.30 (m, 8H, H $\alpha$ -C(12), H $\beta$ -C(15), H<sub>2</sub>C(1')<sup>n-Bu</sup>, H<sub>2</sub>C(2')<sup>n-Bu</sup>, H<sub>2</sub>C(3')<sup>n-Bu</sup>), 1.27 (ddd(dt), *J*=13.5; 3.0; 3.0 Hz, H $\alpha$ -C(6)), 1.19 (ddd(td), *J*=12.0; 12.0; 7.5 Hz, H $\alpha$ -C(14)), 1.07 (dddd(qd), *J*=13.0; 13.0; 13.0; 3.5 Hz, H $\alpha$ -C(7)), 1.02 (ddd, *J*=13.0; 12.5;

4.0 Hz, H<sub>α</sub>-C(9)), 0.94 (s, H<sub>3</sub>C(18)), 0.91 (t, *J*=7.0 Hz, H<sub>3</sub>C(4')<sup>*n*-Bu</sup>) ppm. <sup>13</sup>C NMR (50 MHz, CDCl<sub>3</sub>): 194.80 (C(3)), 151.14 (C(1)), 123.20 (C(2)), 83.32 (C(17)), 72.93 (C(10)), 64.93 (C(5)), 61.29 (C(4)), 53.77 (C(9)), 49.15 (C(14)), 46.19 (C(13)), 36.33 (C(1')<sup>*n*-Bu</sup>), 35.38 (C(8)), 33.97 (C(16)), 30.83 (C(12)), 29.10 (C(7)), 28.76 (C(6)), 25.69 (C(2')<sup>*n*-Bu</sup>), 23.63 (C(15)), 23.48 (C(3')<sup>*n*-Bu</sup>), 21.32 (C(11)), 14.23 (C(18)), 14.16 (C(4')<sup>*n*-Bu</sup>) ppm. HRMS: calculated for MH<sup>+</sup> 345.24702, measured 345.24242. Anal. Calcd. for C<sub>22</sub>H<sub>32</sub>O<sub>4</sub> (360.487): C 73.28 H 8.96, found: C 73.35 H 9.06.

**General procedure 2:** Oxidation of steroidal epoxyquinols with H<sub>2</sub>O<sub>2</sub>/ Na<sub>2</sub>CO<sub>3</sub> system (3c,d → 4c,d)

To a solution of epoxyquinol (1 mmol) in EtOH (5 mL) at 60 °C, oxidizing solution (1 mL) was added (oxidizing solution was made from 200 mg of Na<sub>2</sub>CO<sub>3</sub>, 1 mL of H<sub>2</sub>O<sub>2</sub> (30%) and 5 mL of water). After 20 minutes of reflux, reaction mixture was cooled, diluted with water (5 mL), neutralized with diluted HCl (3.6 %, 1 mL) and evaporated to the one half of the volume. Solution was extracted with DCM (4×5 mL) and combined organic layers were dried over anh. Na<sub>2</sub>SO<sub>4</sub>, filtered and evaporated to dryness. Crude products were purified by dry-flash chromatography on silica.

**17β-acetoxy-1β,2β;4β,5β-diepoxy-10β-hydroxyestra-3-one(4c)** was synthesized from 17β-acetoxy-4β,5β-epoxy-10β-hydroxyestra-1-en-3-one (3c, 340 mg, 0.980 mmol), according to *General procedure 2*, as a colourless needles crystalized from benzene (270 mg, 76%). mp = 222-225 °C (colourless needles, benzene). IR (KBr): 3446, 2950, 1734, 1712, 1250, 1045, 824, 765, 735 cm<sup>-1</sup>. <sup>1</sup>H NMR (500 MHz, CDCl<sub>3</sub>): 4.60 (dd, *J*=9.0; 8.0 Hz, H<sub>α</sub>-C(17)), 3.84 (d, *J*<sub>1,2</sub>=4.0 Hz, H<sub>α</sub>-C(1)), 3.49 (dd, *J*=4.0; 2.5 Hz, H<sub>α</sub>-C(2)), 3.26 (d, *J*<sub>2,4</sub>=2.5 Hz, H<sub>α</sub>-C(4)), 3.22 (s, O-H), 2.43 (ddd(td), *J*=13.0; 13.0; 4.0 Hz, H<sub>β</sub>-C(6)), 2.18 (dddd(dtd), *J*=14.5; 9.5; 9.5; 6.5 Hz, H<sub>α</sub>-C(16)), 2.05 (s, H<sub>3</sub>C-C(O)), 1.91 (dddd(qd), *J*=12.0; 12.0; 12.0; 4.0 Hz, H<sub>β</sub>-C(11)), 1.86-1.78 (m, 3H (7β, 8β, 12β)), 1.75 (dddd(dtd), *J*=13.0; 4.0; 4.0; 2.5 Hz, H<sub>α</sub>-C(11)), 1.66 (dddd, *J*=12.5; 10.0; 7.5; 3.0 Hz, H<sub>α</sub>-C(15)), 1.53 (dddd, *J*=14.5; 12.0; 8.0; 3.5 Hz, H<sub>β</sub>-C(16)), 1.37 (dddd(qd), *J*=12.0; 12.0; 12.0; 6.0 Hz, H<sub>β</sub>-C(15)), 1.21 (ddd(td), *J*= 13.0; 13.0; 4.5 Hz, H<sub>α</sub>-C(12)), 1.15 (ddd, *J*=12.5; 10.5; 4.5 Hz, H<sub>α</sub>-C(9)), 1.10-1.00 (m, 3H (6α, 7α, 14α)), 0.88 (s, H<sub>3</sub>C(18)) ppm. <sup>13</sup>C NMR (125 MHz, CDCl<sub>3</sub>): 199.93 (C(3)), 171.43 (C=O<sup>Ac</sup>), 82.63 (C(17)), 71.89 (C(5)), 70.25 (C(10)), 63.60 (C(4)), 62.94 (C(1)), 57.35 (C(2)), 49.77 (C(14)), 49.04 (C(9)), 42.55 (C(13)), 36.44 (C(12)), 34.19 (C(8)), 30.72 (C(6)), 29.10 (C(7)), 27.55 (C(16)), 23.80 (C(15)), 21.35 (CH<sub>3</sub><sup>Ac</sup>), 20.88 (C(11)), 12.12 (C(18)) ppm. MS (DCI, m/e): 363 (MH<sup>+</sup>, 100), 345 (MH<sup>+</sup>-H<sub>2</sub>O, 24), 303 (MH<sup>+</sup>-AcOH, 70). Anal. Calcd. for C<sub>20</sub>H<sub>26</sub>O<sub>6</sub> (362.417): C 66.28 H 7.231, found: C 66.31 H 7.253.

**1β,2β,4β,5β-diepoxy-10β-hydroxy-17β-propionyloxyestra-3-one (4d)** was synthesized from 4β,5β-epoxy-10β-hydroxy-17β-propionyloxyestra-1-en-3-one (3d, 80 mg, 0.221 mmol) according to *General procedure 2*, as a colourless needles crystalized from benzene (31 mg, 37%). mp = 177-181 °C (colourless needles, benzene). IR(KBr): 3459, 2928, 1732, 1191, 1078, 826, 765, 720 cm<sup>-1</sup>. <sup>1</sup>H NMR (200 MHz, CDCl<sub>3</sub>): 4.62 (dd, *J*=8.8 Hz, *J*=7.6 Hz, H<sub>α</sub>-C(17)), 3.84 (d, *J*<sub>1,2</sub>=4.0 Hz, H<sub>α</sub>-C(1)), 3.49 (dd, *J*<sub>1,2</sub>= 4.0 Hz, *J*<sub>2,4</sub>= 2.6 Hz, H<sub>α</sub>-C(2)), 3.27 (d, *J*<sub>2,4</sub>= 2.6 Hz, H<sub>α</sub>-C(4)), 2.74 (s, HO-C(10)), 2.41 (td, *J*=13.8; 4.4 Hz), 2.33 (q, *J*=7.6 Hz, CH<sub>2</sub><sup>propionyl</sup>), 2.28-2.08 (m), 2.05-0.95 (m), 1.14 (t, *J*=7.6 Hz, H<sub>3</sub>C<sup>propionyl</sup>), 0.88 (s, H<sub>3</sub>C(18)) ppm. <sup>13</sup>C NMR (50 MHz, CDCl<sub>3</sub>): 199.58 (C(3)), 174.65 (C(O)Et), 82.12 (C(17)), 71.59 (C(10)), 70.10 (C(5)), 63.51 (C(1)), 62.60 (C(2)), 57.19 (C(4)), 49.51 (C(14)), 48.65 (C(9)), 42.34 (C(13)), 36.18 (C(16)), 33.98 (C(8)), 30.48 (C(6)), 28.79 (C(7)), 27.73 (C(O)-CH<sub>2</sub>-CH<sub>3</sub>), 27.31 (C(11)), 23.55 (C(12)), 20.61 (C(15)), 11.86 (CH<sub>3</sub>-C(13)), 9.20 (H<sub>3</sub>C-CH<sub>2</sub>-C(O)) ppm. MS (DCI, m/e): 377 (MH<sup>+</sup>, 100), 359 (MH<sup>+</sup>-H<sub>2</sub>O, 12), 303 (MH<sup>+</sup>-C<sub>2</sub>H<sub>5</sub>COOH, 40). Anal. Calcd. for C<sub>21</sub>H<sub>28</sub>O<sub>6</sub> (376.443): C 67.00 H 7.498, found: C 67.18 H 7.522.

**Epoxy-ring opening reaction** with LiCl/Amberlyst 15 in acetone (3a → 5 + 6)

A) Suspension of epoxyquinol 3a (200 mg, 0.661 mmol), LiCl (90 mg, 2.123 mmol) and Amberlyst 15 (450 mg) in acetone (5 mL) was stirred at room temperature for 30 minutes. After filtration and evaporation, mixture was purified by dry-flash chromatography over SiO<sub>2</sub> (eluent

DCM/acetone 9:1→1:1). Epoxyquinol **3a** (61mg, 31%) and 4 $\alpha$ -chloro-5 $\beta$ ,10 $\beta$ -dihydroxyestra-1-en-3,17-dione (**6**, 105 mg, 47%, colourless plates) were isolated.

**B)** Suspension of epoxyquinol **3a** (200 mg, 0.661 mmol), LiCl (90 mg, 2.123 mmol) and Amberlyst 15 (450 mg) in acetone (5 mL) was stirred at room temperature for 48 hours. After filtration and evaporation, mixture was purified by dry-flash chromatography over SiO<sub>2</sub> (eluent DCM/acetone 9:1→1:1). Epoxyquinol **3a** (39 mg, 20%), 4-chloro-10 $\beta$ -hydroxyestra-1,4-dien-17-one (**5**, 80 mg, 42%, colourless plates) and 4 $\alpha$ -chloro-5 $\beta$ ,10 $\beta$ -dihydroxyestra-1-en-3,17-dione (**6**, 18 mg, 8%, colourless plates) were isolated and products **5** and **6** were crystalized from DIPE and methanol, respectively.

**4-chloro-10 $\beta$ -hydroxyestra-1,4-dien-17-one (5):** mp = 243-245 °C (colourless plates, DIPE).

IR(KBr): 3433, 2940, 2901, 1736, 1659, 1635, 1595, 1091, 1000, 899, 837, 794 cm<sup>-1</sup>.  $\lambda_{\max}^{\text{MeOH}} = 242$  (8000), 282 (4000). <sup>1</sup>H NMR (200 MHz, CDCl<sub>3</sub>): 7.24 (d,  $J_{1,2}=10.5$  Hz, H-C(1)), 6.26 (d,  $J_{1,2}=10.0$  Hz, H-C(2)), 3.16 (ddd(dt),  $J=13.0; 3.5; 3.5$  Hz, H $\alpha$ -C(6)), 2.69 (ddd(mtd),  $J=13.5; 13.0; 5.0$  Hz, H $\beta$ -C(6)), 2.45 (ddd,  $J=19.0; 8.0; 1.0$  Hz; H $\beta$ -C(16)), 2.17 (dddd(qd),  $J=11.0; 11.0; 11.0; 4.0$  Hz, H $\beta$ -C(8)), 2.12-2.07 (m, H $\beta$ -C(7)), 2.08 (ddd(dt),  $J=19.0; 9.0; 9.0$  Hz, H $\alpha$ -C(16)), 2.02 (ddd,  $J=13.5; 12.5; 4.0$  Hz, H $\beta$ -C(11)), 1.98 (dddd,  $J=12.0; 9.0; 6.0; 1.0$  Hz, H $\alpha$ -C(15)), 1.82-1.76 (m, 2H, H $\alpha$ -C(11), H $\beta$ -C(12)), 1.65 (dddd(tt),  $J=12.5; 12.5; 9.0; 9.0$  Hz, H $\beta$ -C(15)), 1.33 (ddd,  $J=12.5; 11.5; 5.5$  Hz, H $\alpha$ -C(14)), 1.26 (ddd(td),  $J=13.5; 13.5; 4.5$  Hz, H $\alpha$ -C(12)), 1.17 (ddd(dt),  $J=11.5; 4.0; 4.0$  Hz, H $\alpha$ -C(9)), 1.14 (dddd,  $J=13.5; 12.5; 10.5; 4.0$  Hz, H $\alpha$ -C(7)), 0.94 (s, H<sub>3</sub>C(18)) ppm. <sup>13</sup>C NMR (50 MHz, CDCl<sub>3</sub>): 223.29(C(17)), 179.92(C(3)), 163.51 (C(5)), 154.52 (C(1)), 127.46 (C(4)), 126.92(C(2)), 73.31 (C(10)), 57.14 (C(9)), 51.22 (C(14)), 49.23 (C(13)), 36.66 (C(16)), 35.96 (C(8)), 32.53 (C(7)), 32.40 (C(12)), 29.70 (C(6)), 22.70 (C(11)), 23.08 (C(15)), 14.26 (C(18)) ppm. Anal. Calcd. for C<sub>18</sub>H<sub>21</sub>ClO<sub>3</sub> (320.811): C 59.19 H 5.795, found: C 59.35 H 5.815.

**4 $\alpha$ -chloro-5 $\beta$ ,10 $\beta$ -dihydroxyestra-1-en-3,17-dione (6):** mp = 216-219 °C (colourless plates,

MeOH). IR (KBr): 3541, 3361, 1737, 1678, 1277, 860, 835, 795 cm<sup>-1</sup>.  $\lambda_{\max}^{\text{MeOH}} = 225$  (13000). <sup>1</sup>H NMR (250 MHz, acetone-d<sub>6</sub>): 6.89 (d,  $J_{1,2}=10.6$  Hz, H-C(1)), 5.92 (dd,  $J_{1,2}=10.6$  Hz,  $J_{2,4}=1.4$  Hz, H-C(2)), 5.24 (s, HO-), 4.22 (s, HO-), 4.21 (d,  $J_{2,4}=1.4$  Hz, H $\beta$ -C(4)), 2.50-2.30 (m), 1.85-1.18 (m), 0.91 (s, H<sub>3</sub>C-C(13)) ppm. <sup>13</sup>C NMR-DEPT (50 MHz, acetone-d<sub>6</sub>) : 219.78 (C(17)), 206.57 (C(3)), 153.24 (C(1)), 124.56 (C(2)), 75.46 (C(5)), 73.17 (C(10)), 62.41 (C(4)), 50.99 (C(14)), 48.59 (C(9)), 47.99 (C(13)), 35.84 (C(7)), 35.70 (C(16)), 33.84 (C(8)), 32.11 (C(11)), 27.27 (C(6)), 22.39 (C(12)), 21.70 (C(15)), 13.87 (CH<sub>3</sub>-C(13)) ppm. Anal. Calcd. for C<sub>18</sub>H<sub>23</sub>ClO<sub>4</sub> (338.826): C 63.81 H 6.84, found: C 63.75 H 6.917.

<sup>1</sup>D. Milić, T. Kop. Z. Juranić, M. J. Gašić, B. Tinant, G. Pocsfalvi and B. A. Šolaja, *Steroids*, 2005, **70**, 922-932.

<sup>2</sup>L.C. Ciobanu, R.P.Boivin, V. Luu-The, F.Labrie and D. Poirier, *J. Med. Chem.* 1999, **42**, 2280-2286.

<sup>3</sup>R.P.Boivin, V. Luu-The, R. Lachance, F.Labrie and D. Poirier, *J. Med. Chem.* 2000, **43**, 4465-4478.

<sup>4</sup>D. R. Milić, M. J. Gašić, W. Muster, J. J. Csanadi and B. A. Šolaja, *Tetrahedron*, 1997, **53**, 14073-14084.

<sup>5</sup>L. Prokai, V. Nguyen, S. Szarka, P. Garg, G. Sabnis, H. A. Bimonte-Nelson, K. J. McLaughlin, J. S. Talboom, C. D. Conrad, P. J. Shughrue, T. D. Gould, A. Brodie, I. Merchenthaler, P. Koulen, K. Prokai-Tatrai, *Sci. Transl. Med.*, 2015, **7**, 297ra113.

## 2. Table S1: Antineoplastic activity of newly synthesized derivatives

| Compound  | Fem-X <sup>b</sup> | IC <sub>50</sub> ±SD (μM) <sup>a</sup> |                   |
|-----------|--------------------|----------------------------------------|-------------------|
|           |                    | HeLa <sup>c</sup>                      | K562 <sup>d</sup> |
| <b>2b</b> | >100               | 90.71±6.80                             | 92.56±5.29        |
| <b>2d</b> | 62                 | 24                                     | 34.5              |
| <b>2e</b> | 70.61±7.97         | 49.63±15.81                            | 36.13±6.31        |
| <b>2f</b> | 41.73±2.67         | 35.05±9.32                             | 26.74±5.66        |
| <b>5</b>  | 81.38±1.21         | 47.69±1.37                             | 42.62±10.35       |
| <b>3b</b> | 8.18±0.69          | 8.36±2.74                              | 5.67±0.33         |
| <b>3d</b> | 1.16±0.37          | 1.48±0.16                              | 1.30±0.98         |
| <b>3e</b> | 5.05±1.71          | 5.50±2.85                              | 3.72±2.16         |
| <b>3f</b> | 4.65±1.55          | 3.95±1.43                              | 1.00±0.37         |
| <b>4c</b> | 0.51±0.02          | 1.10±0.06                              | 0.66±0.05         |
| <b>4d</b> | 0.55±0.03          | 0.87±0.38                              | 0.84±0.07         |
| <b>6</b>  | 3.22±0.96          | 7.04±2.96                              | 3.88±0.45         |

<sup>a</sup> concentrations that induce 50% decrease in cell survival; <sup>b</sup>human malignant melanoma; <sup>c</sup> human cervix carcinoma; <sup>d</sup> human myelogenous leukemia.



### 3. NMR spectra of compounds

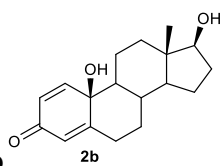

#### 3.1. Spectra of compound **2b**

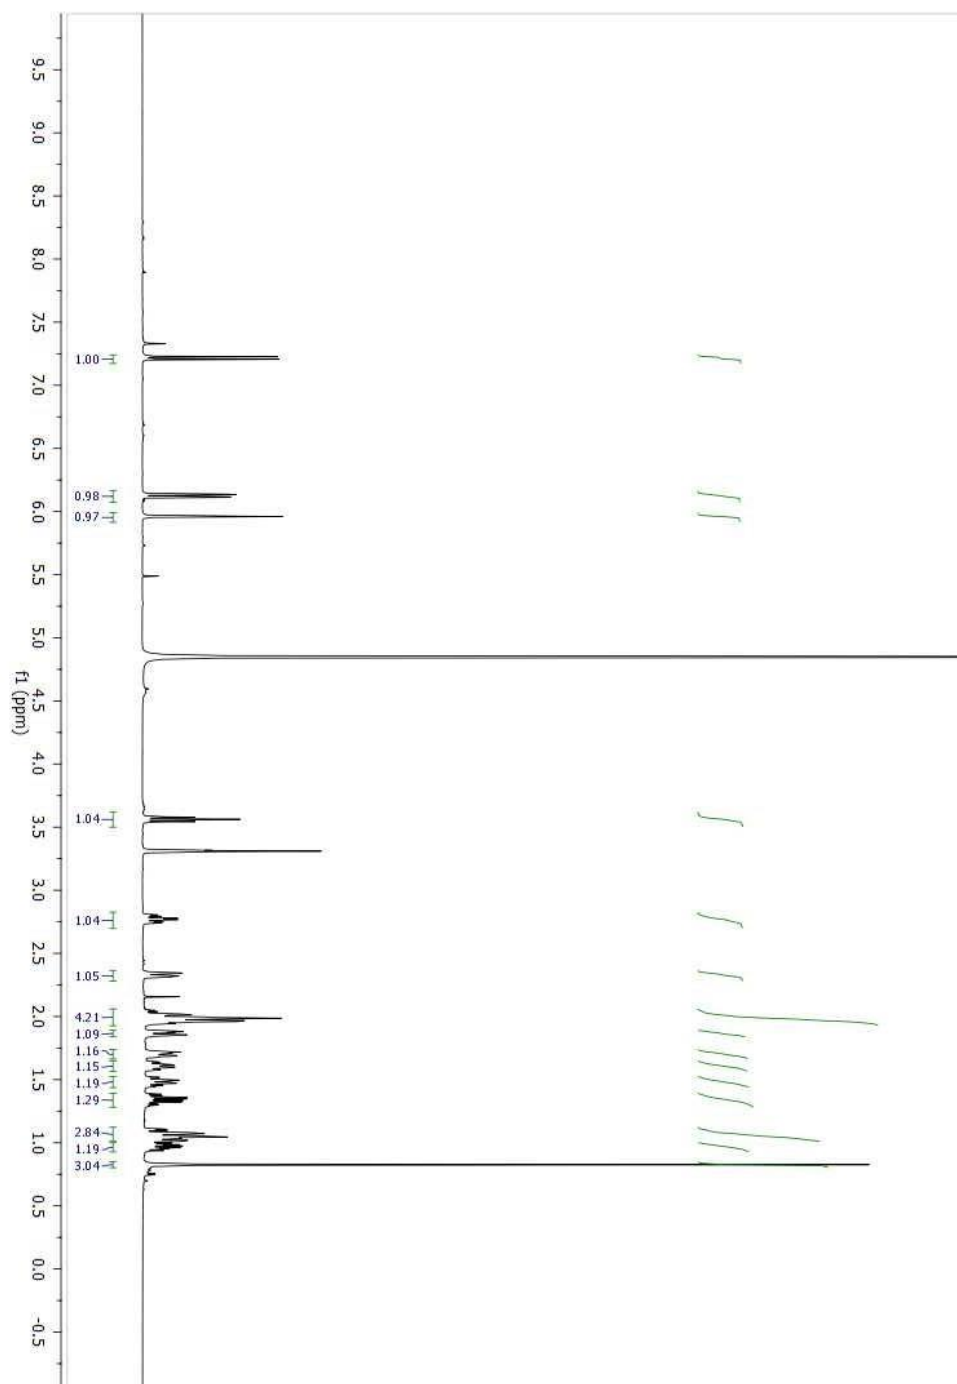

$^1\text{H}$  NMR spectrum (500 MHz, Methanol- $d_4$ ) of compound **2b**

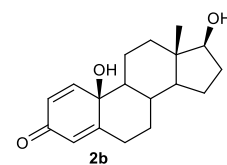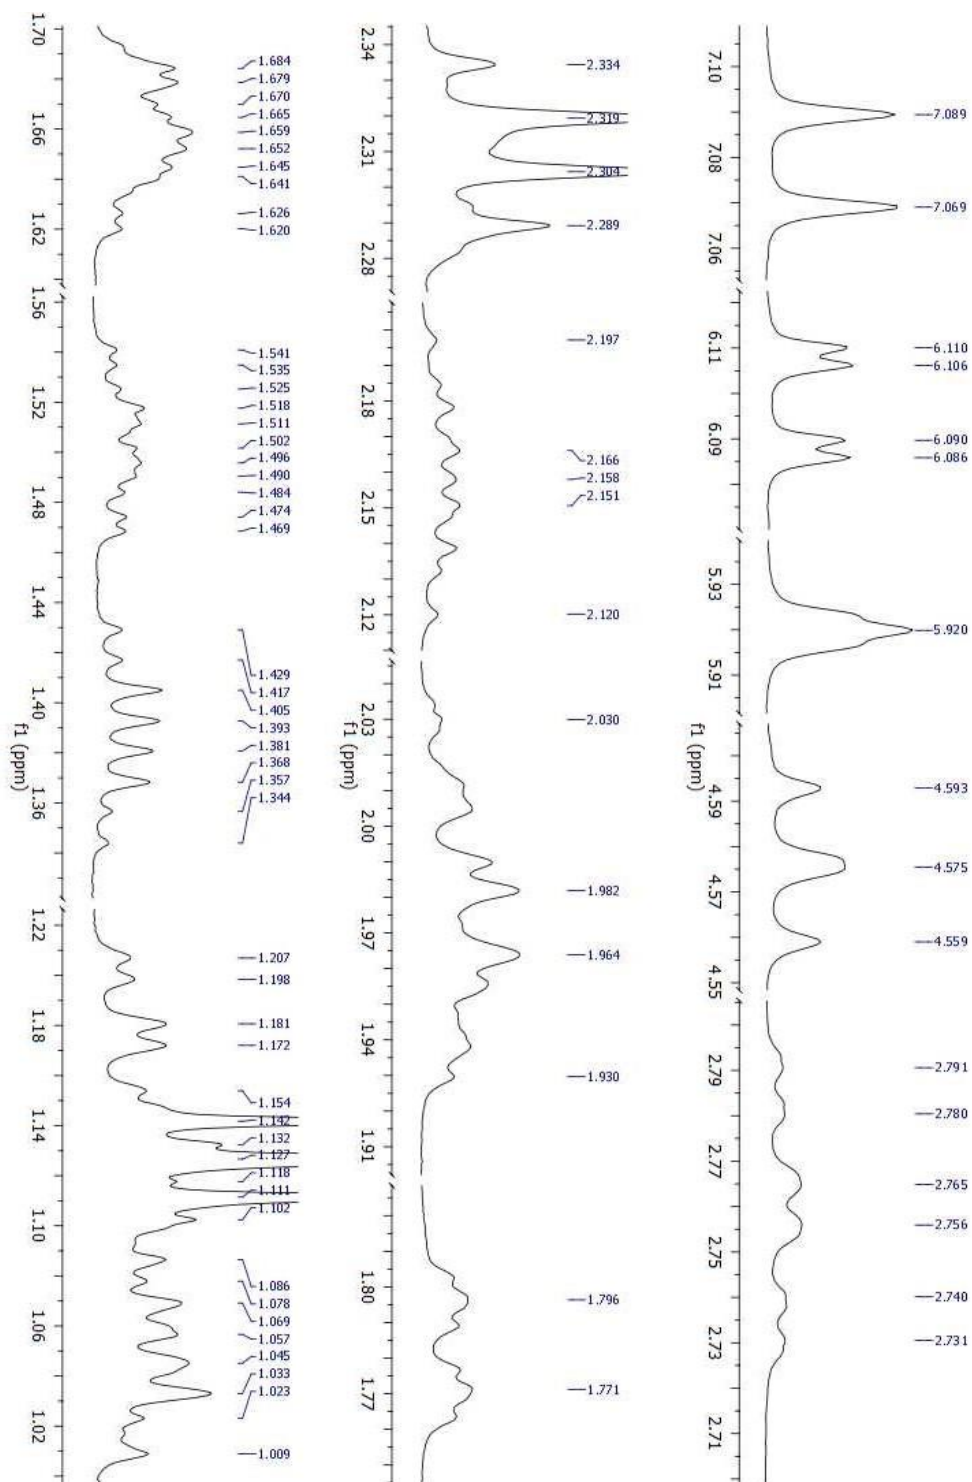

<sup>1</sup>H NMR spectrum (500 MHz, Methanol-*d*<sub>4</sub>) of compound **2b**

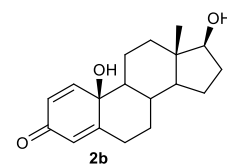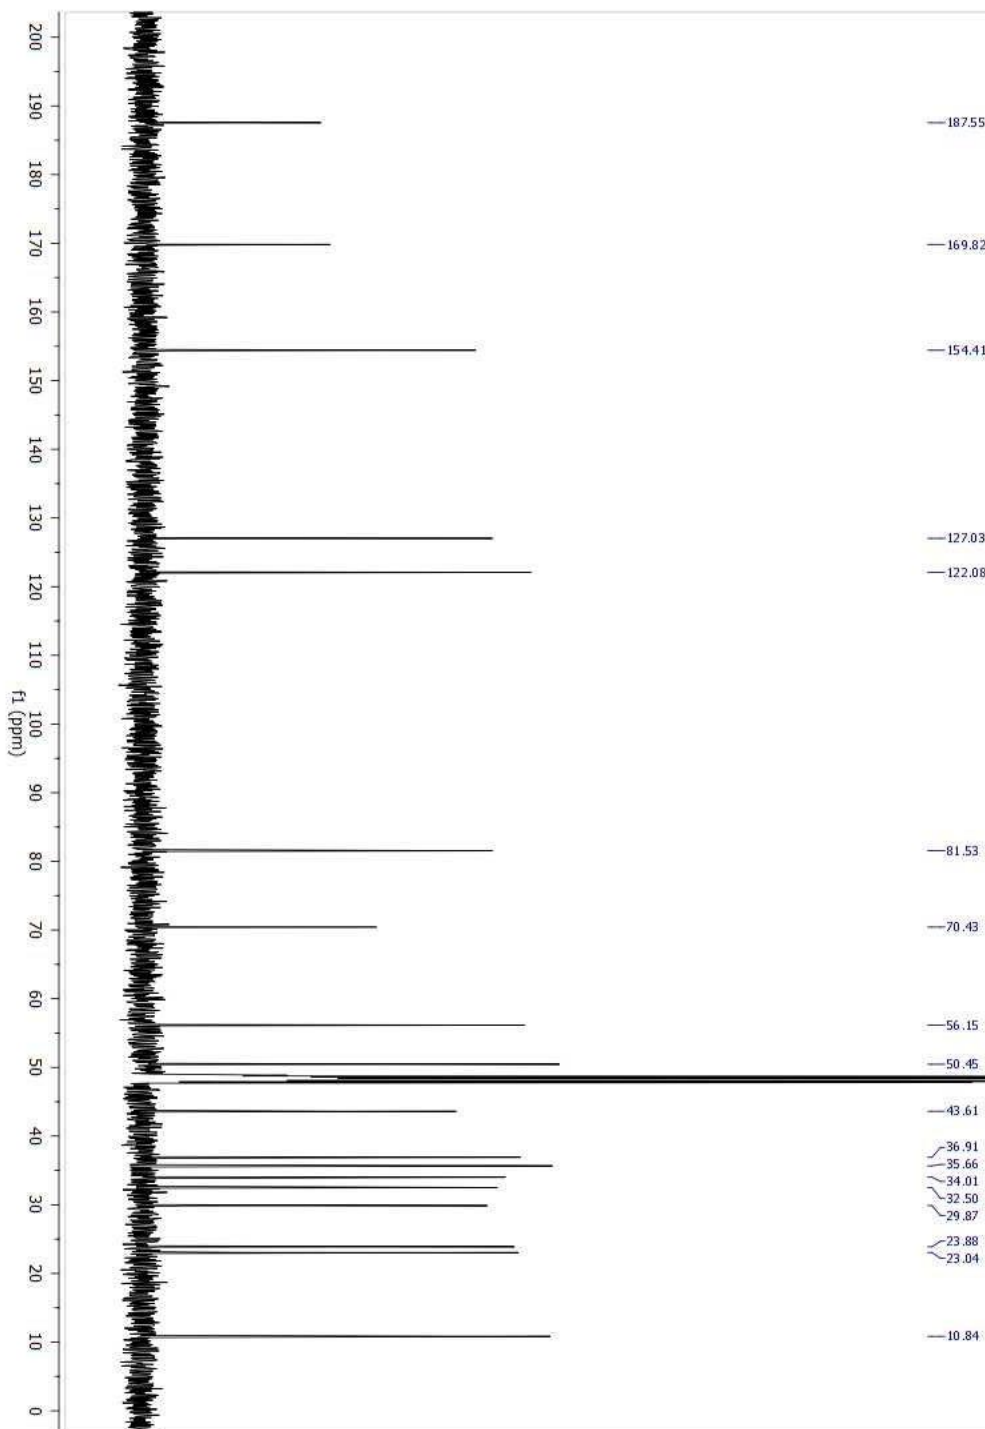

$^{13}\text{C}$  NMR spectrum (125 MHz, Methanol- $d_4$ ) of compound **2b**

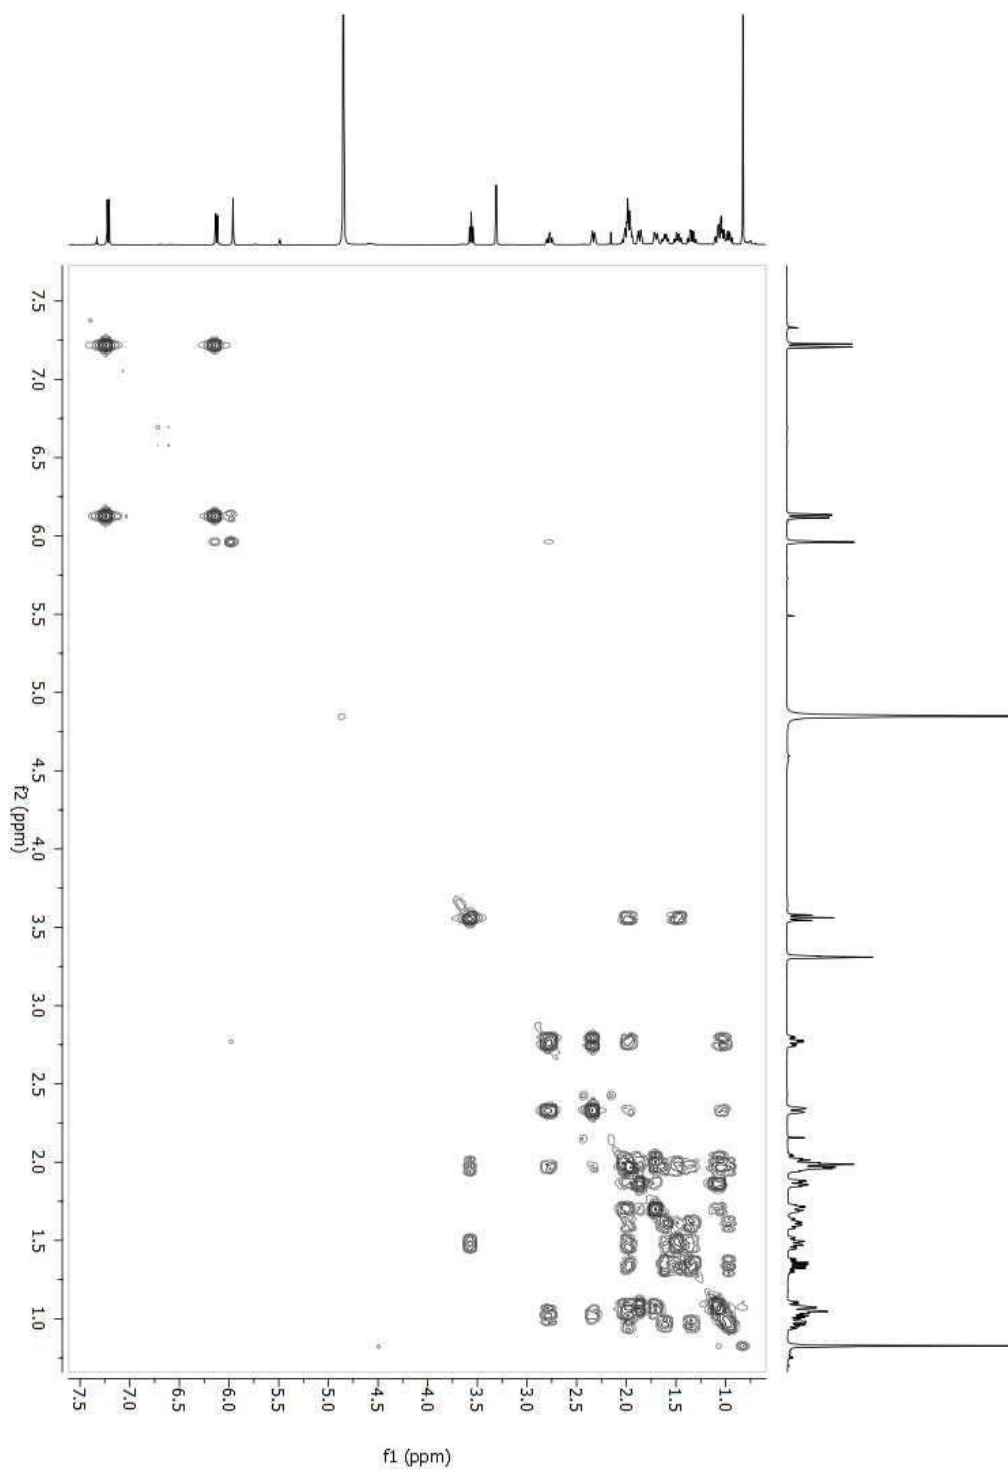

COSY spectrum of compound **2b**(Methanol- $d_4$ )

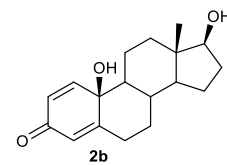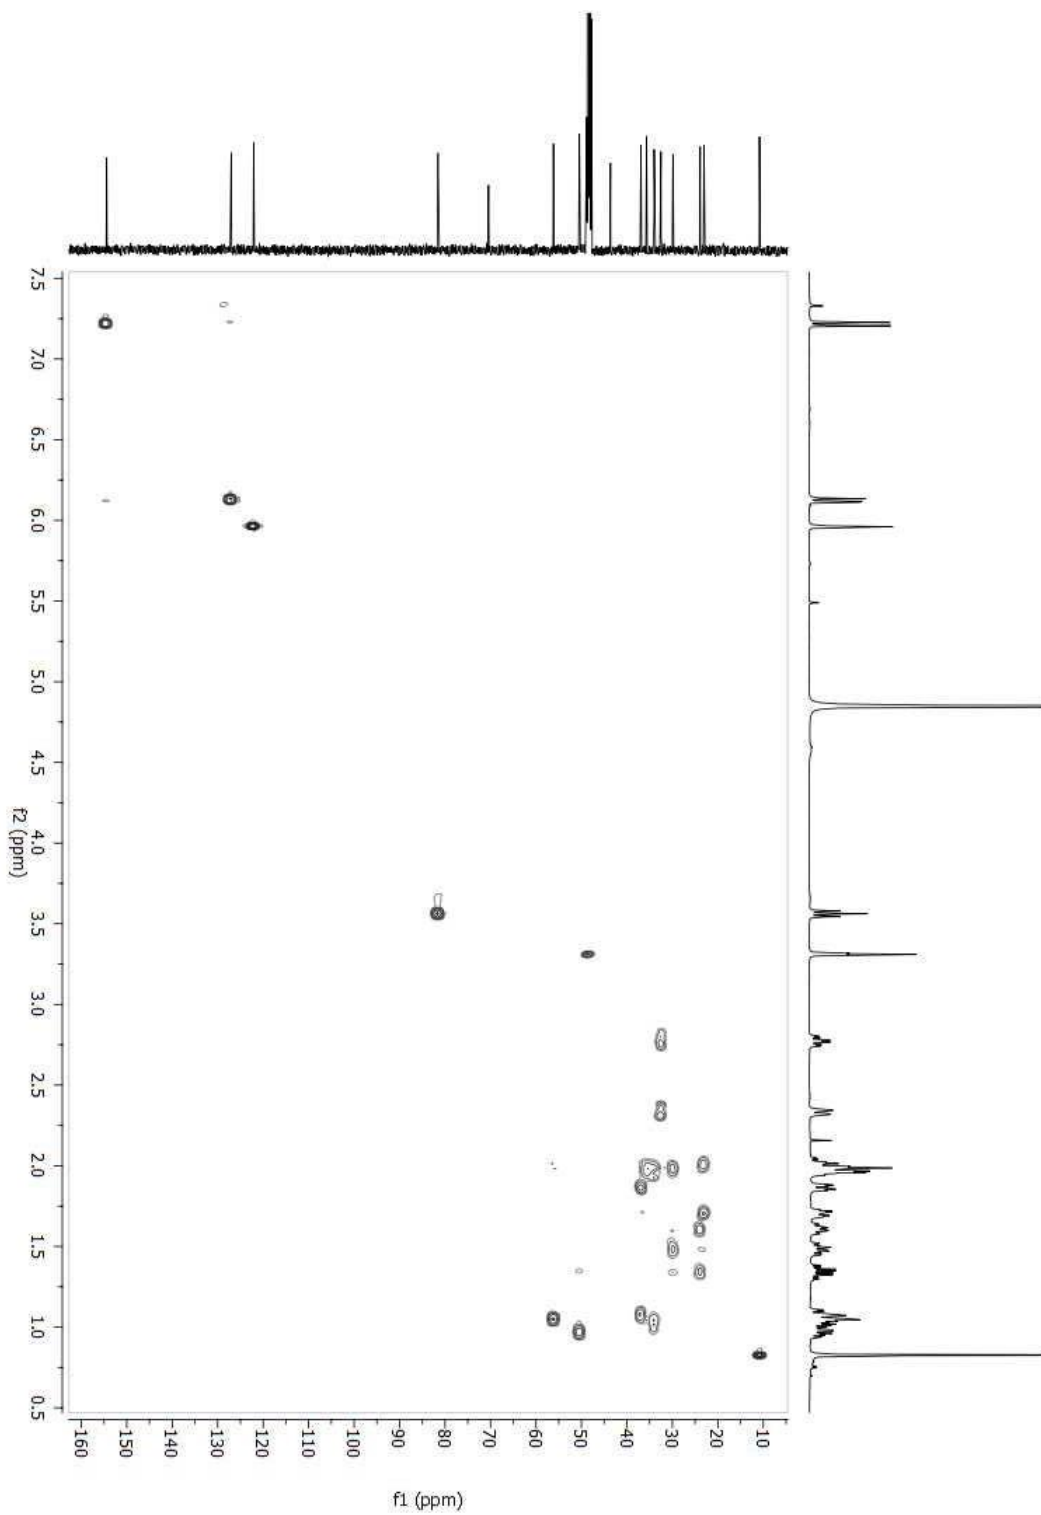

HSQC spectrum of compound **2b**(Methanol- $d_4$ )



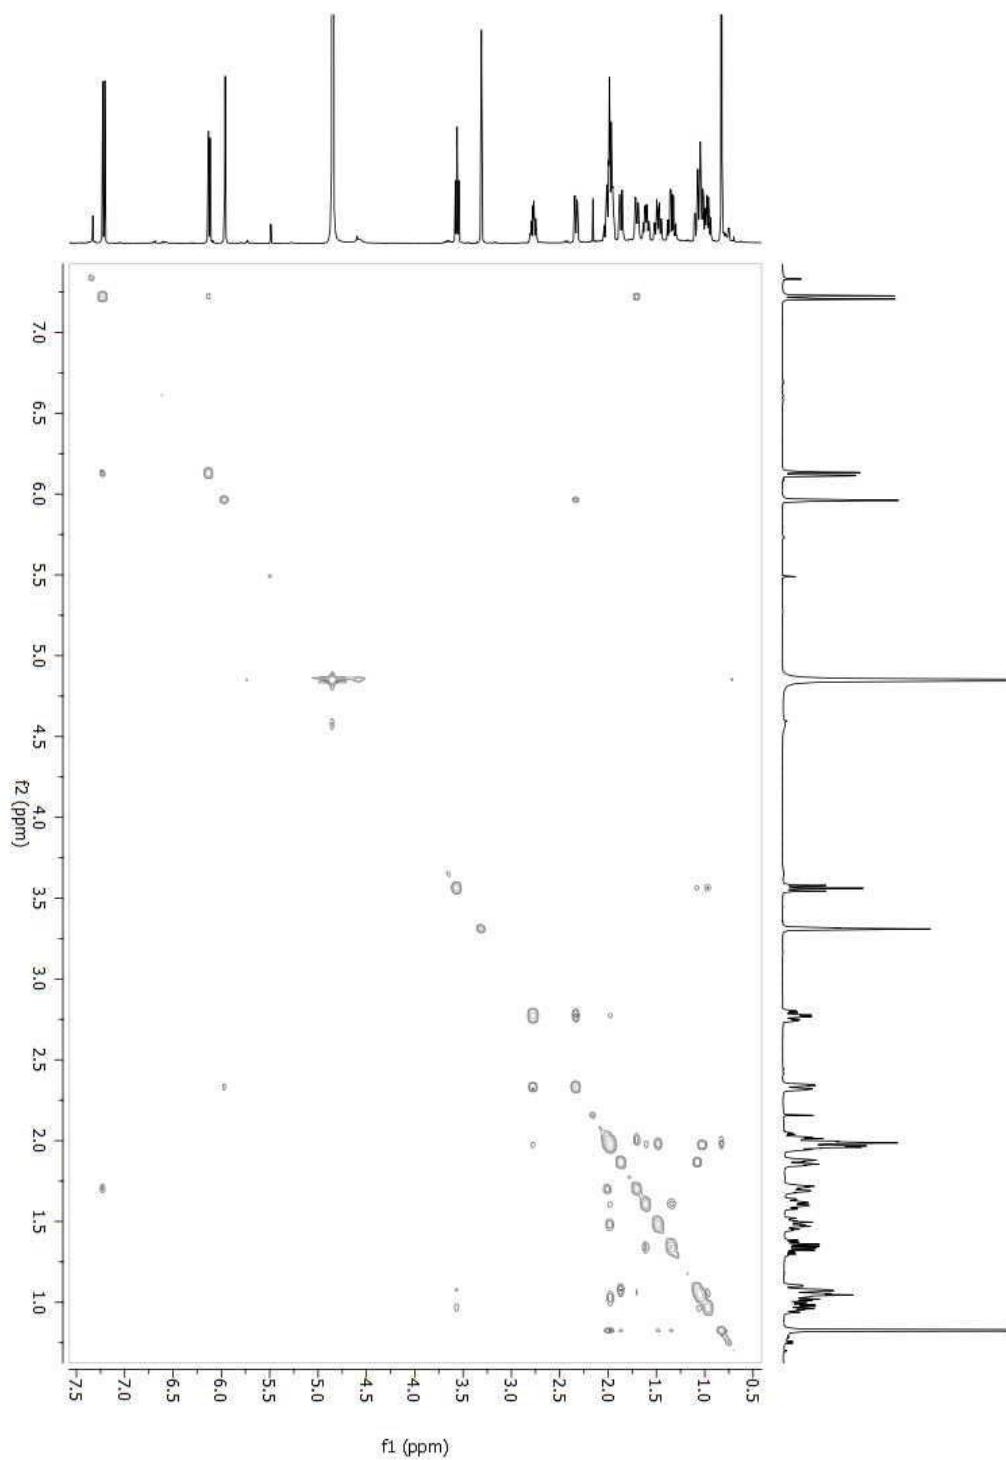

NOESY spectrum of compound **2b** (Methanol- $d_4$ )

### 3.2. Spectra of compound **2d**

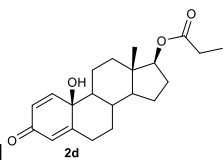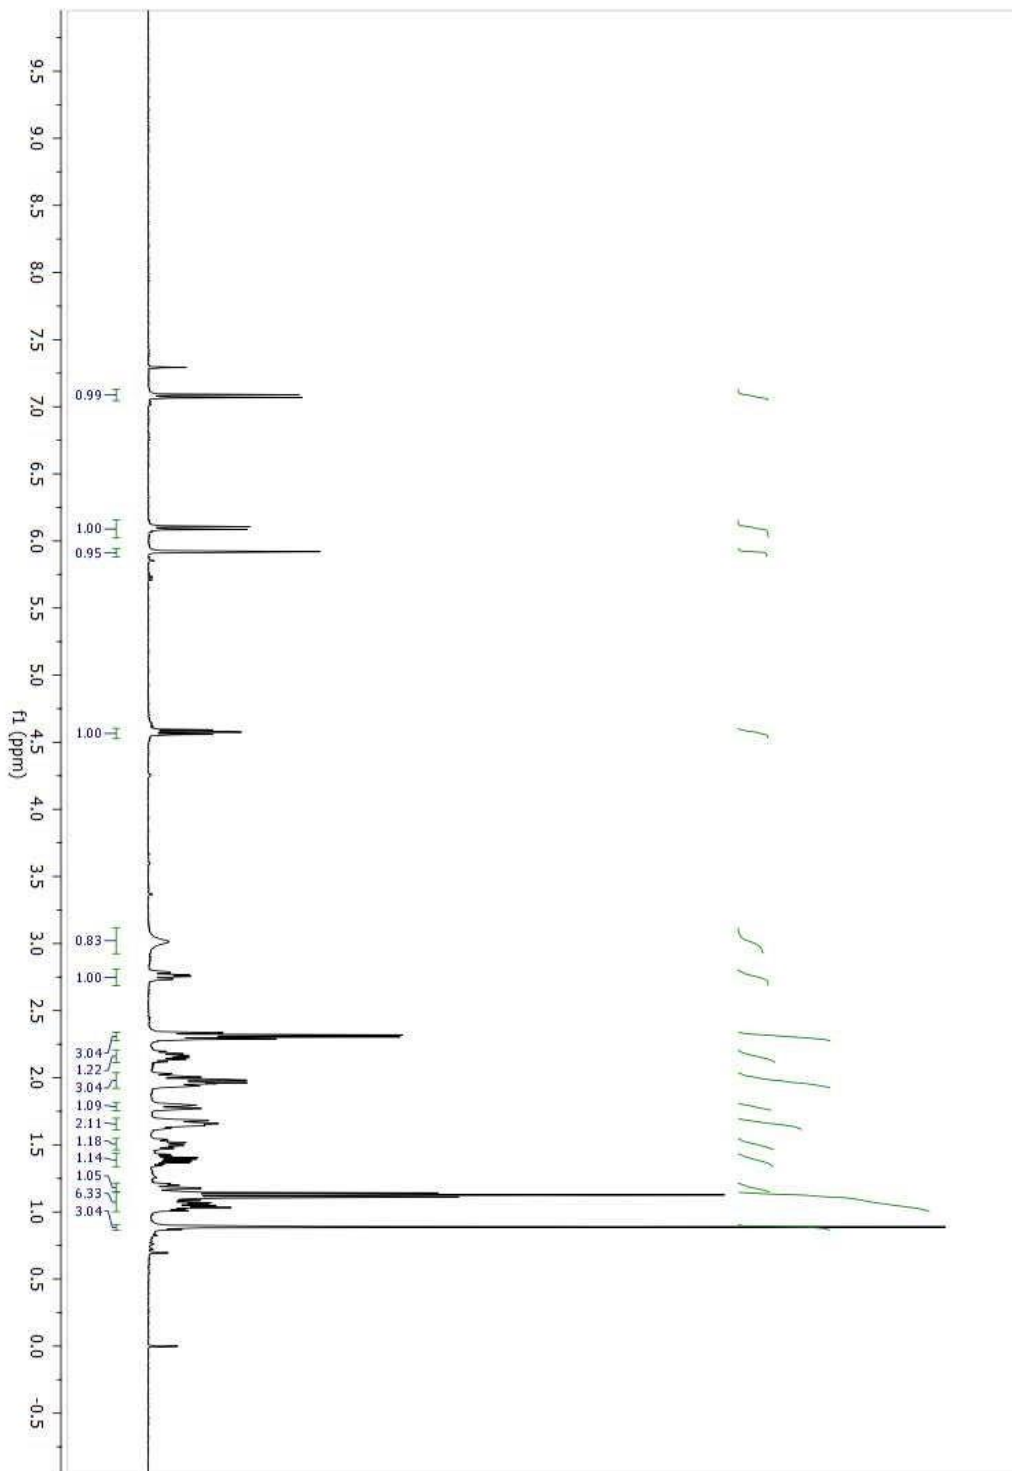

<sup>1</sup>H NMR spectrum of compound **2d** (500 MHz, CDCl<sub>3</sub>)



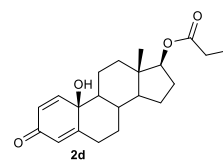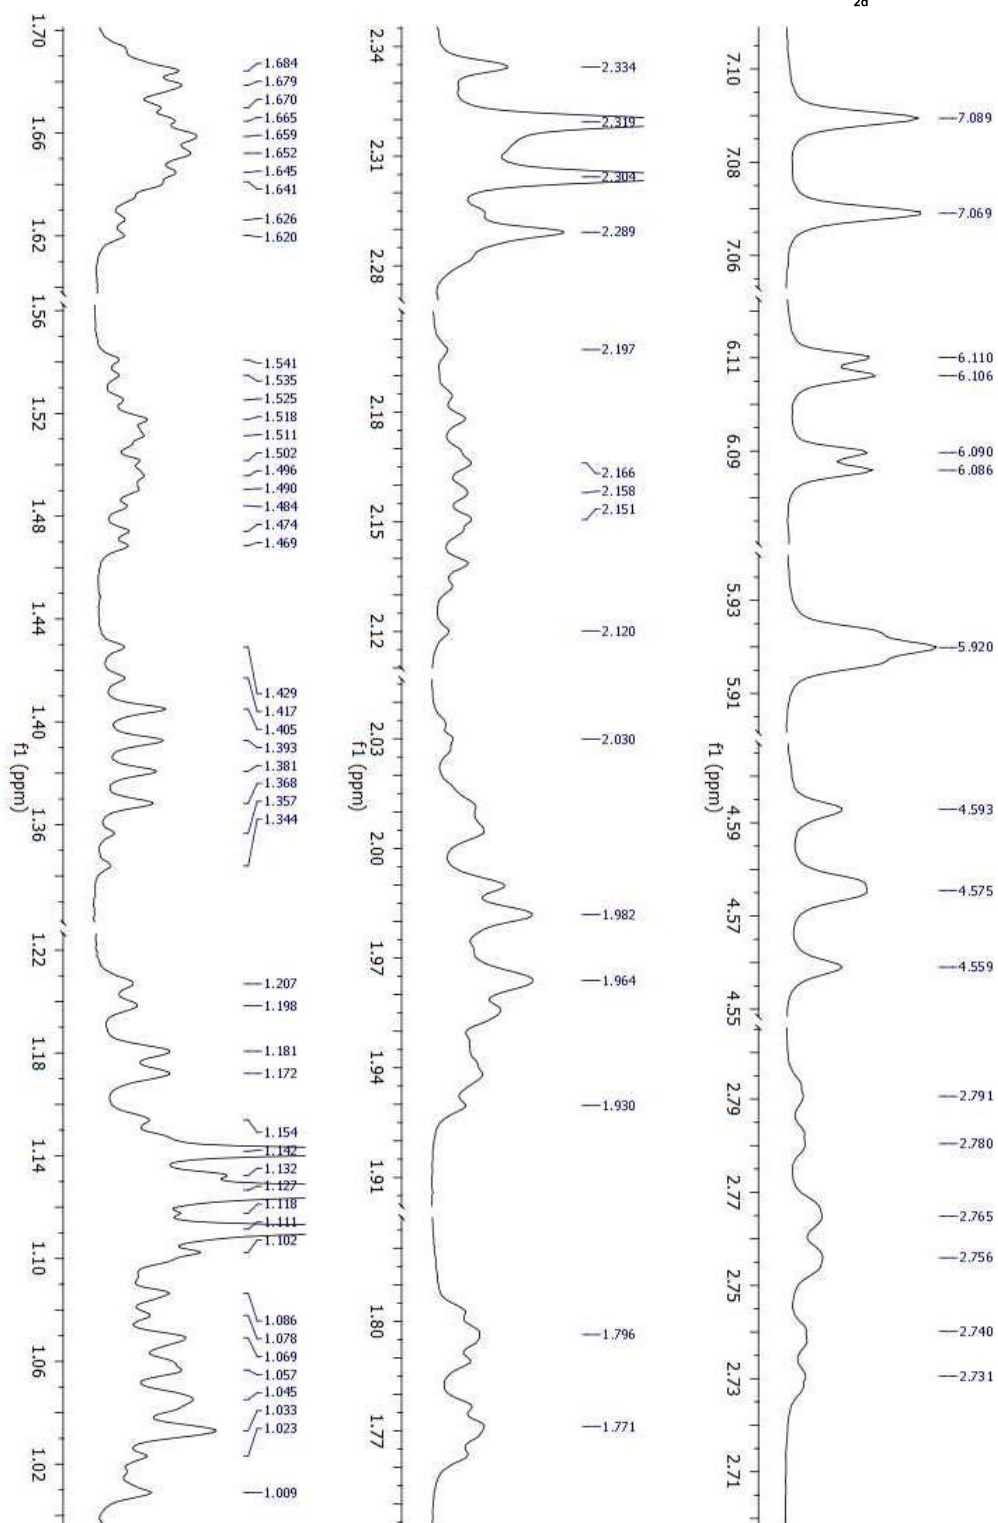

<sup>1</sup>H NMR spectrum of compound **2d** (500 MHz, CDCl<sub>3</sub>)

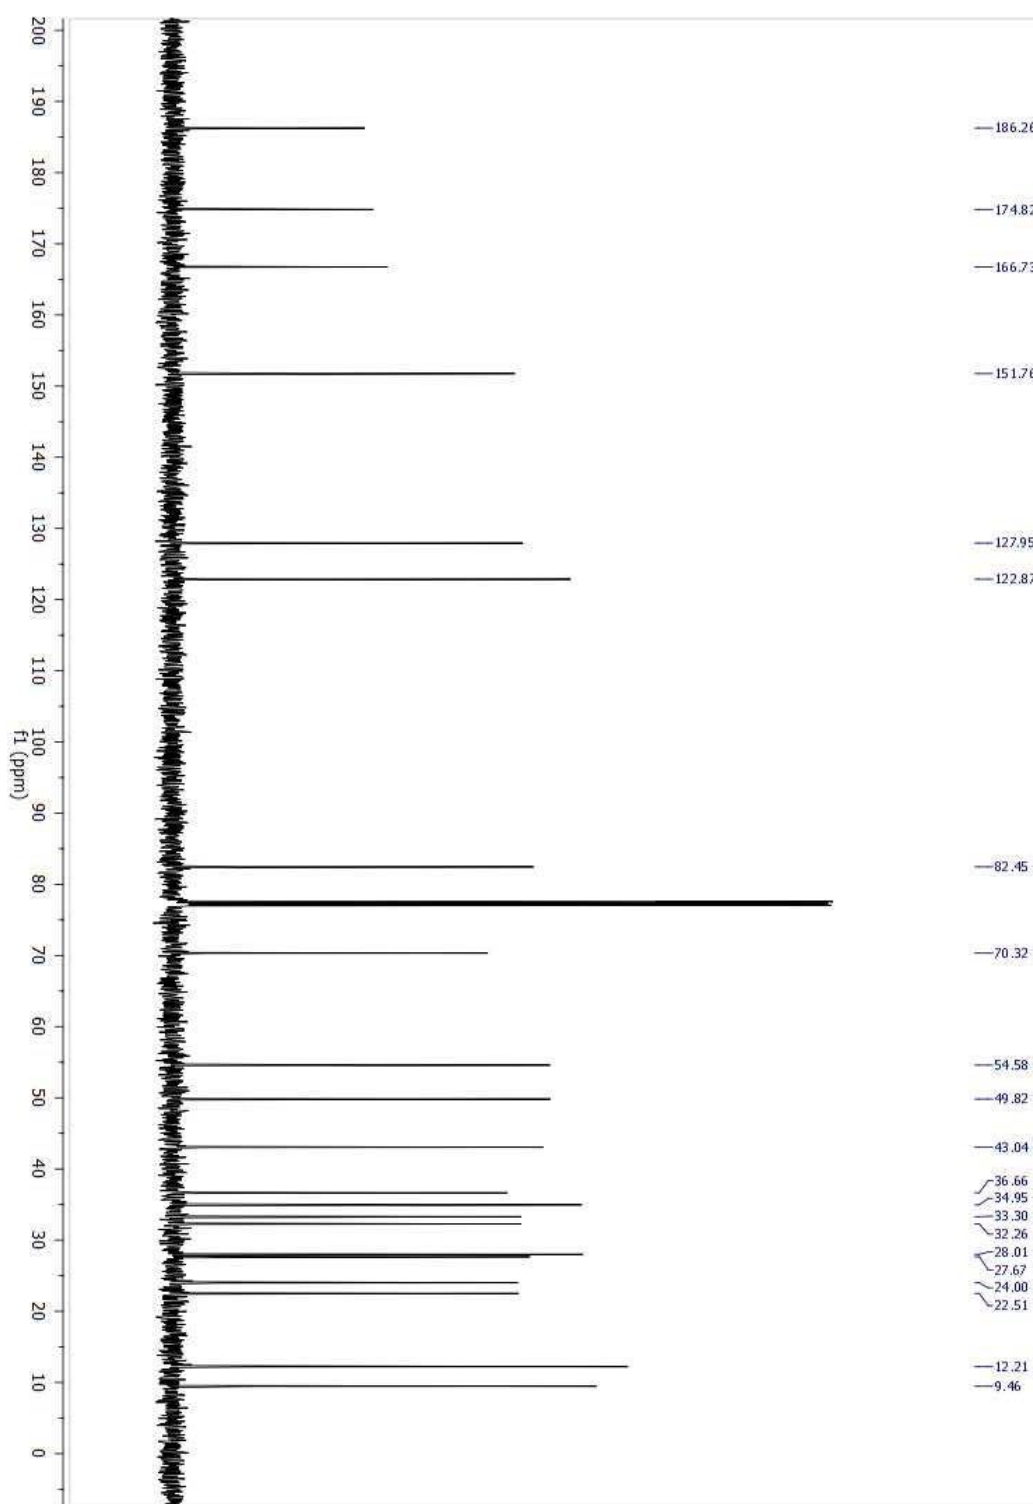

$^{13}\text{C}$  NMR spectrum of compound **2d** (125 MHz,  $\text{CDCl}_3$ )

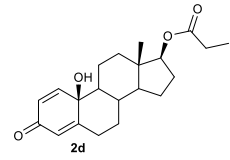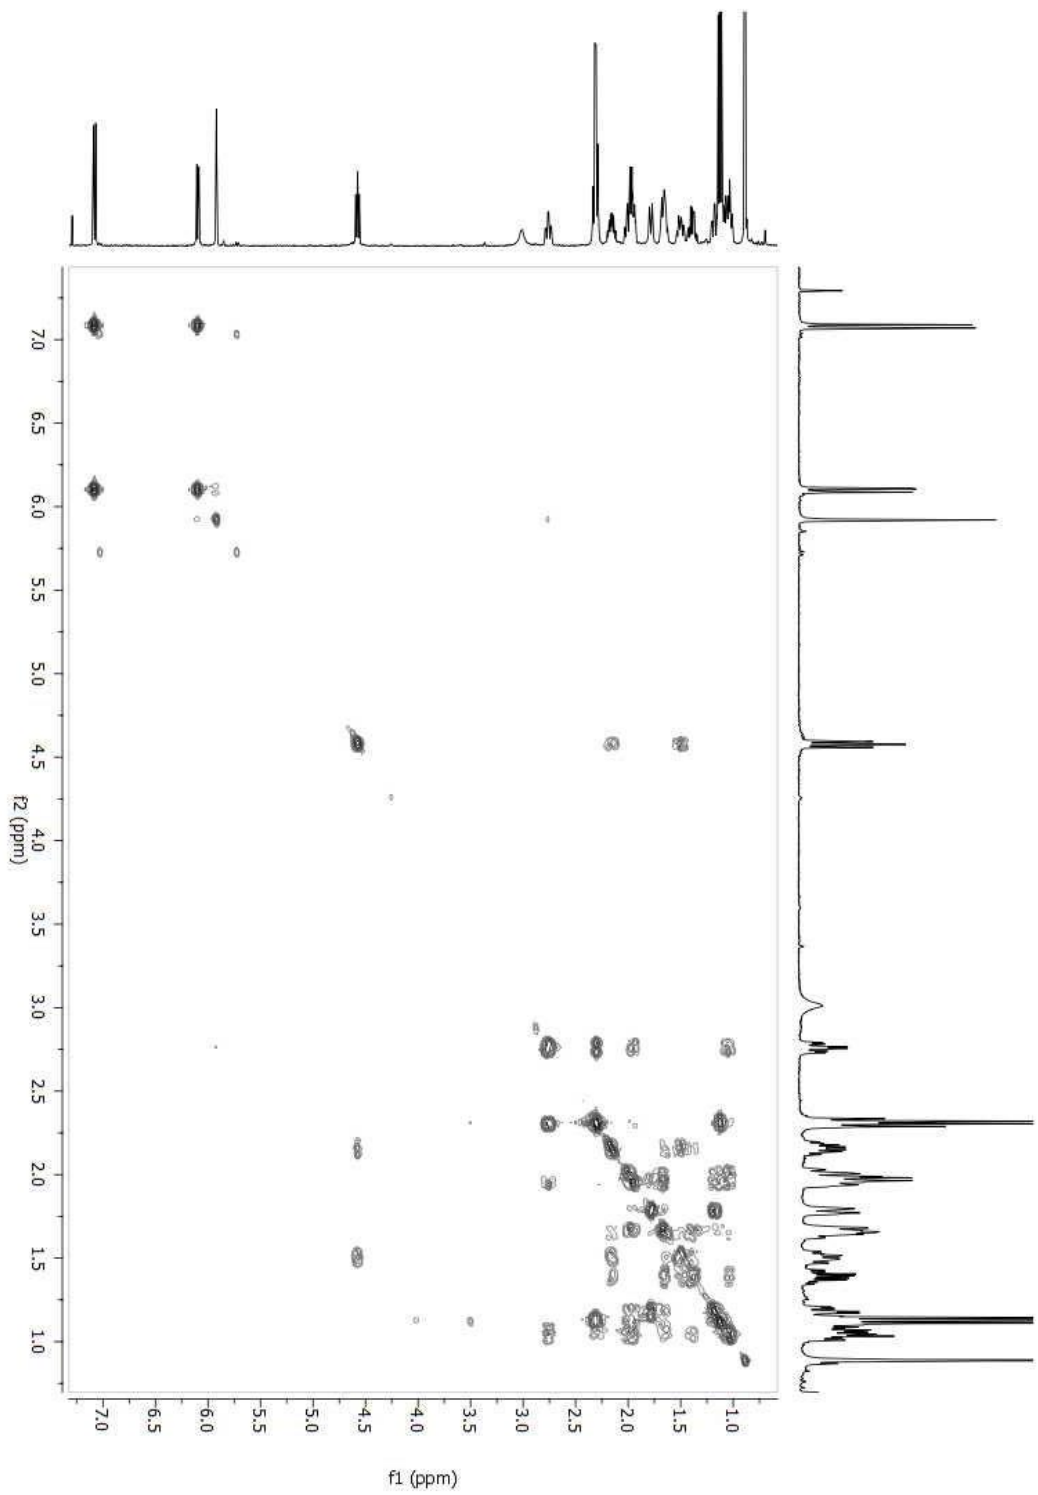

COSY spectrum of compound **2d**(CDCl<sub>3</sub>)

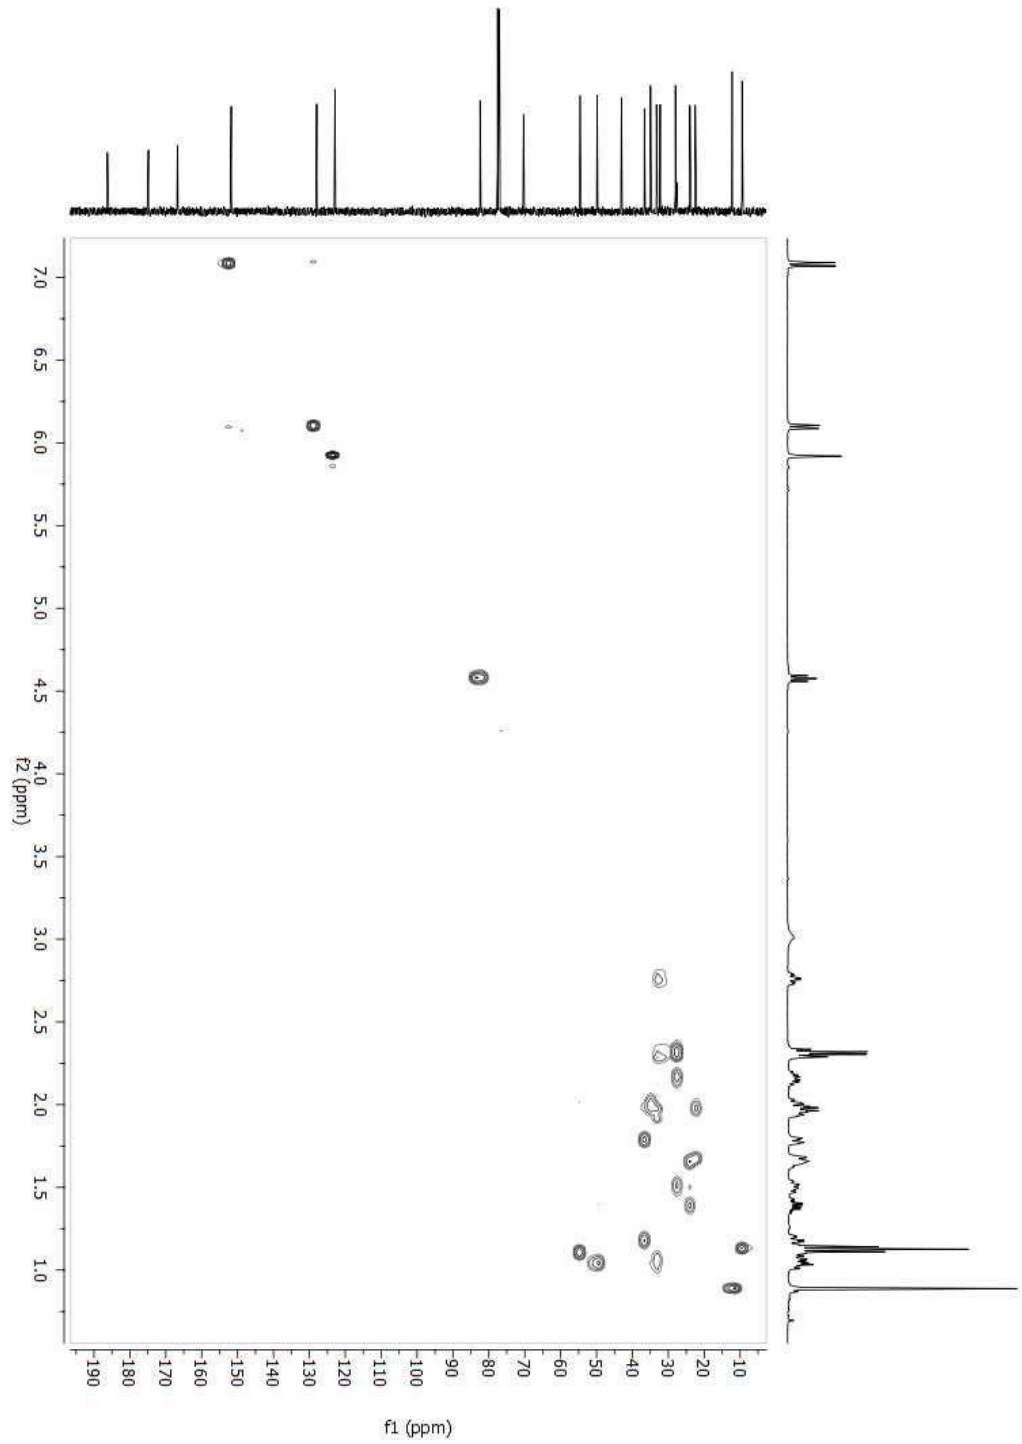

HSQC spectrum of compound **2d** ( $\text{CDCl}_3$ )

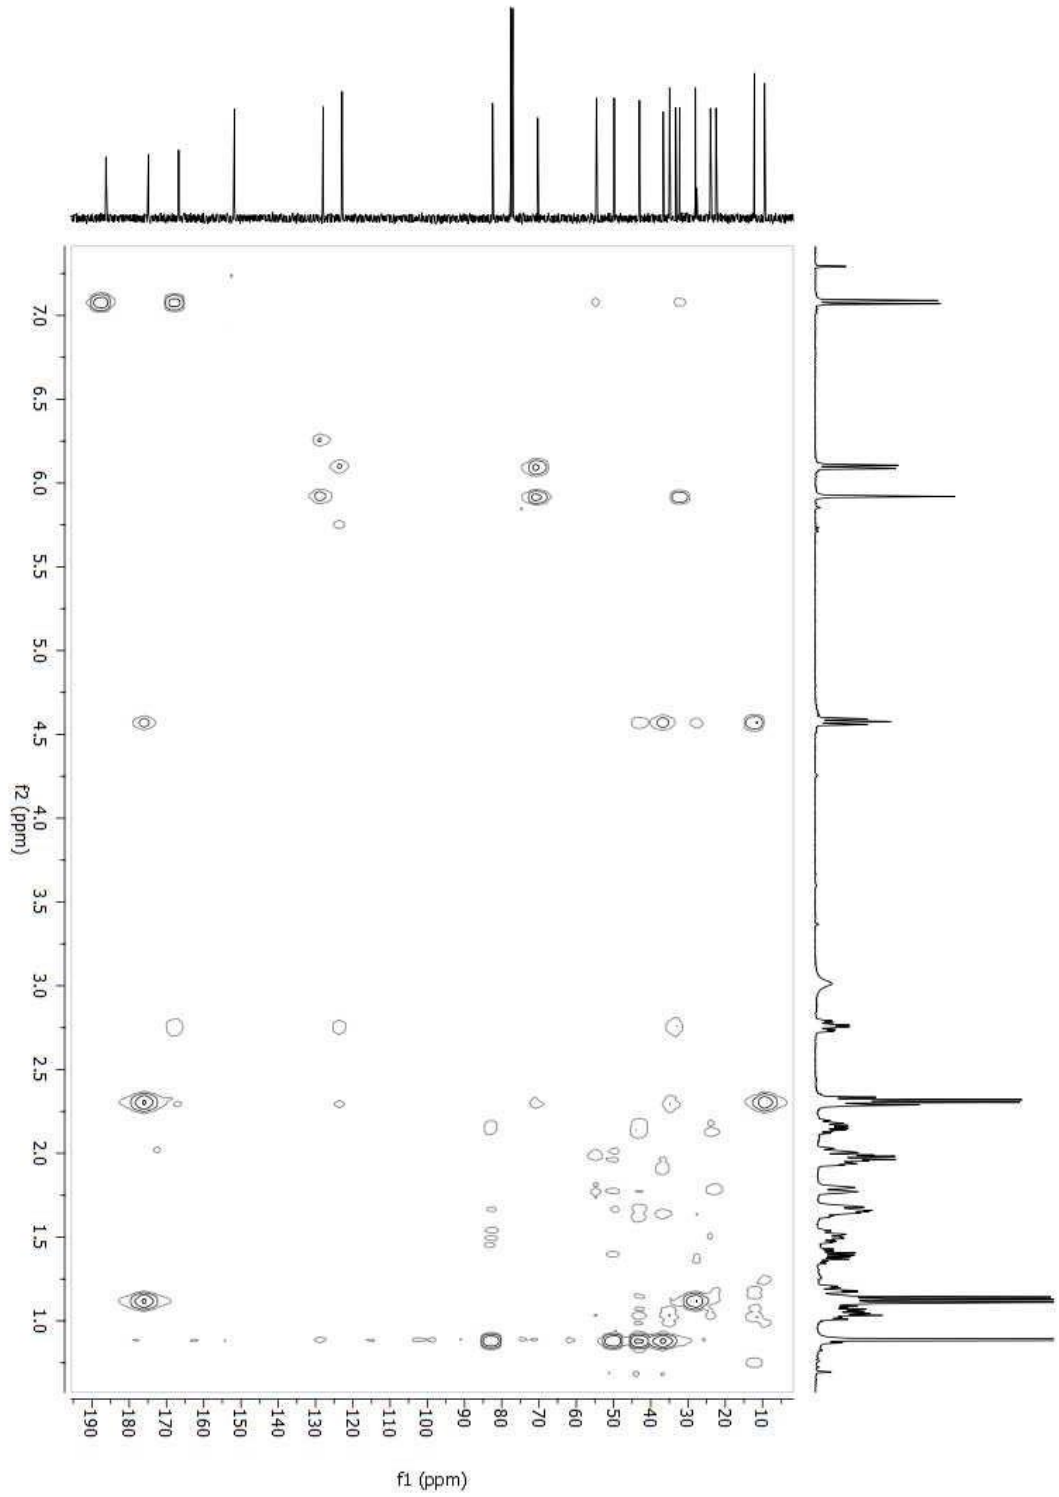

HMBC spectrum of compound **2d**(CDCl<sub>3</sub>)

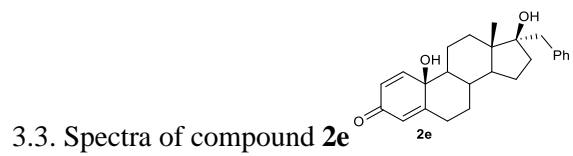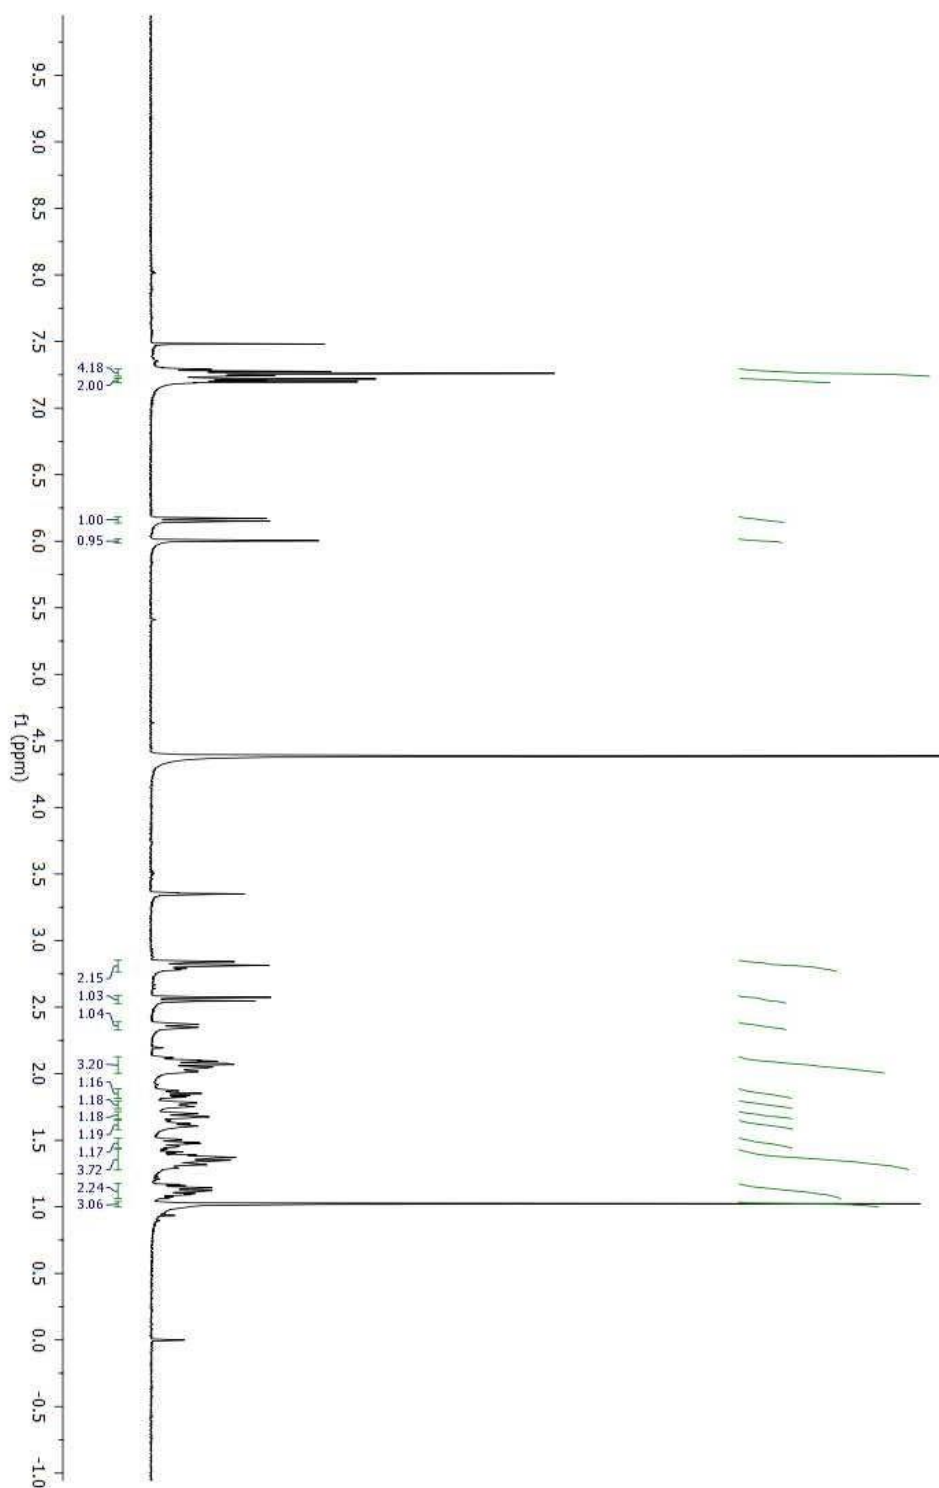

<sup>1</sup>H NMR spectrum of compound **2e** (500 MHz, CDCl<sub>3</sub>)



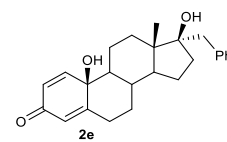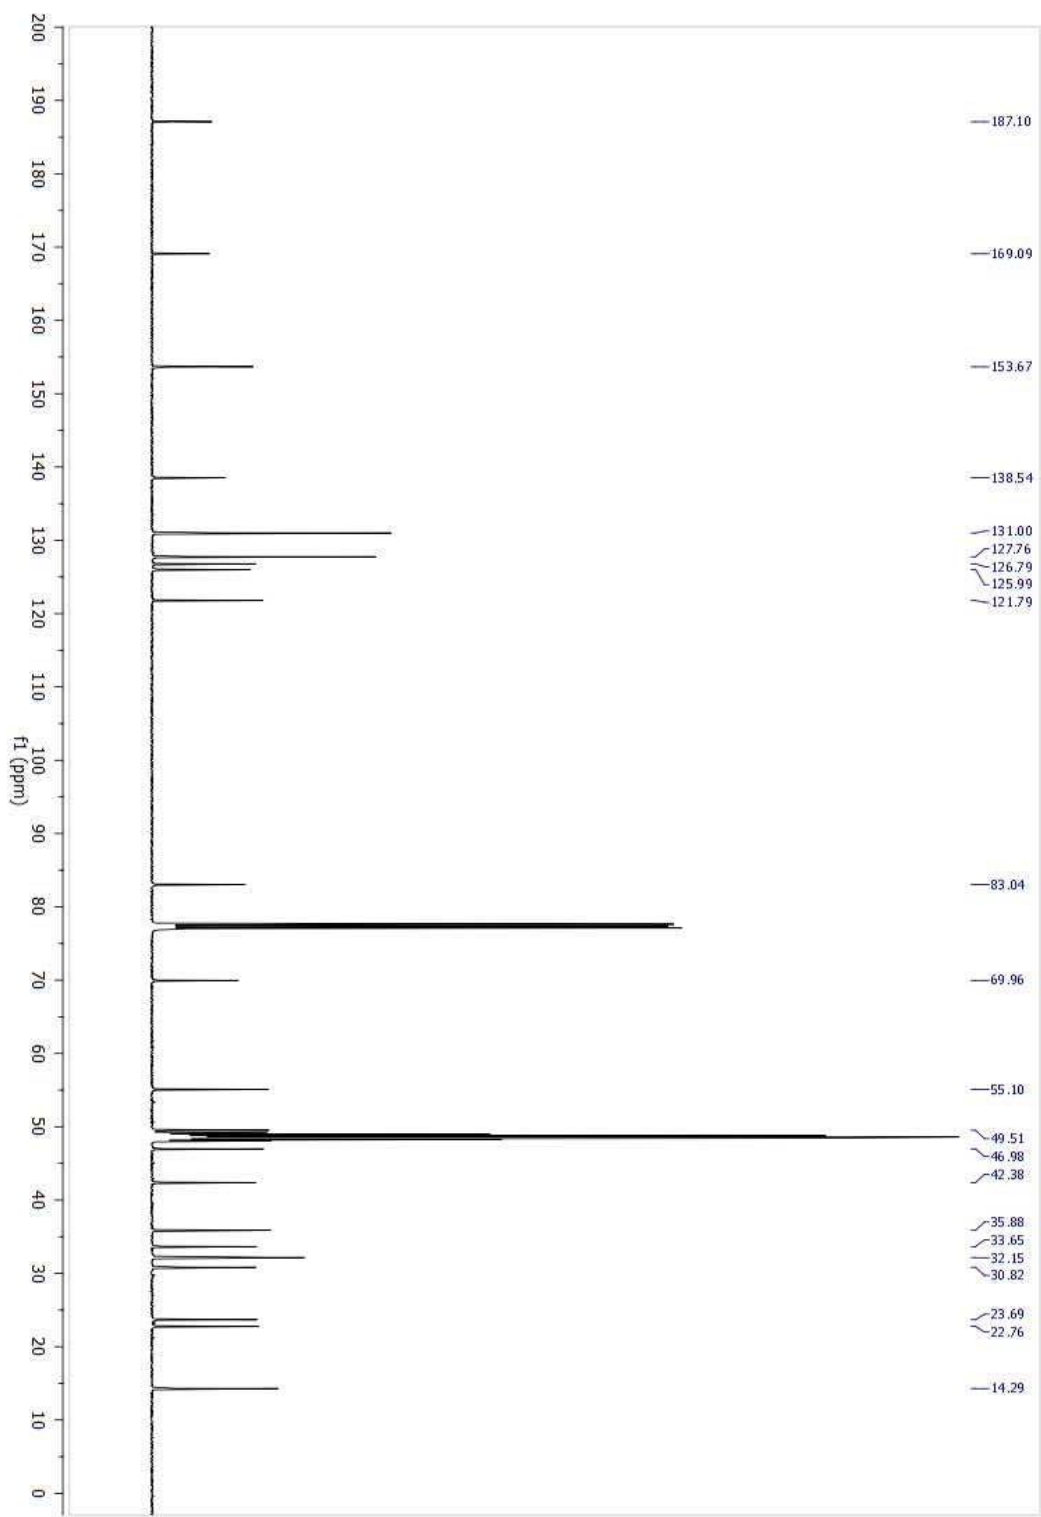

$^{13}\text{C}$  NMR spectrum of compound **2e** (125 MHz,  $\text{CDCl}_3$ )



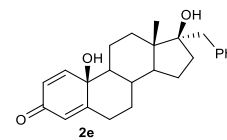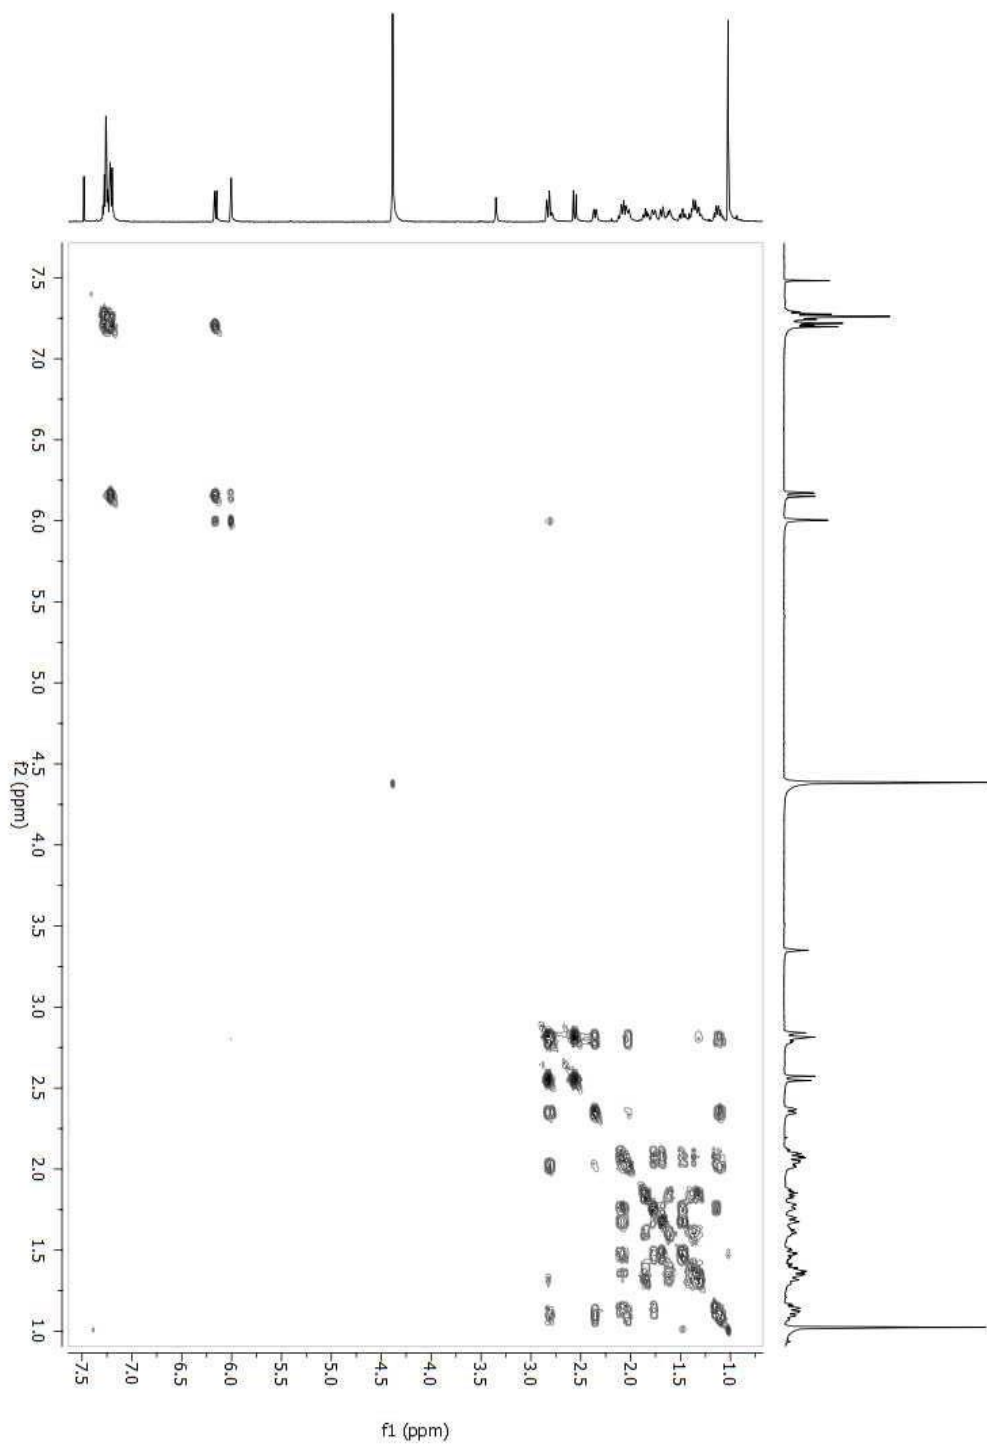

COSY spectrum of compound **2e**(CDCl<sub>3</sub>)

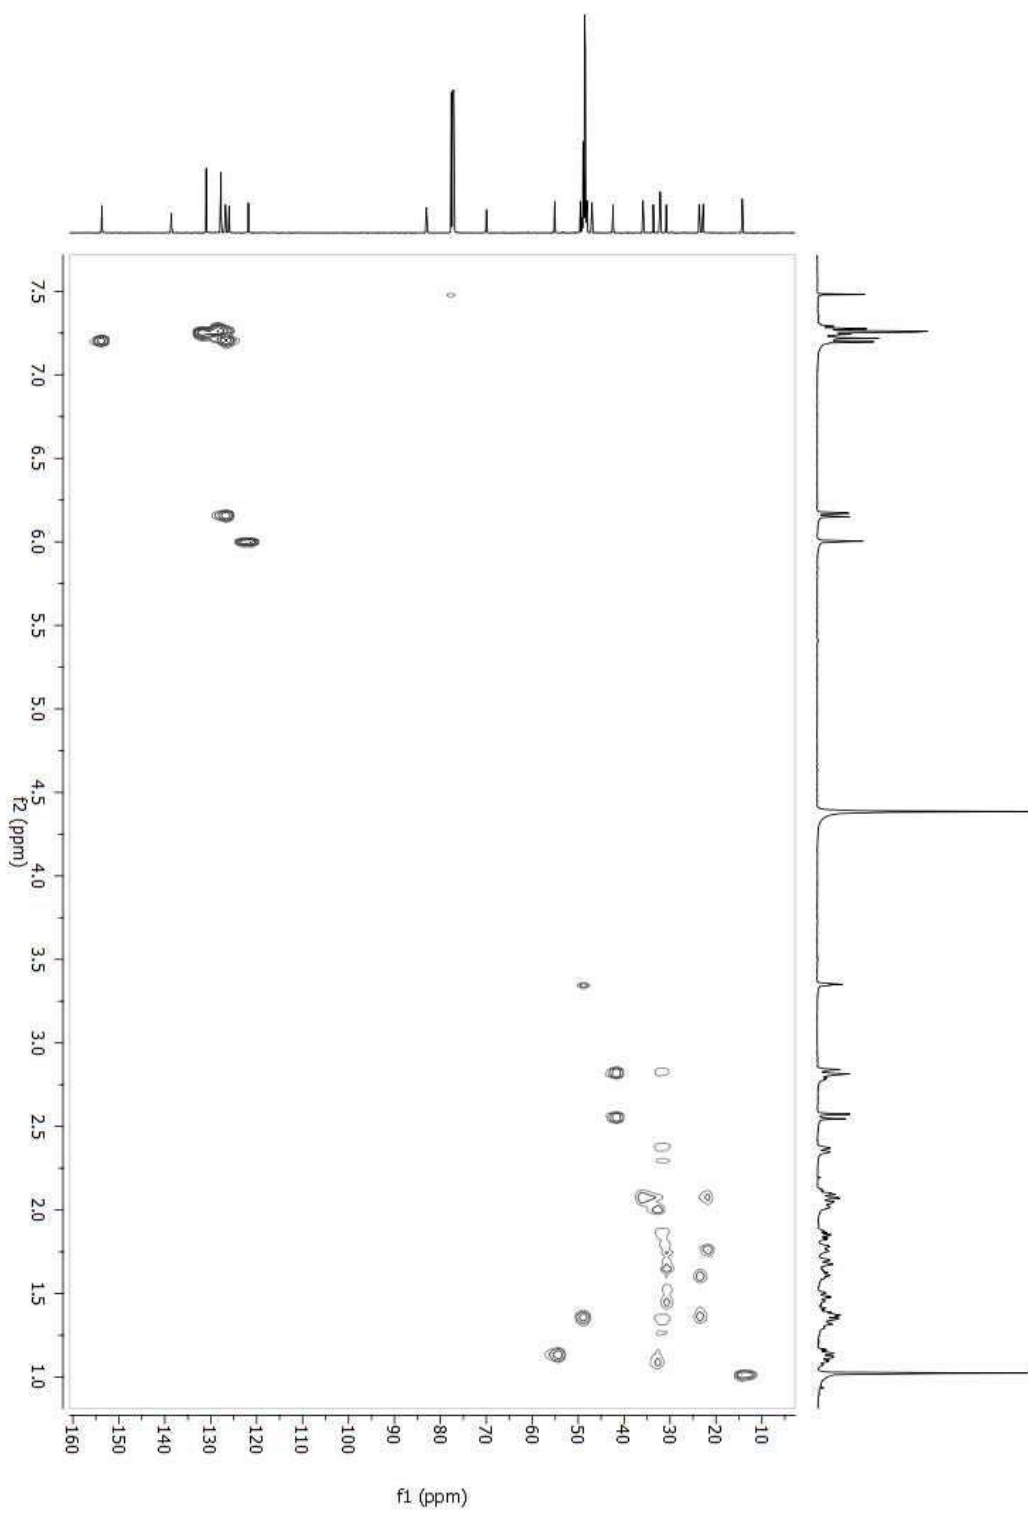

HSQC spectrum of compound 2e( $\text{CDCl}_3$ )

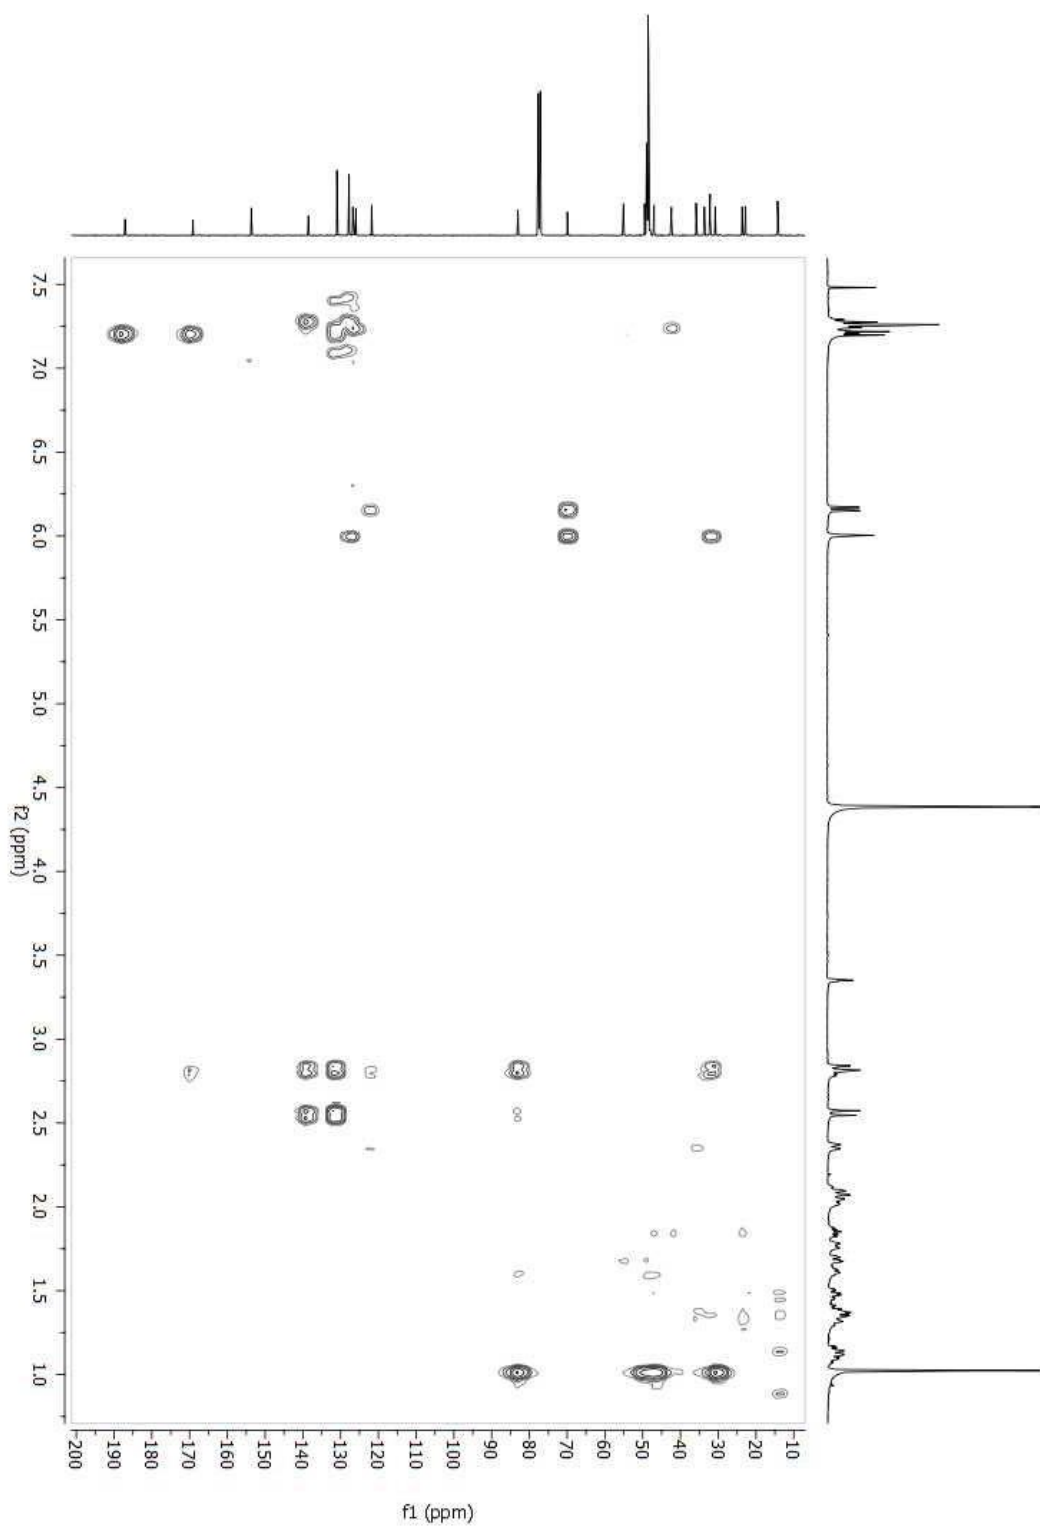

HMBC spectrum of compound **2e**(CDCl<sub>3</sub>)

3.4. Spectra of compound **2f**

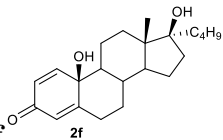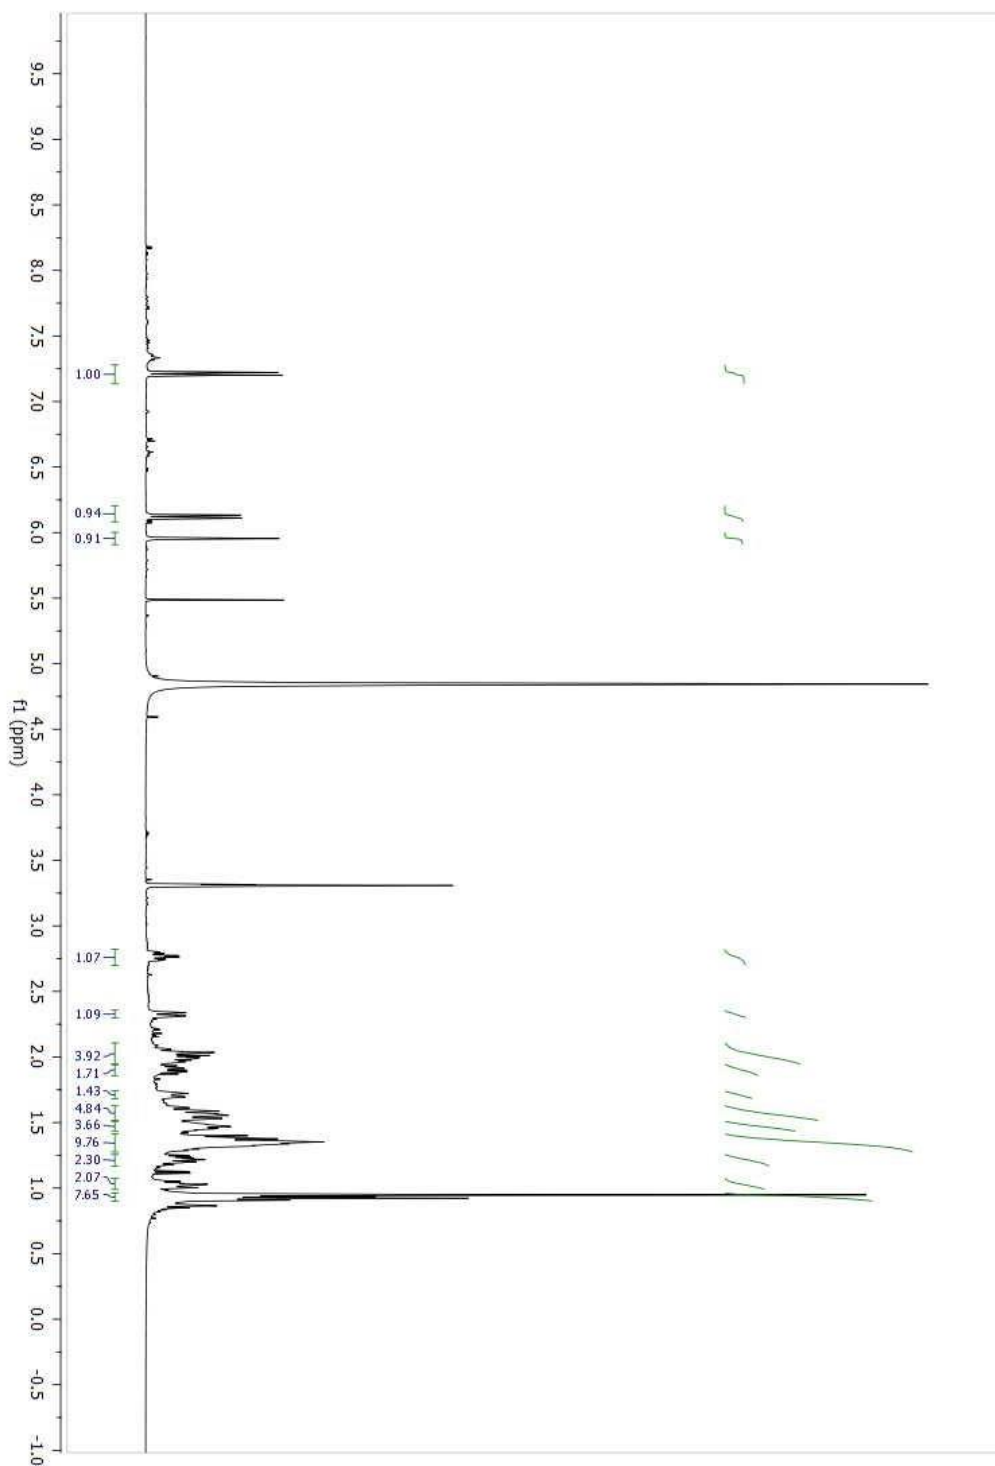

<sup>1</sup>H NMR spectrum of compound **2f**(500 MHz, Methanol-*d*<sub>4</sub>)

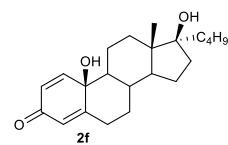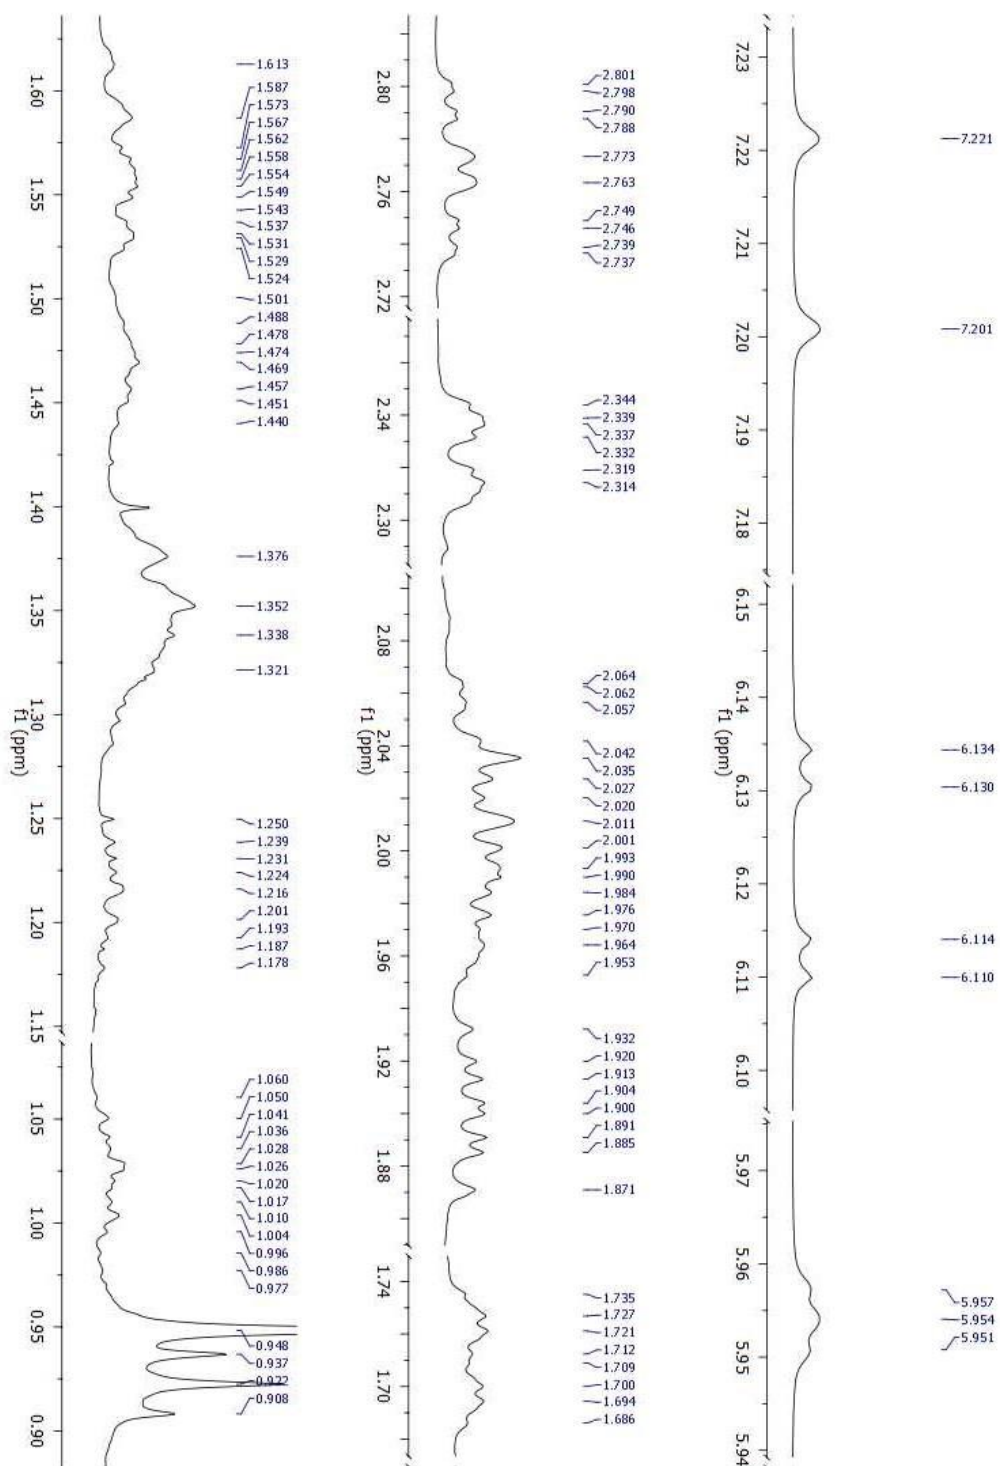

<sup>1</sup>H NMR spectrum of compound **2f** (500 MHz, Methanol-*d*<sub>4</sub>)

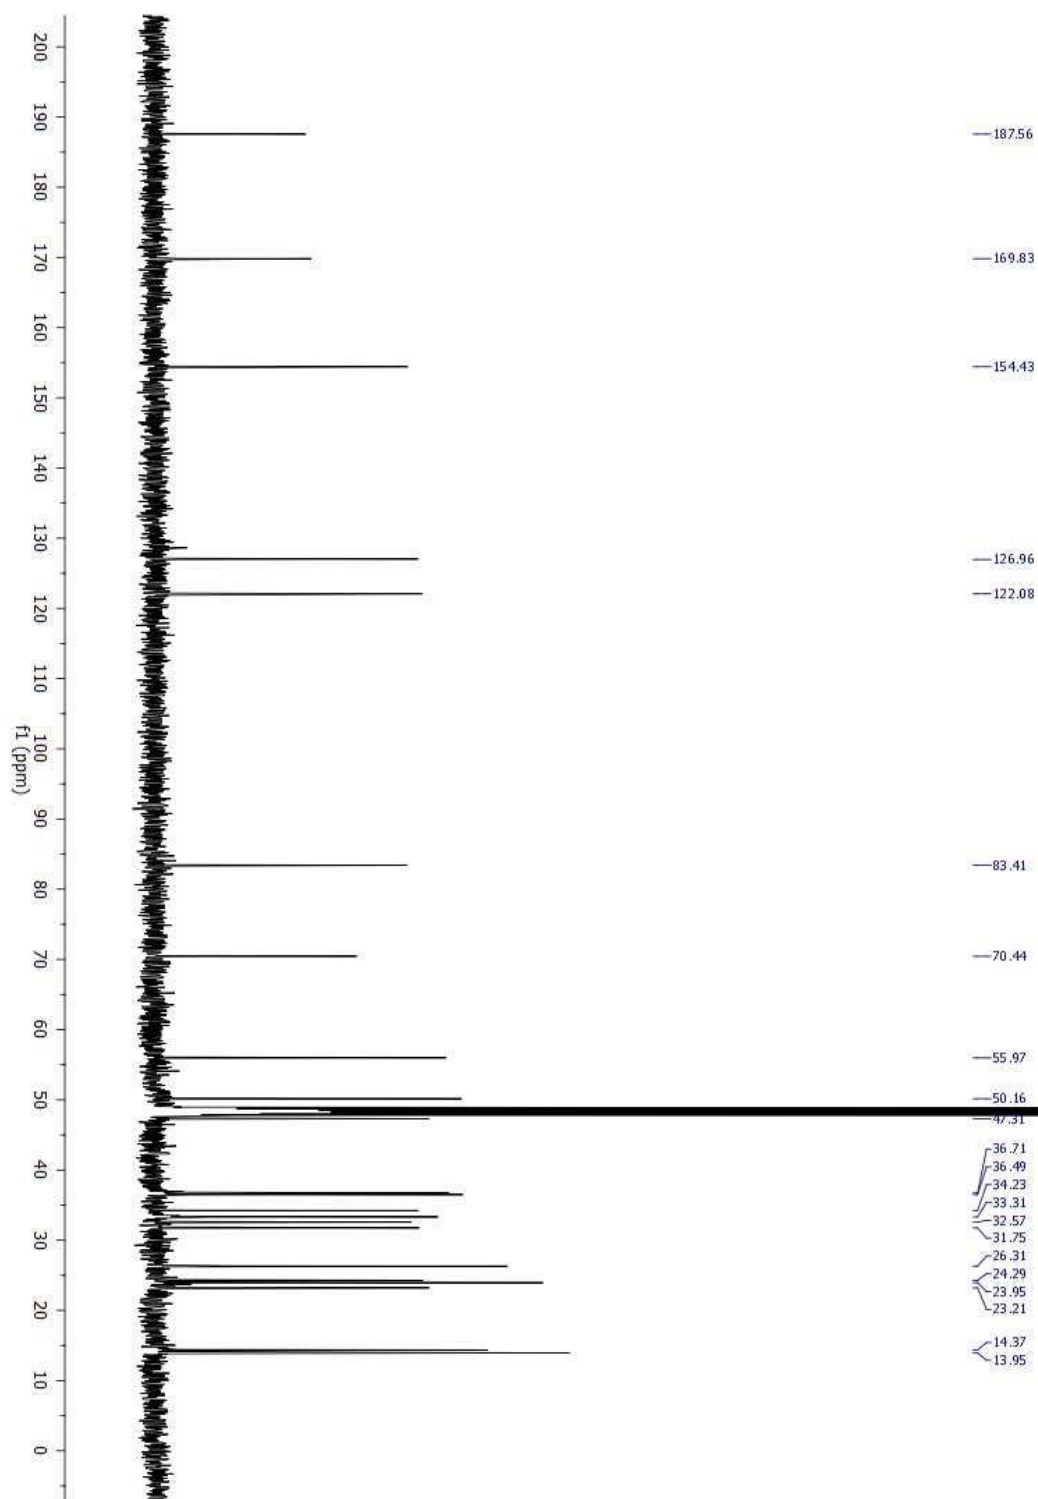

$^{13}C$  NMR spectrum of compound **2f** (125 MHz, Methanol- $d_4$ )

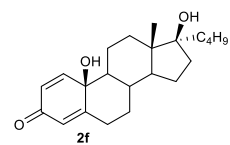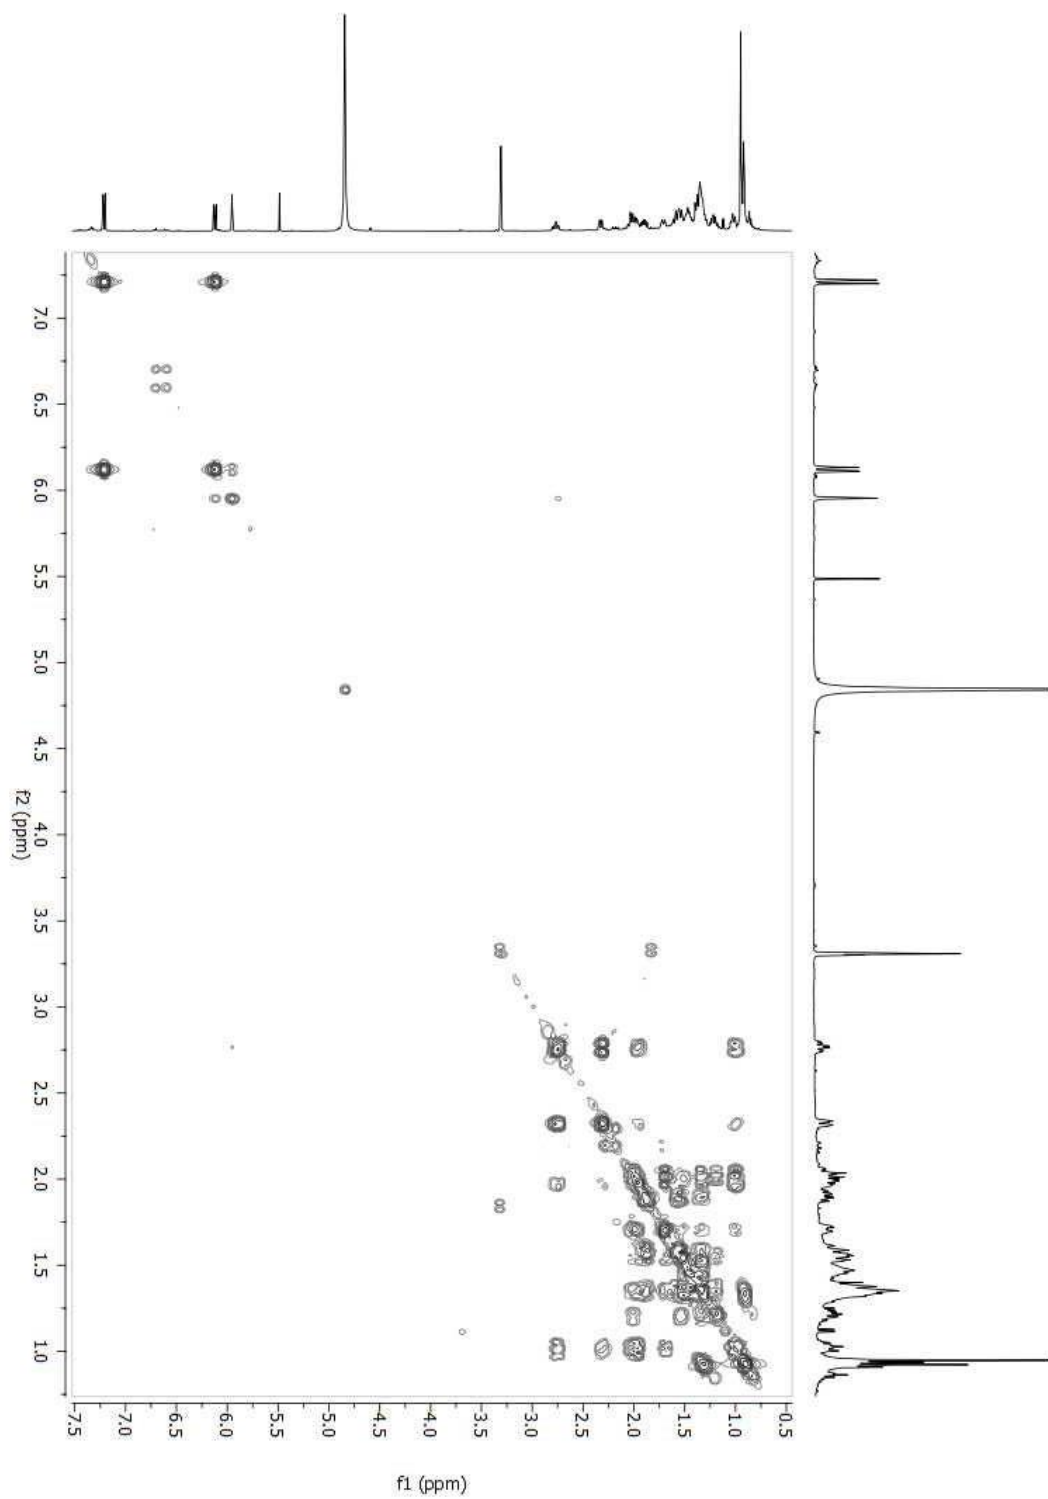

COSY spectrum of compound **2f**(Methanol- $d_4$ )

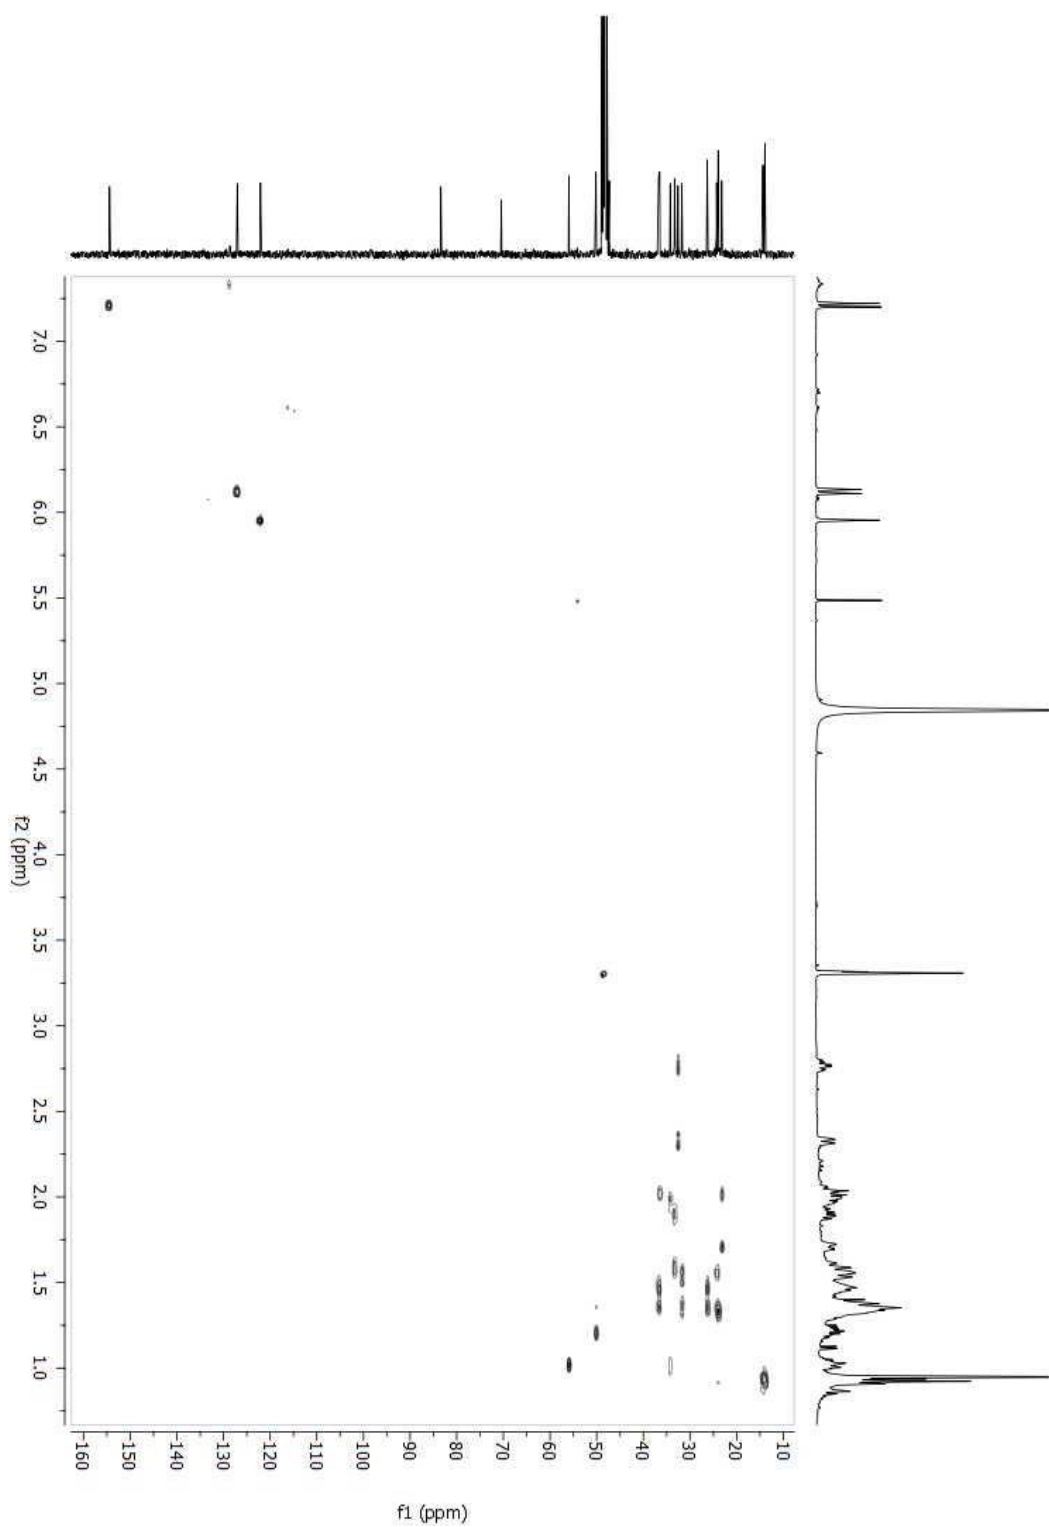

HSQC spectrum of compound 2f(Methanol- $d_4$ )



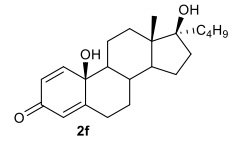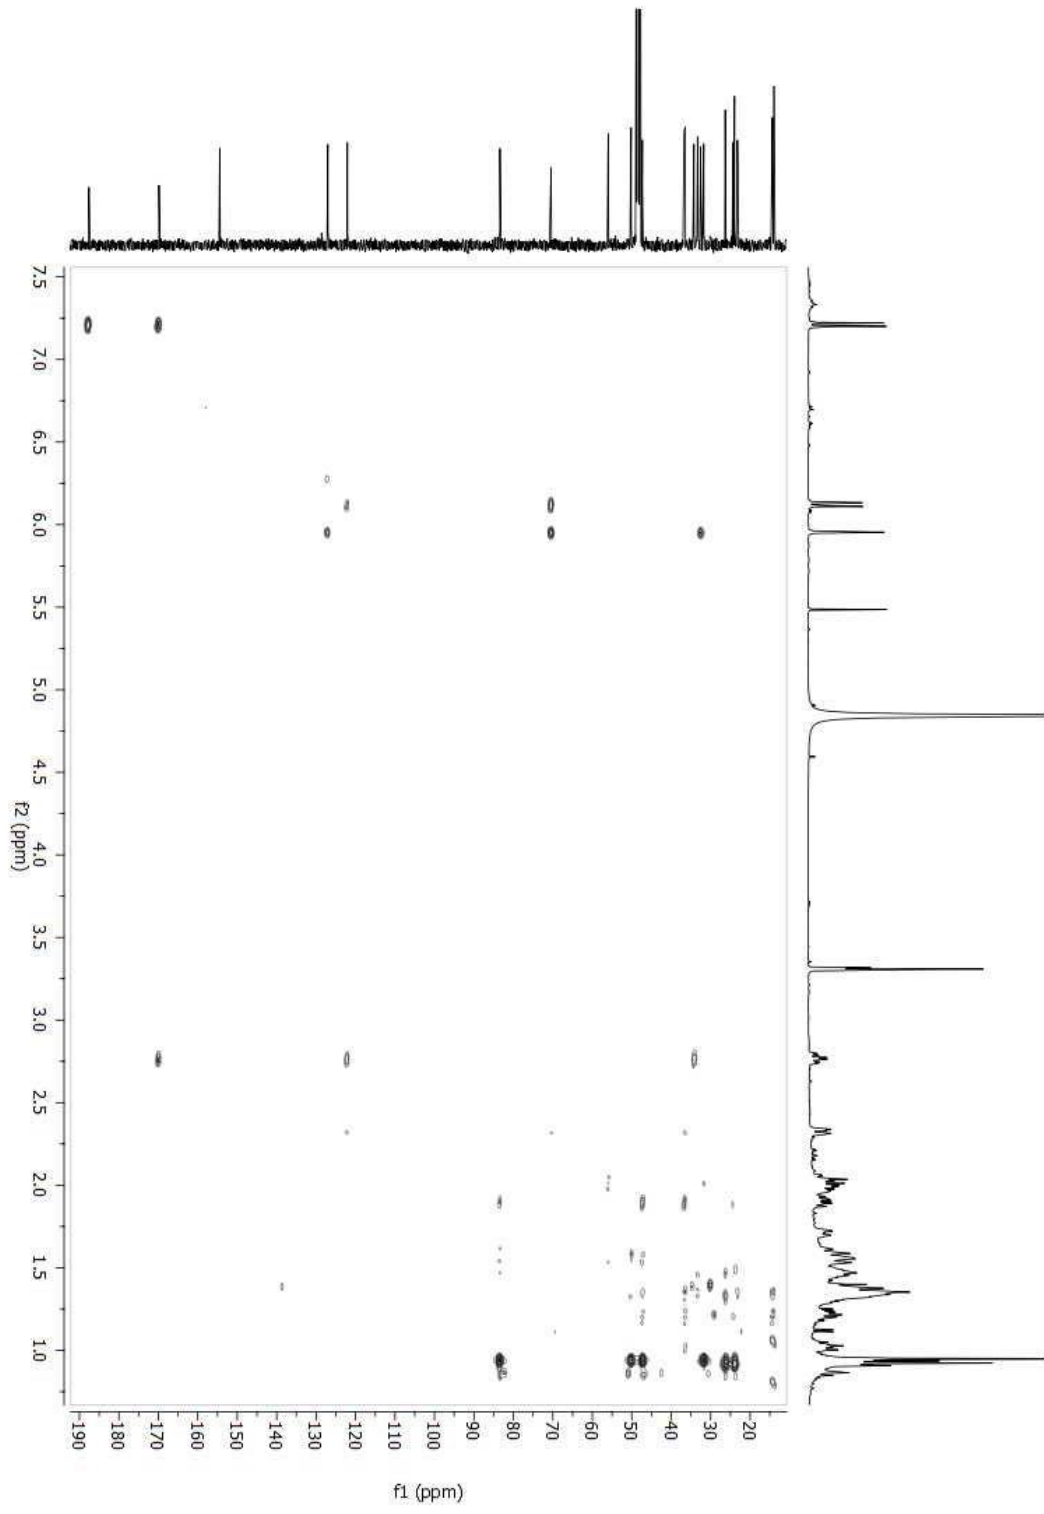

HMBC spectrum of compound **2f**(Methanol- $d_4$ )

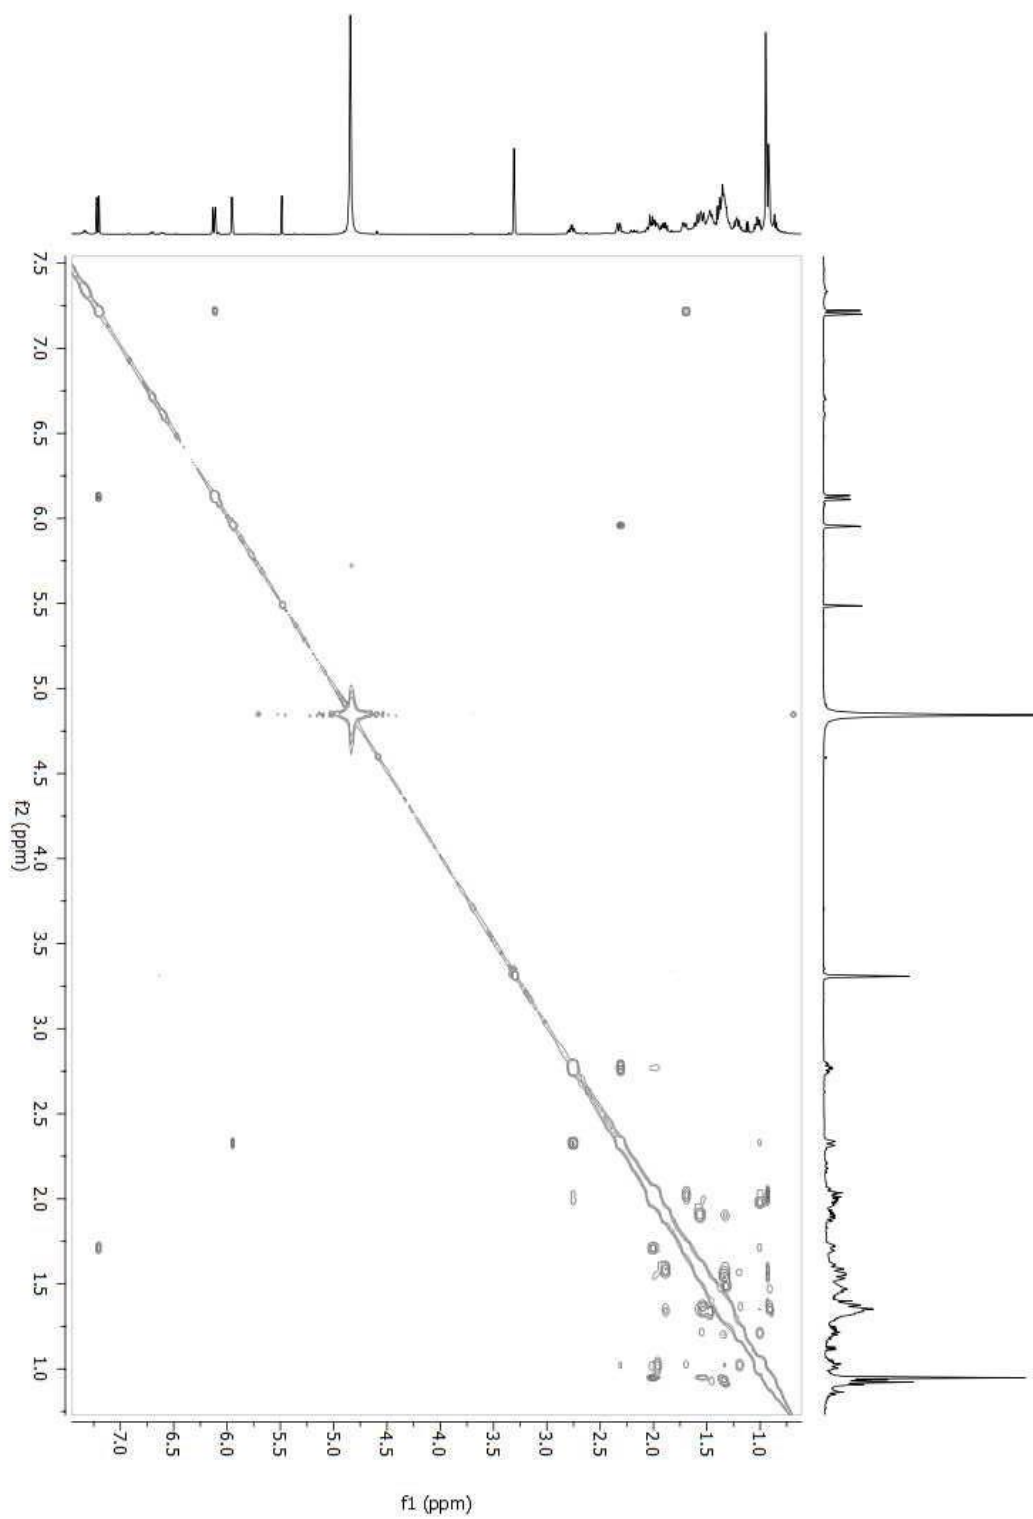

NOESY spectrum of compound **2f**(Methanol-*d*<sub>4</sub>)



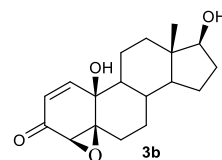

TK-23  
 Solvent: cd3od  
 Ambient temperature  
 QMNH 200 mm  
 PULSE SEQUENCE:arrayed  
 1st pulse arrayed  
 2nd pulse 73.6 degrees  
 Acq. time 1.067 sec  
 Arrayed 500.1 Hz  
 OBSERVE C13 50.2828747 MHz  
 DECOUPLE H1 199.9720686 MHz  
 Power 0 dB  
 WALTZ-16 modulated  
 DATA PROCESSING  
 Line broadening 0.5 Hz  
 FI size 32789  
 Total time 07 minutes

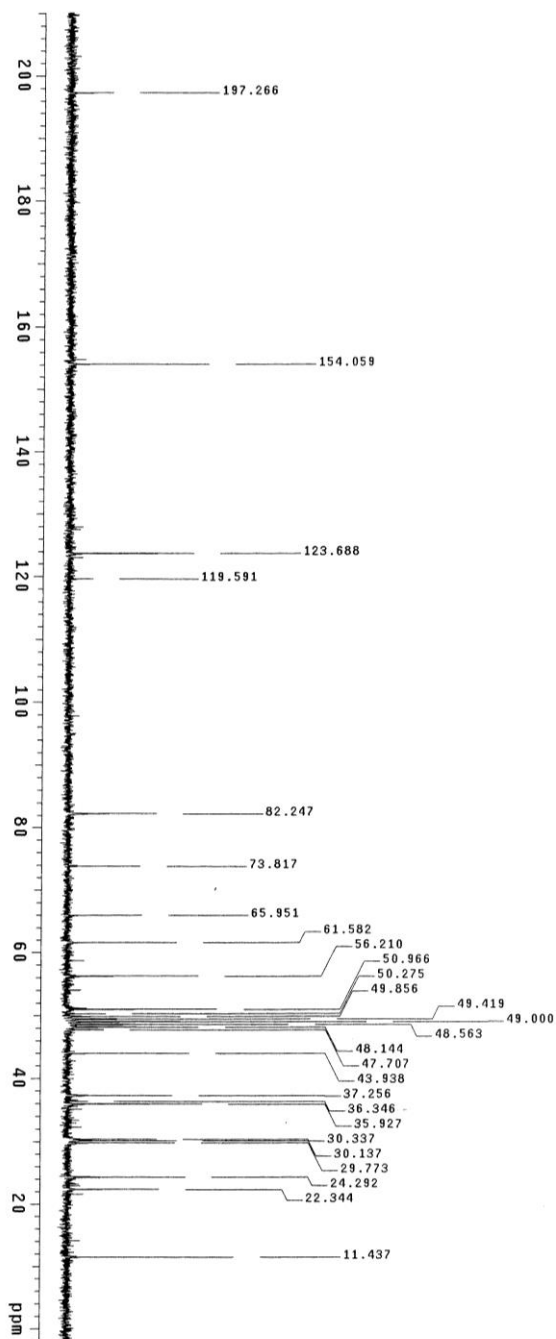

<sup>13</sup>C NMR spectrum of compound **3b** (50 MHz, Acetone *d*<sub>6</sub>)

3.6. Spectra of compound **3d**

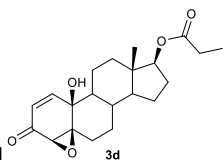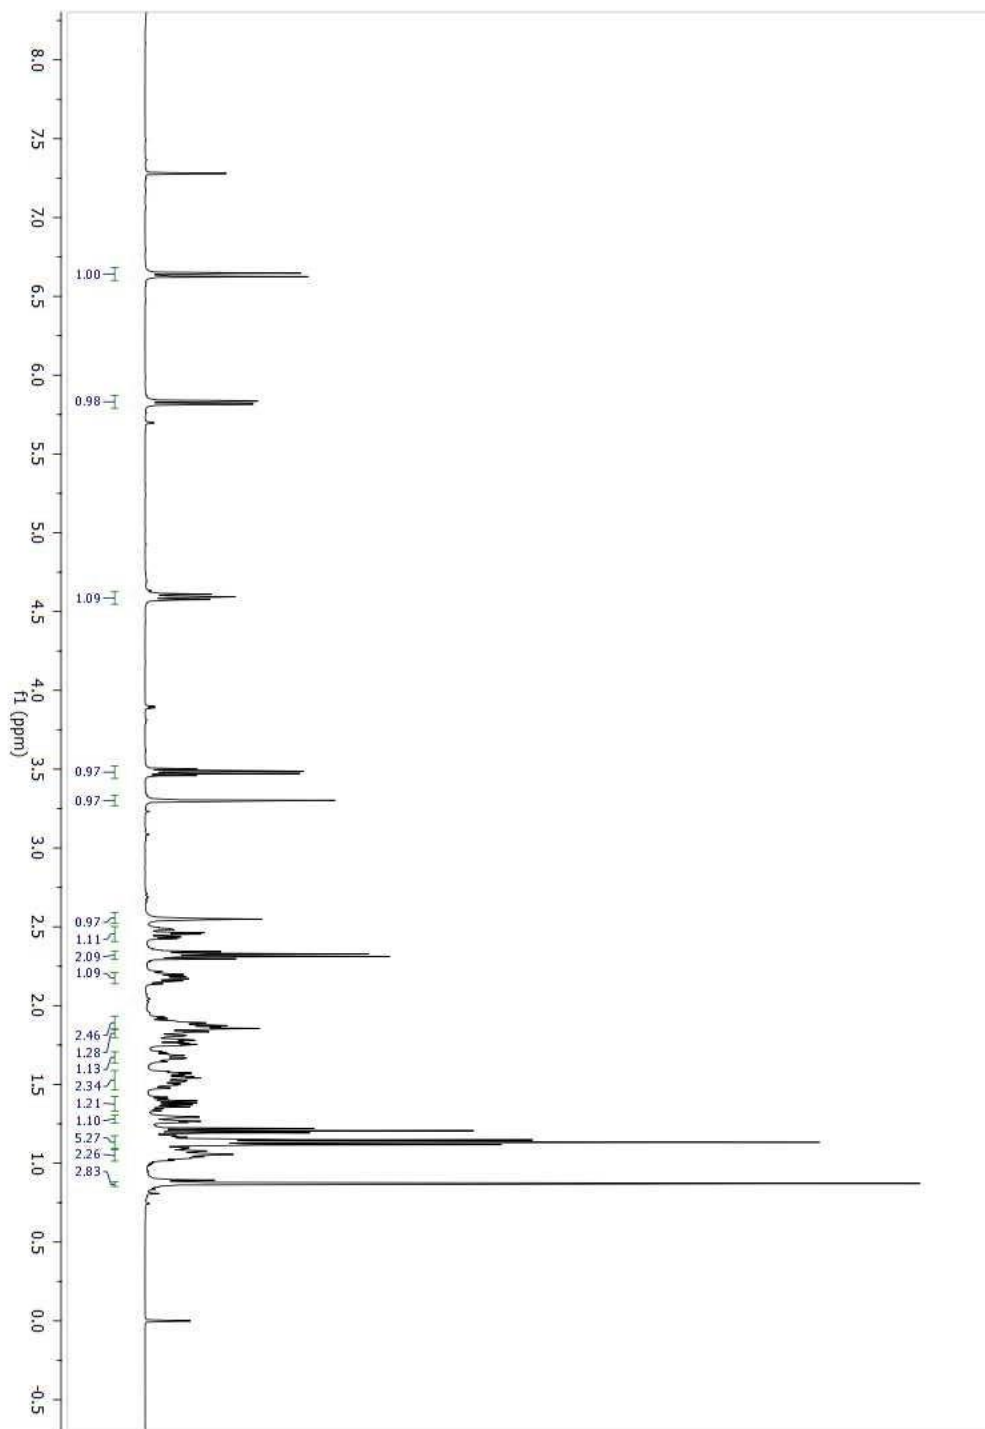

<sup>1</sup>H NMR spectrum of compound **3d** (500 MHz, CDCl<sub>3</sub>)

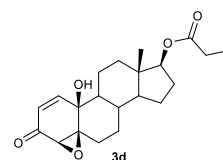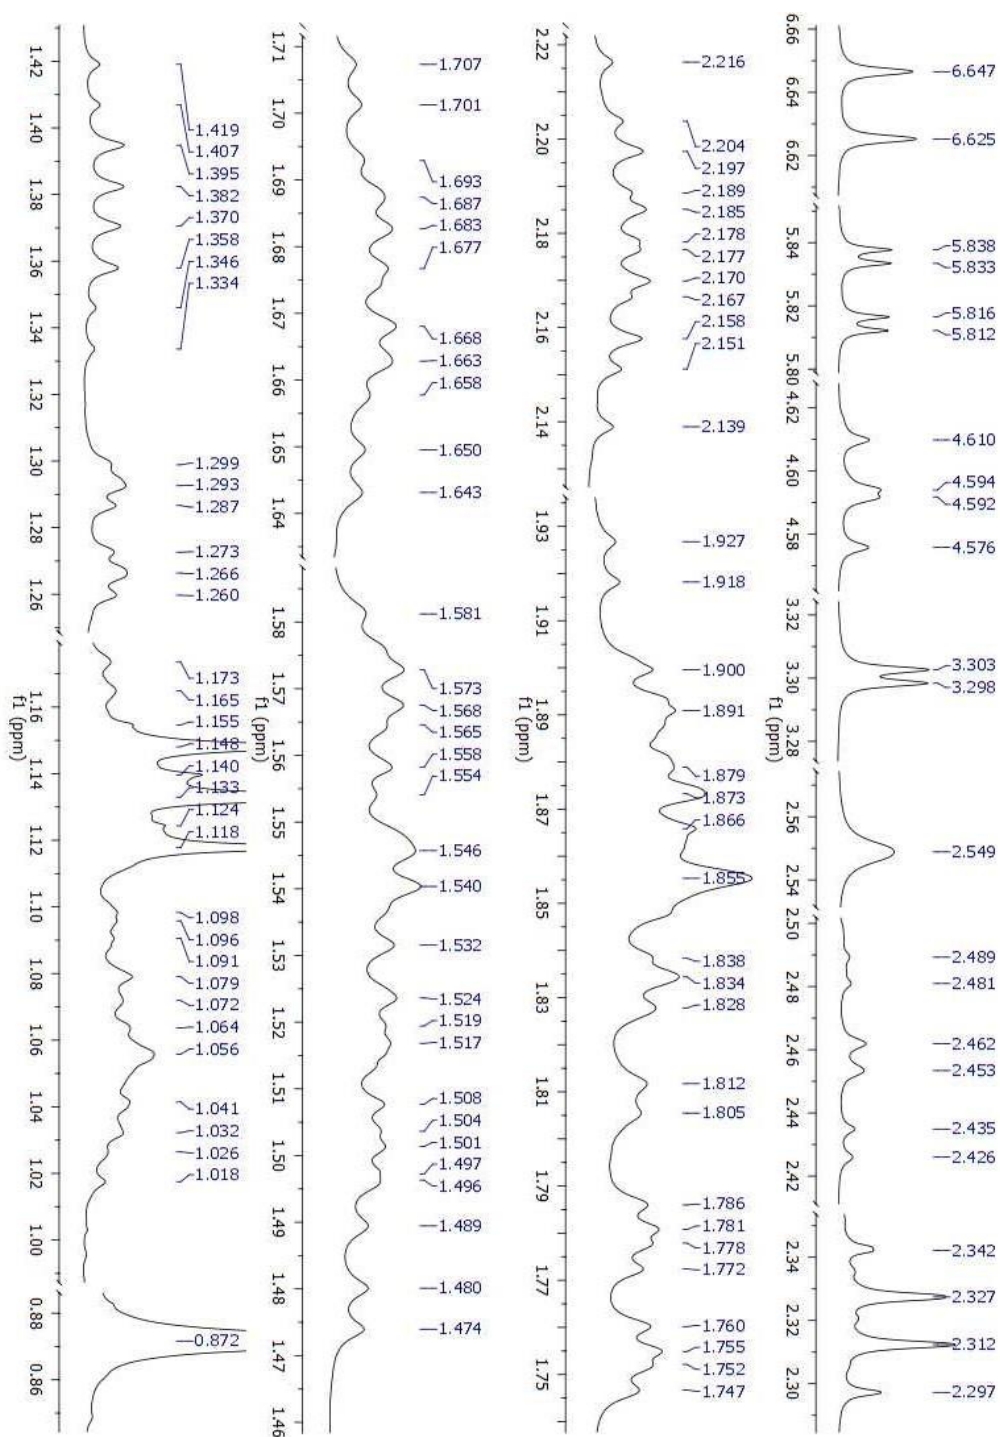

<sup>1</sup>H NMR spectrum of compound 3d (500 MHz, CDCl<sub>3</sub>)

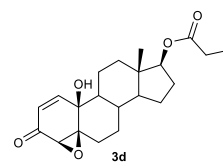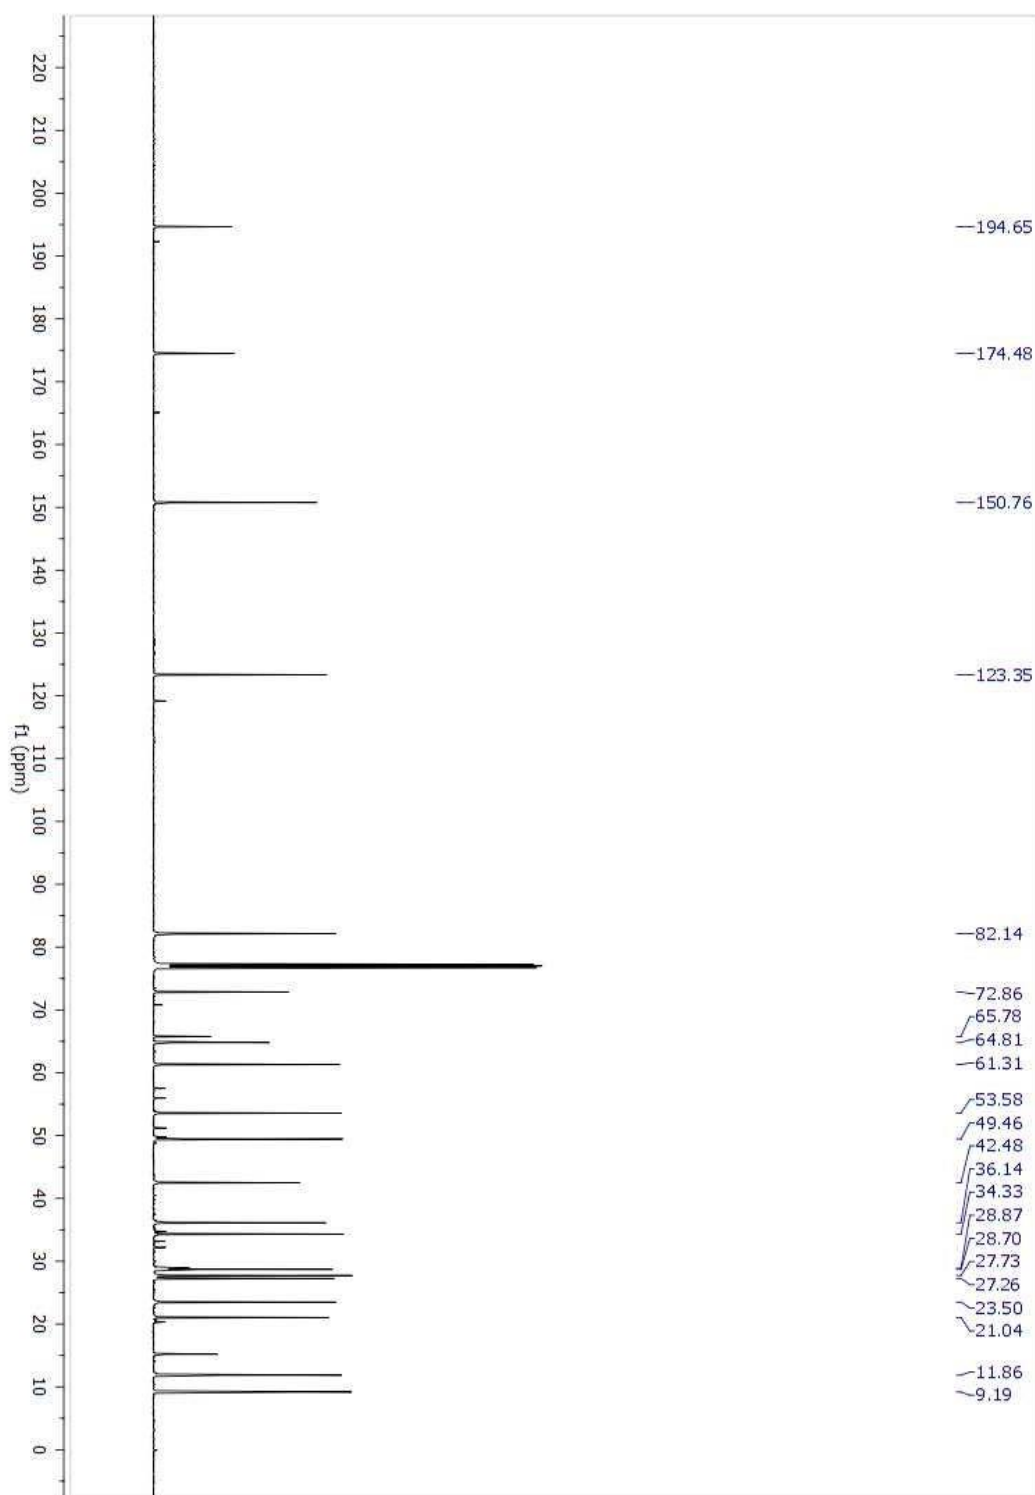

$^{13}\text{C}$  NMR spectrum of compound **3d** (125 MHz,  $\text{CDCl}_3$ )

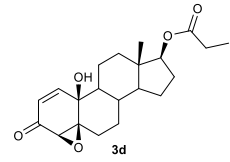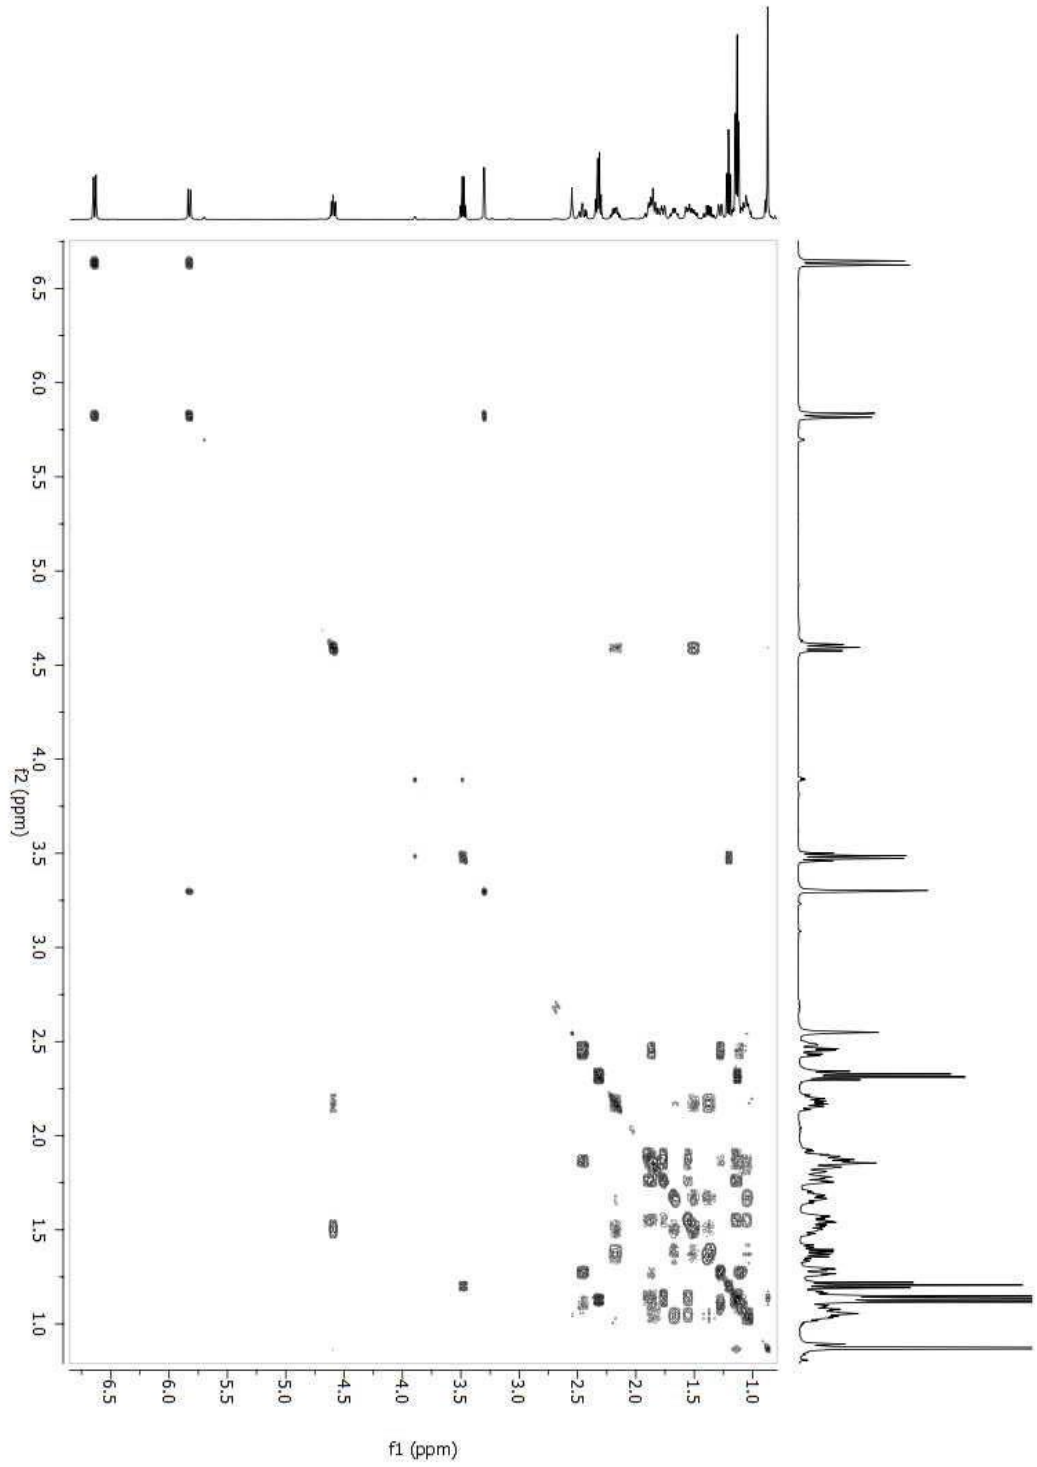

COSY spectrum of compound **3d** ( $\text{CDCl}_3$ )



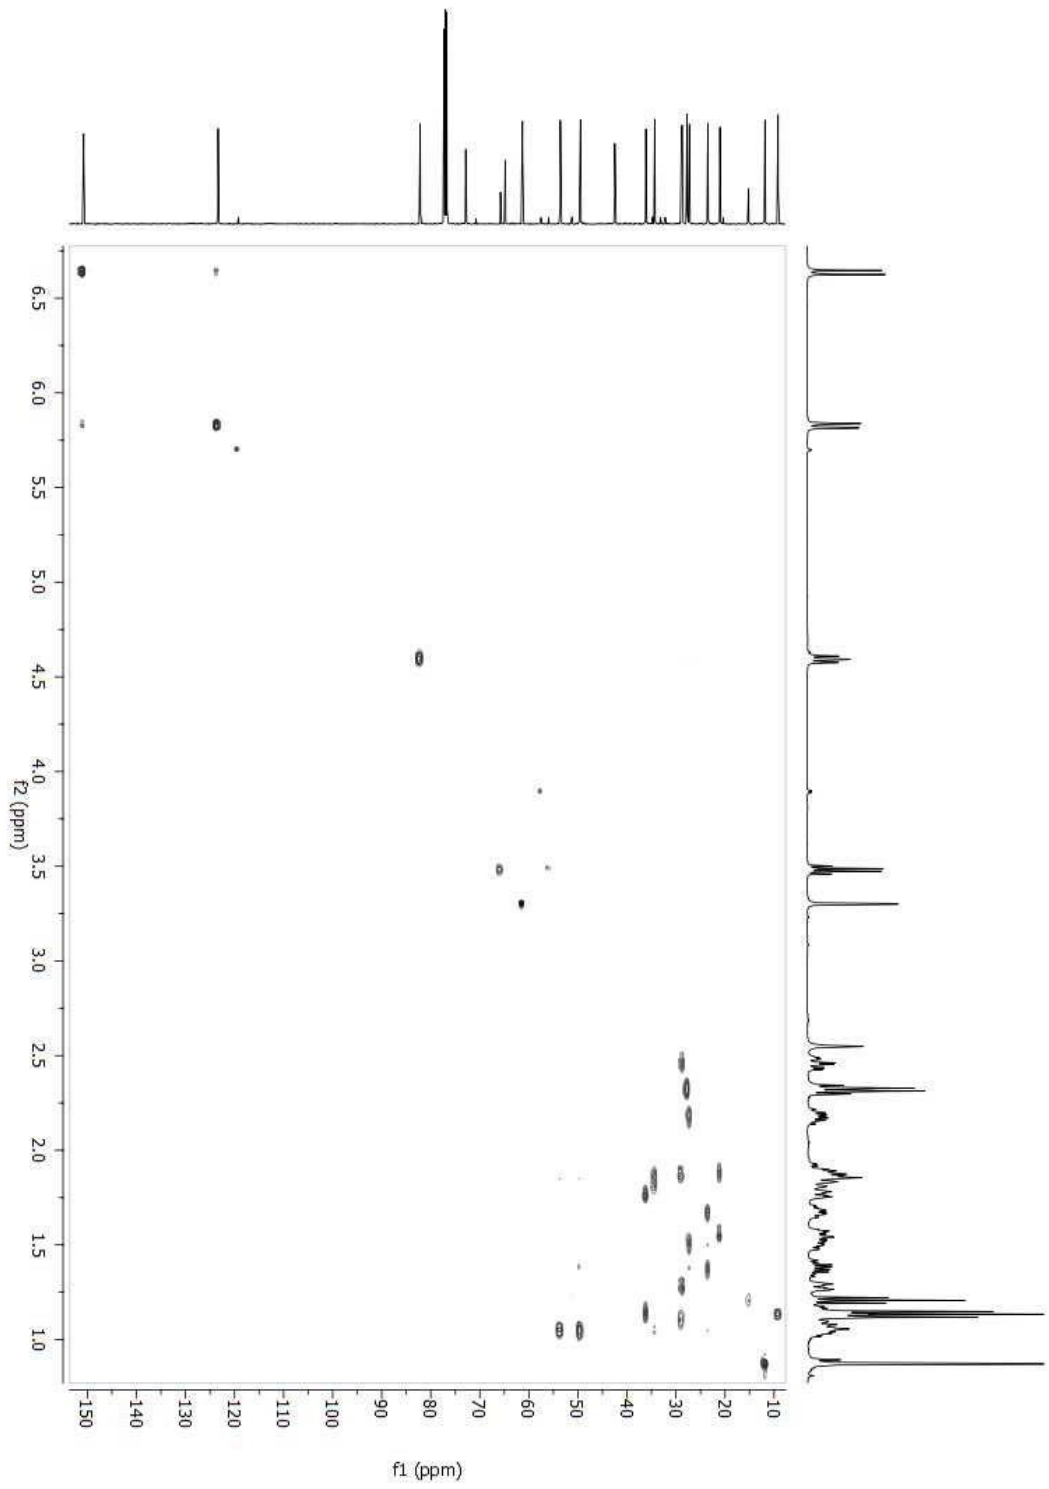

HSQC spectrum of compound **3d**(CDCl<sub>3</sub>)

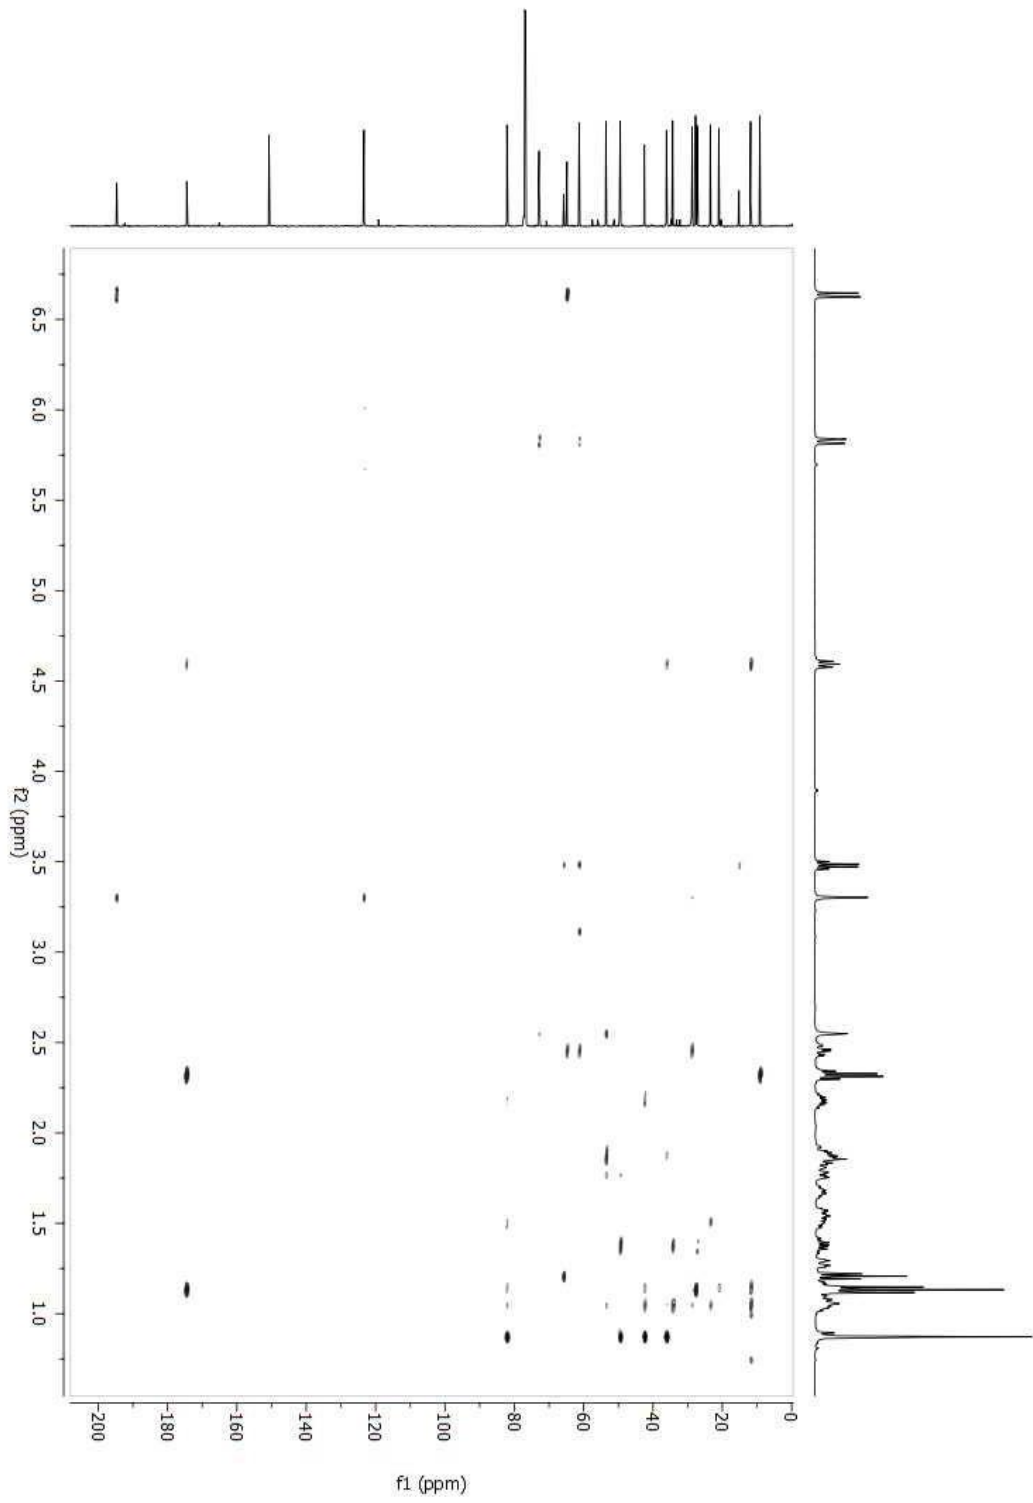

HMBC spectrum of compound **3d**(CDCl<sub>3</sub>)

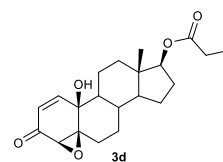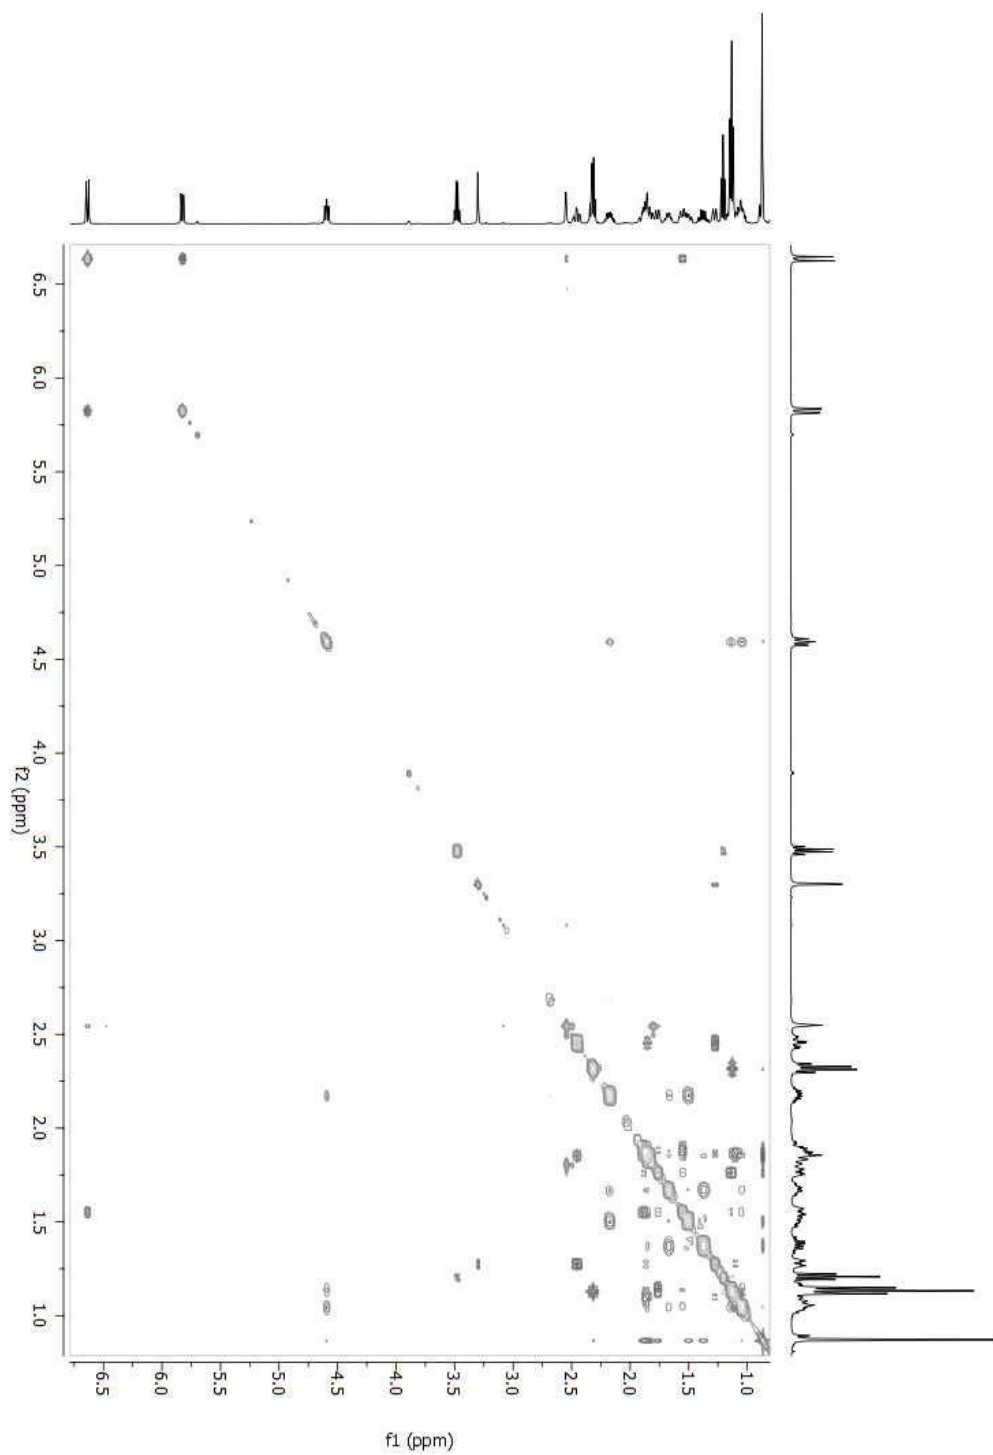

NOESY spectrum of compound **3d**(CDCl<sub>3</sub>)

3.7. Spectra of compound **3e**

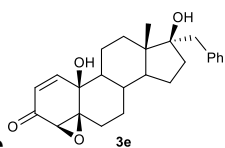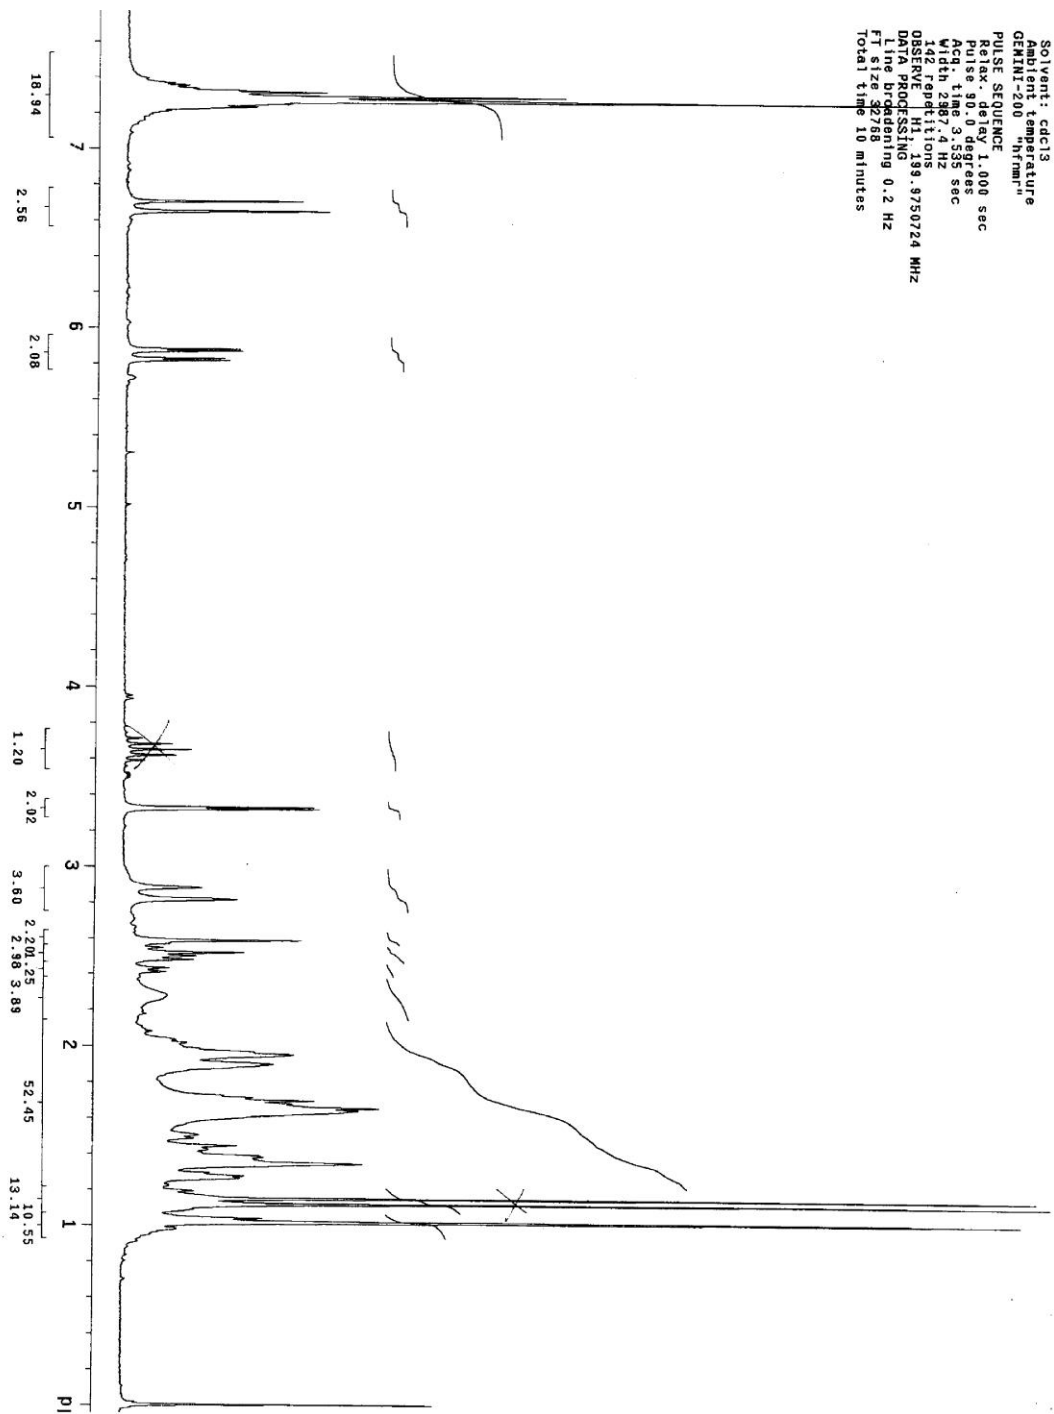

Solvent: cdcl3  
 Ambient temperature  
 GEMIN-200 1Hnmr  
 PULSE SEQUENCE  
 Relax delay 1.000 sec  
 Acquisition time 3.555 sec  
 Width 2887.4 Hz  
 142 Repetitions  
 OBSERVE H1 199.9750724 MHz  
 DATA PROCESSING  
 Fine tuning 0.2 Hz  
 Total time 10 minutes

<sup>1</sup>H NMR spectrum of compound **3e** (200 MHz, CDCl<sub>3</sub>)

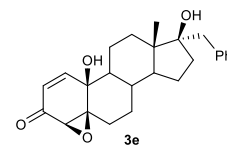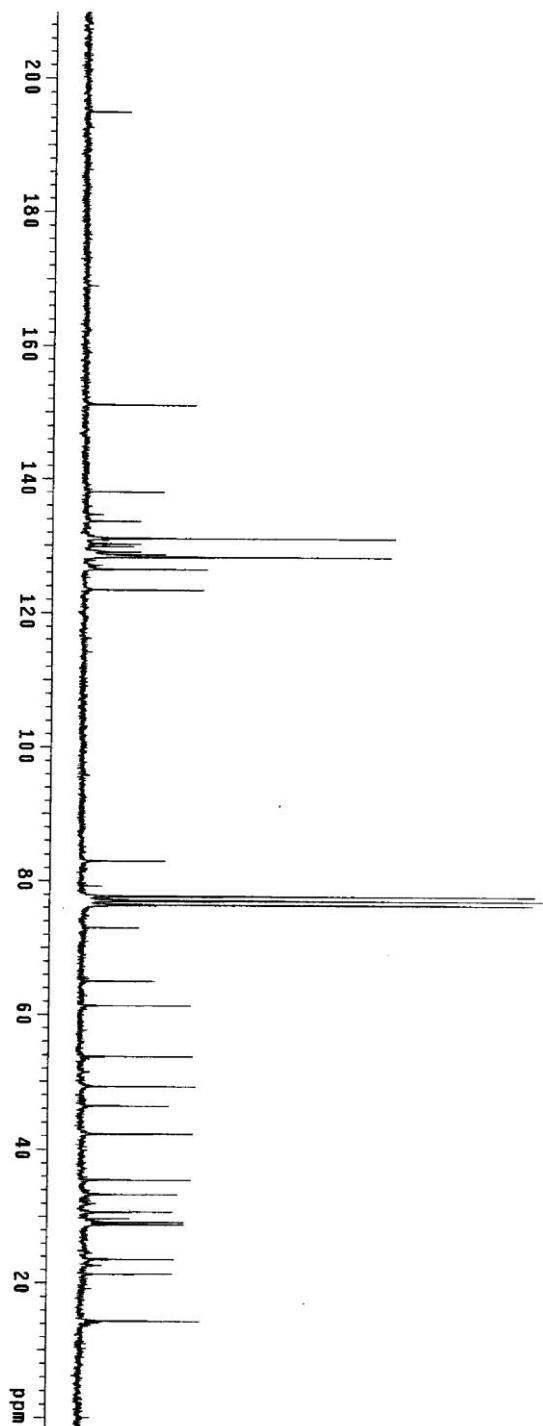

$^{13}\text{C}$  NMR spectrum of compound **3e** (50 MHz,  $\text{CDCl}_3$ )

3.8. Spectra of compound **3f**

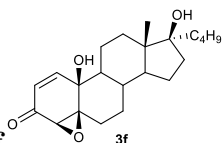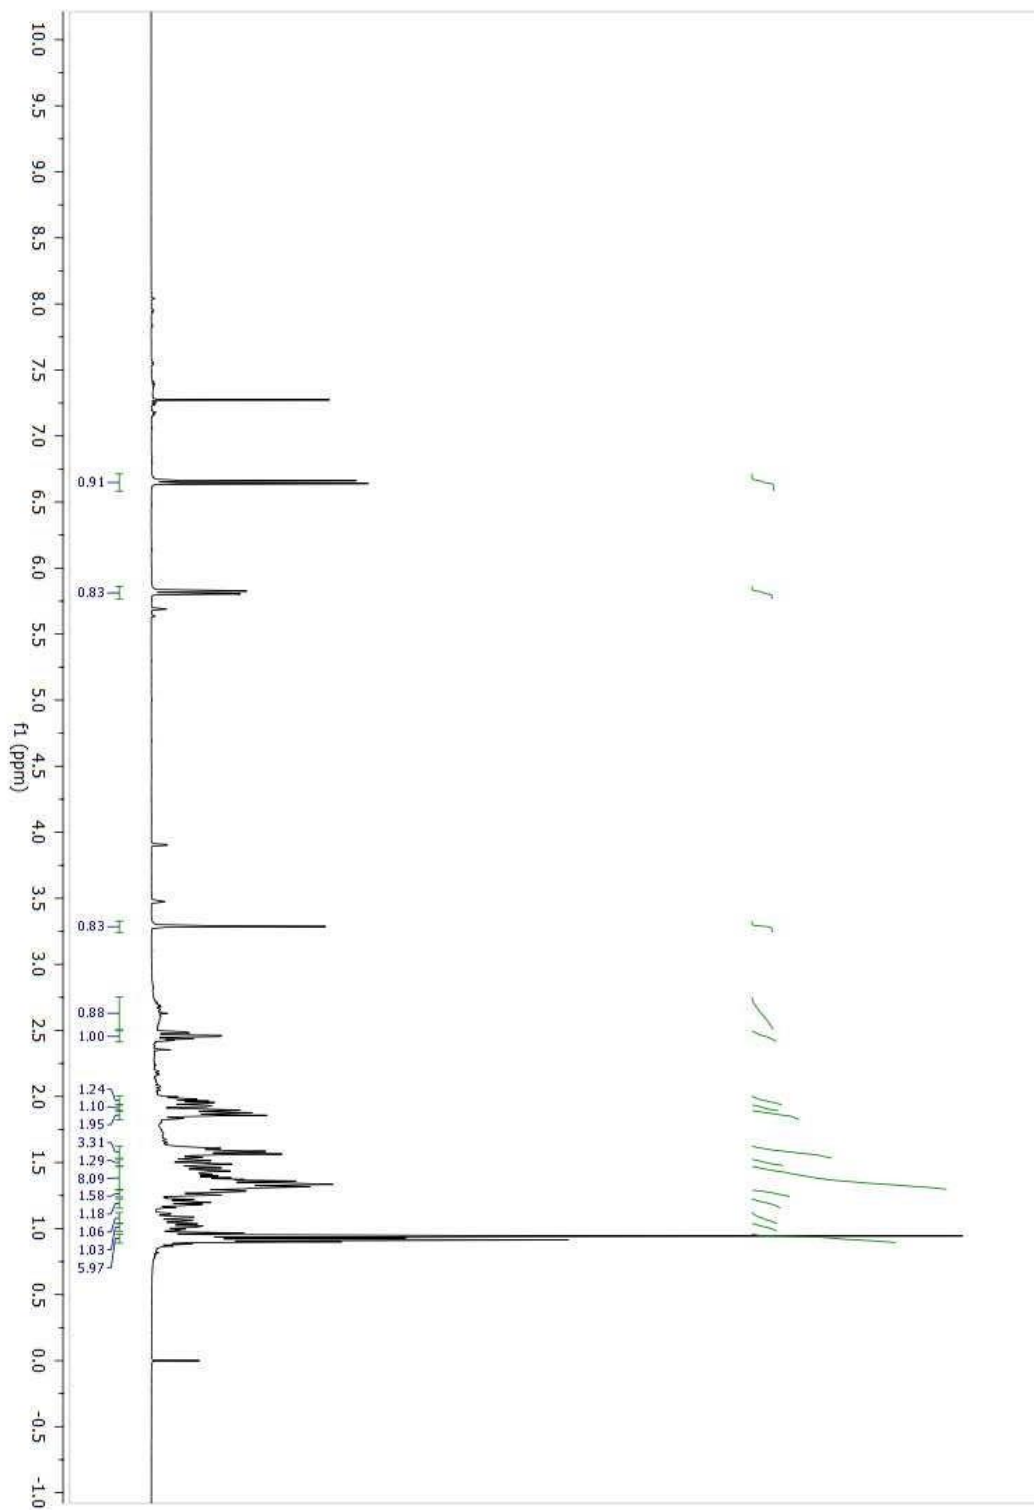

$^1\text{H}$  NMR spectrum of compound **3f** (500 MHz,  $\text{CDCl}_3$ )

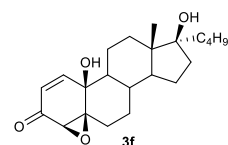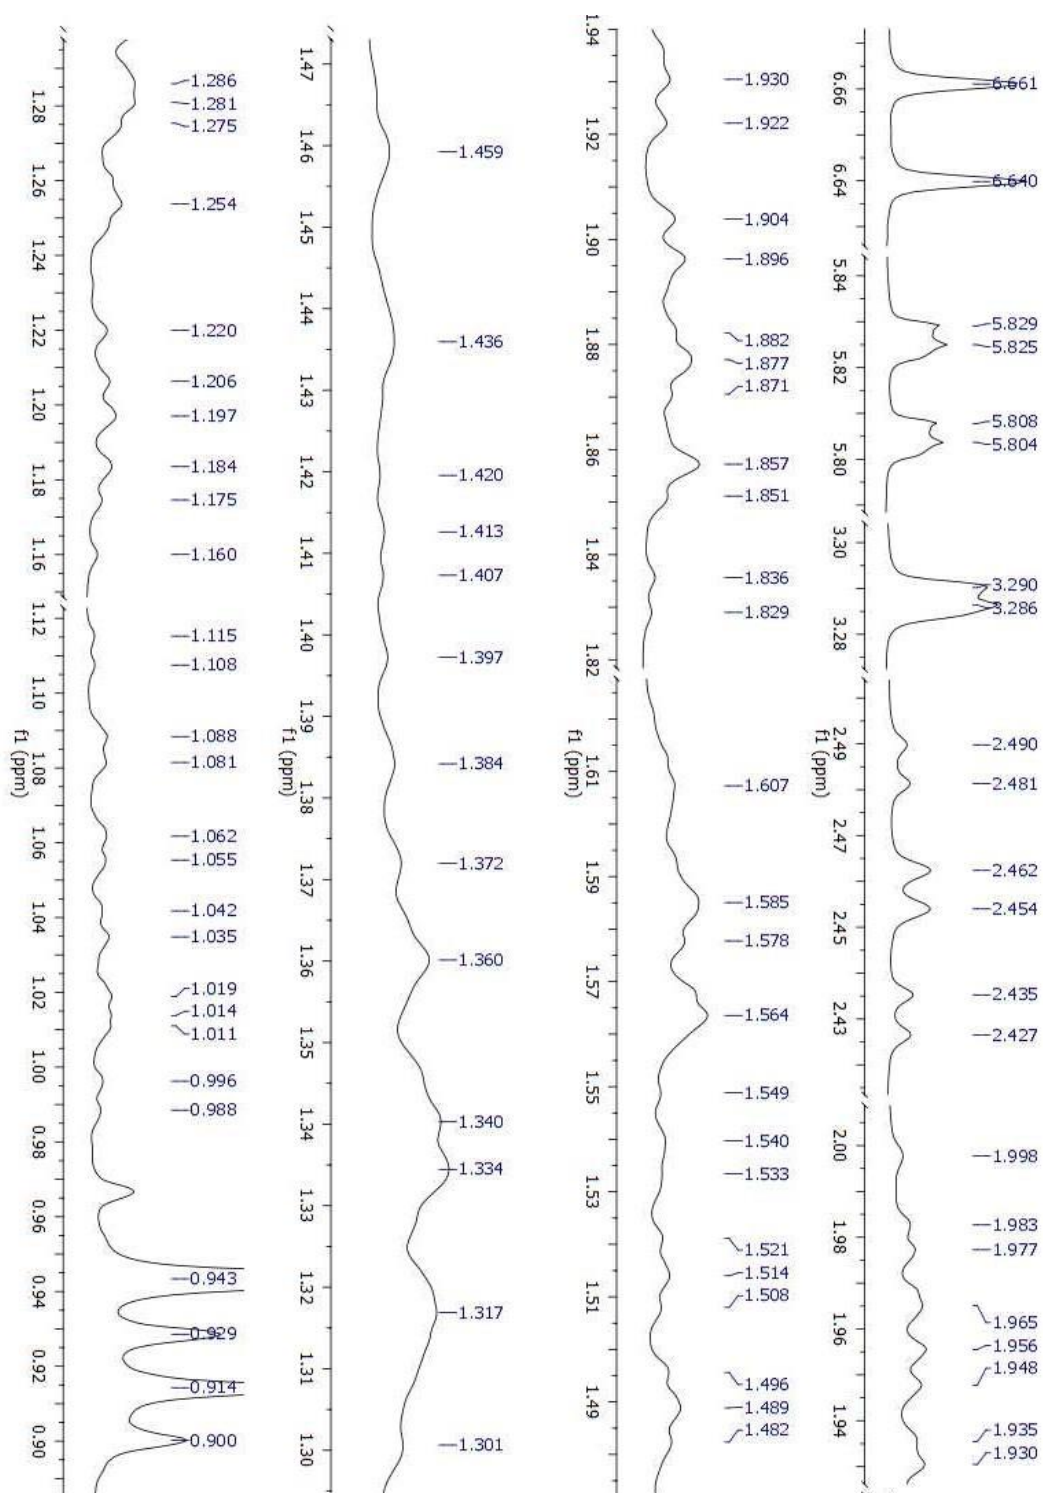

$^1\text{H}$  NMR spectrum of compound **3f** (500 MHz,  $\text{CDCl}_3$ )

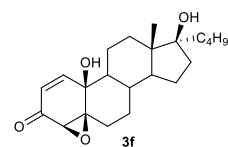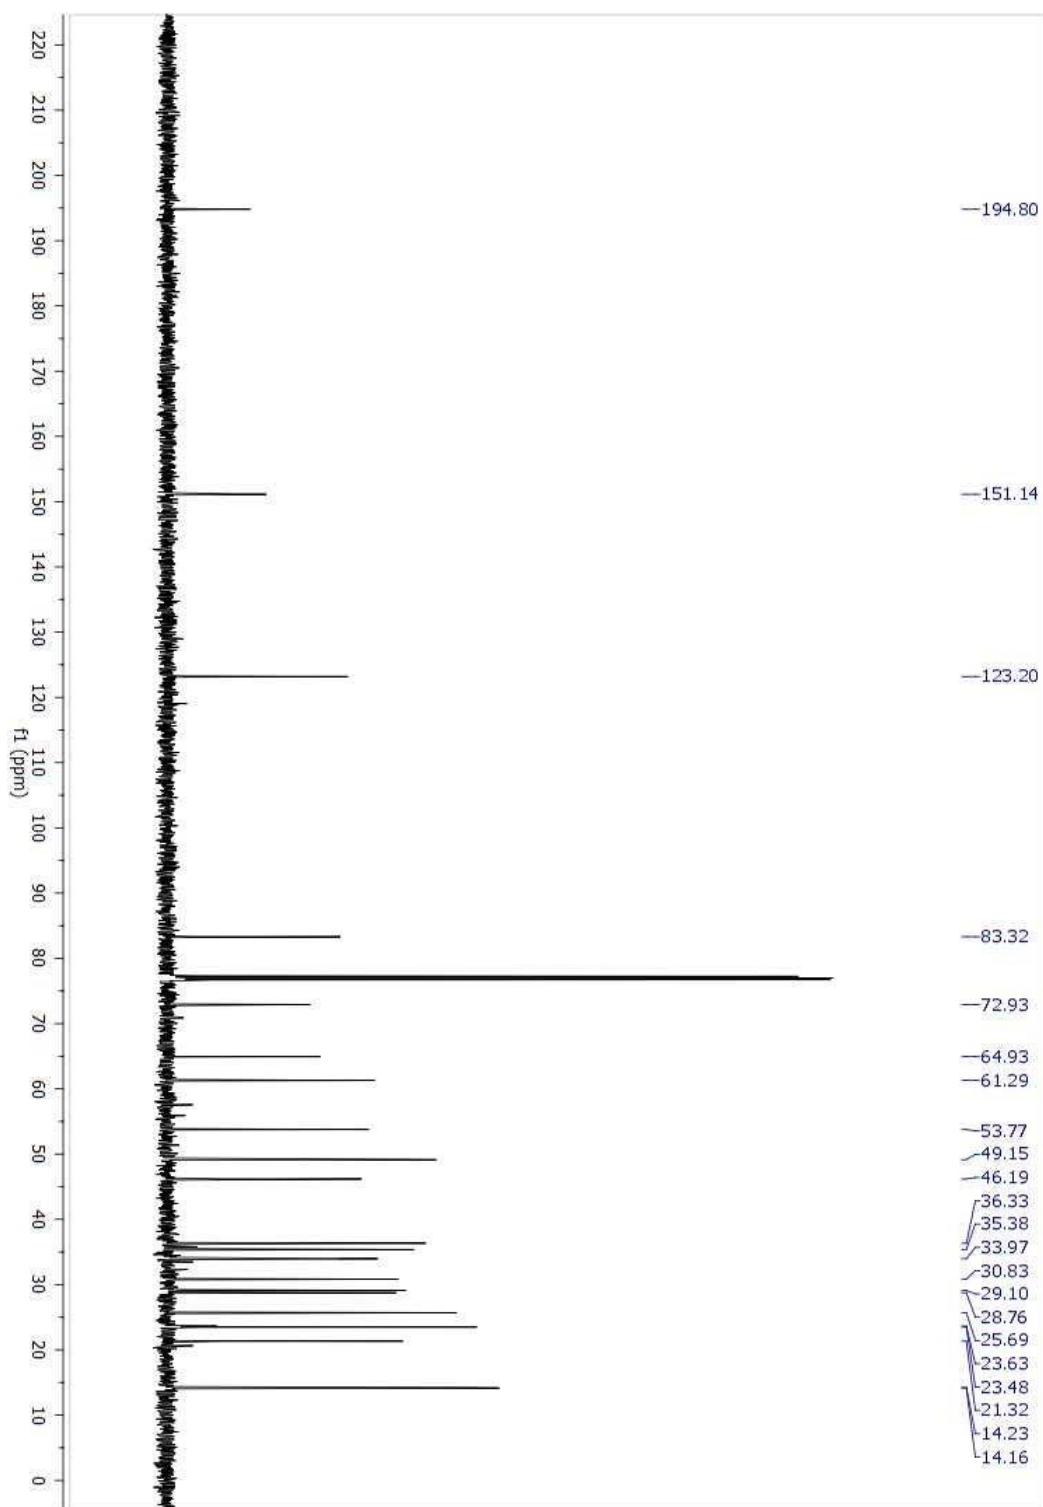

$^{13}\text{C}$  NMR spectrum of compound **3f** (125 MHz,  $\text{CDCl}_3$ )



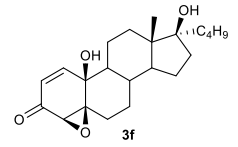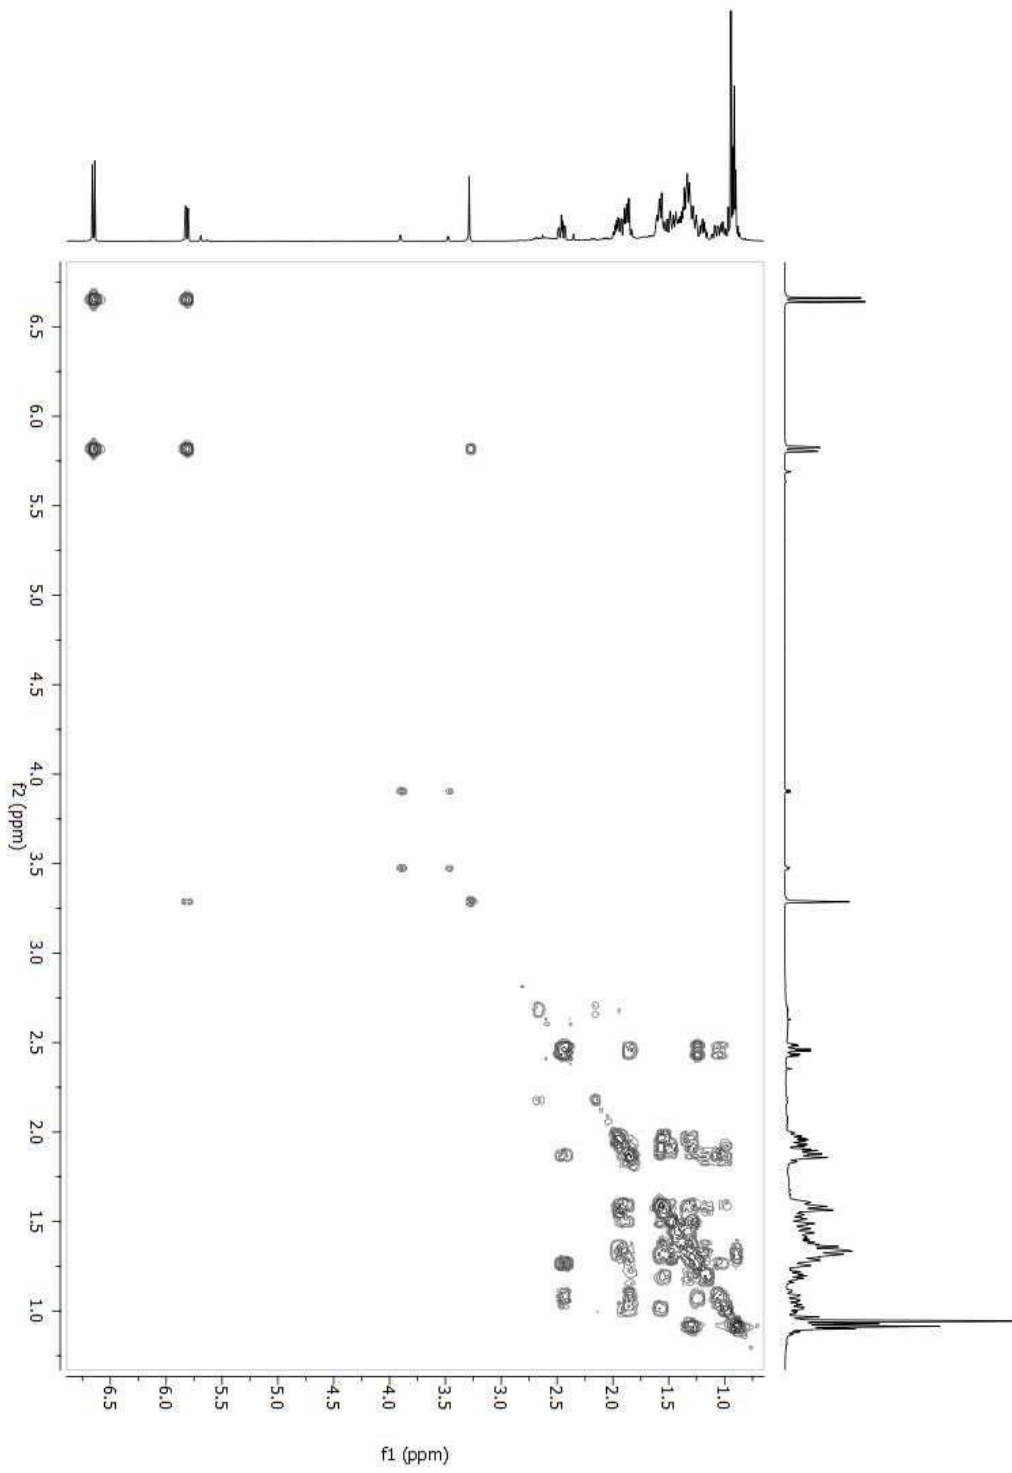

COSY spectrum of compound **3f**(CDCl<sub>3</sub>)

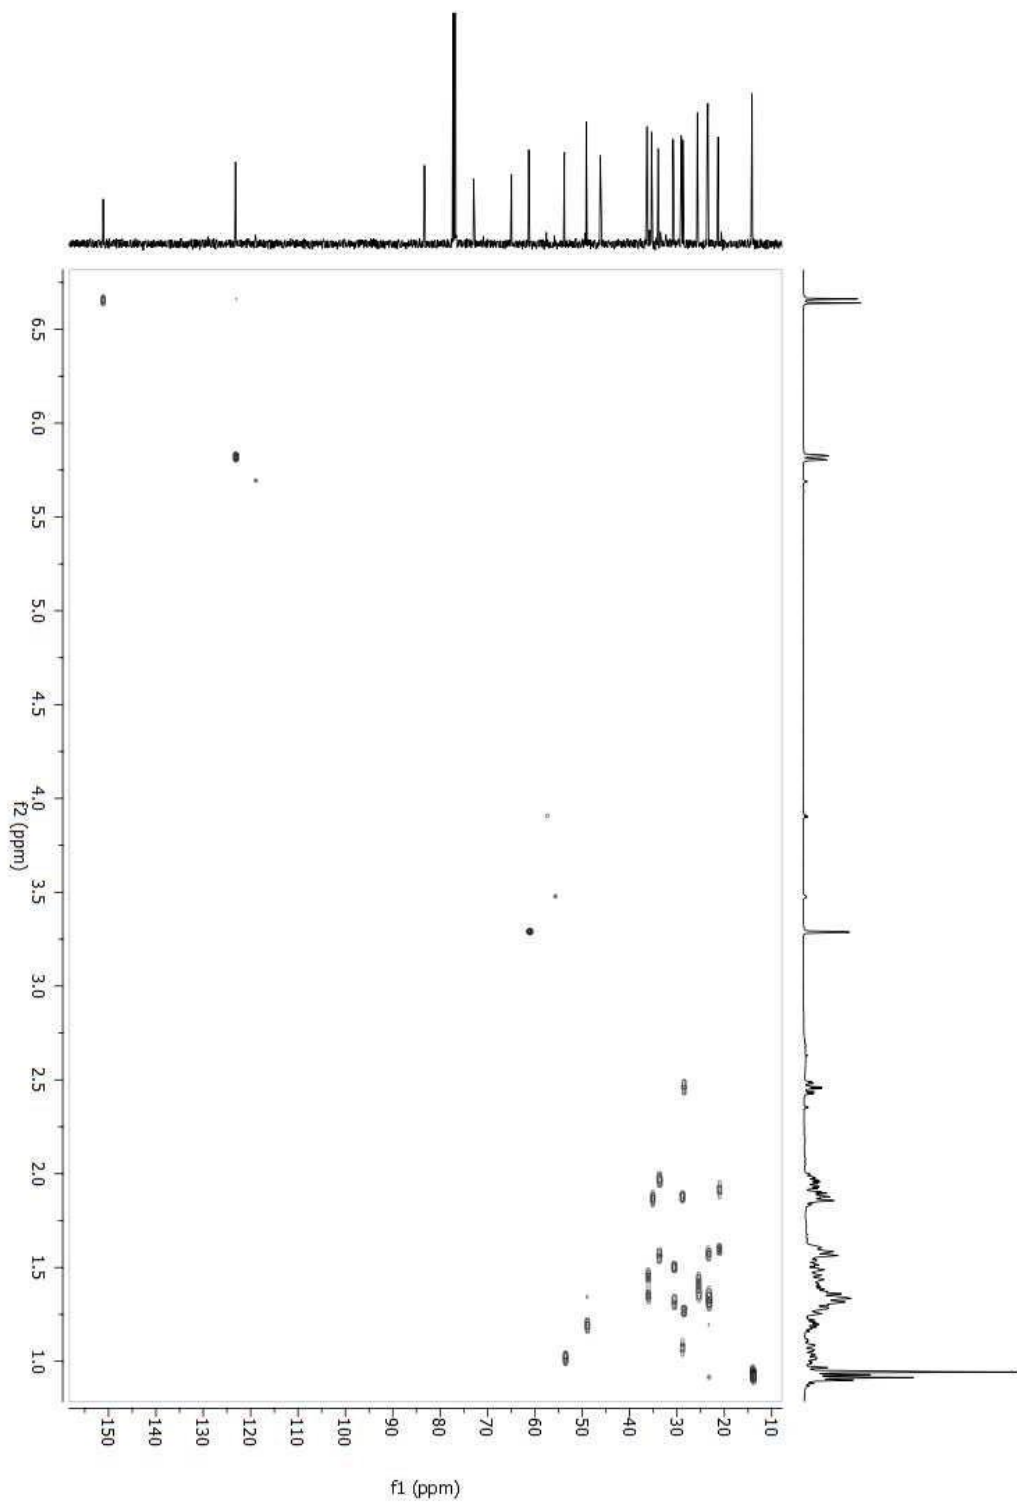

HSQC spectrum of compound **3f**(CDCl<sub>3</sub>)

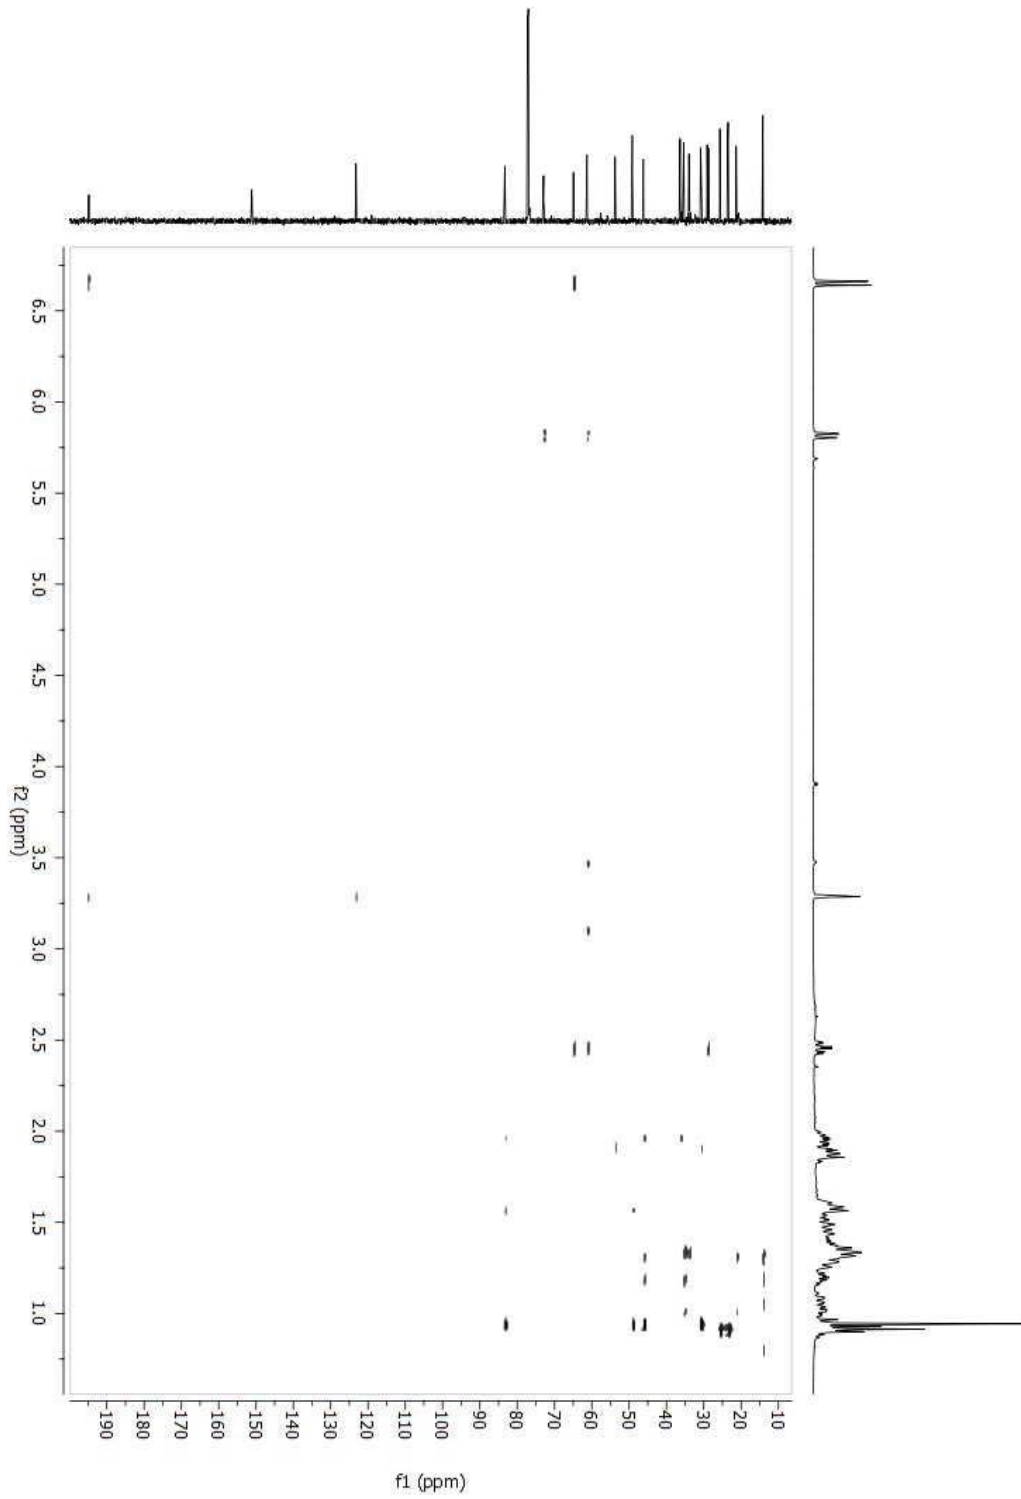

HMBC spectrum of compound **3f**( $\text{CDCl}_3$ )

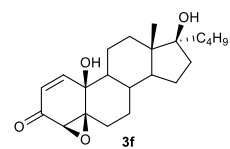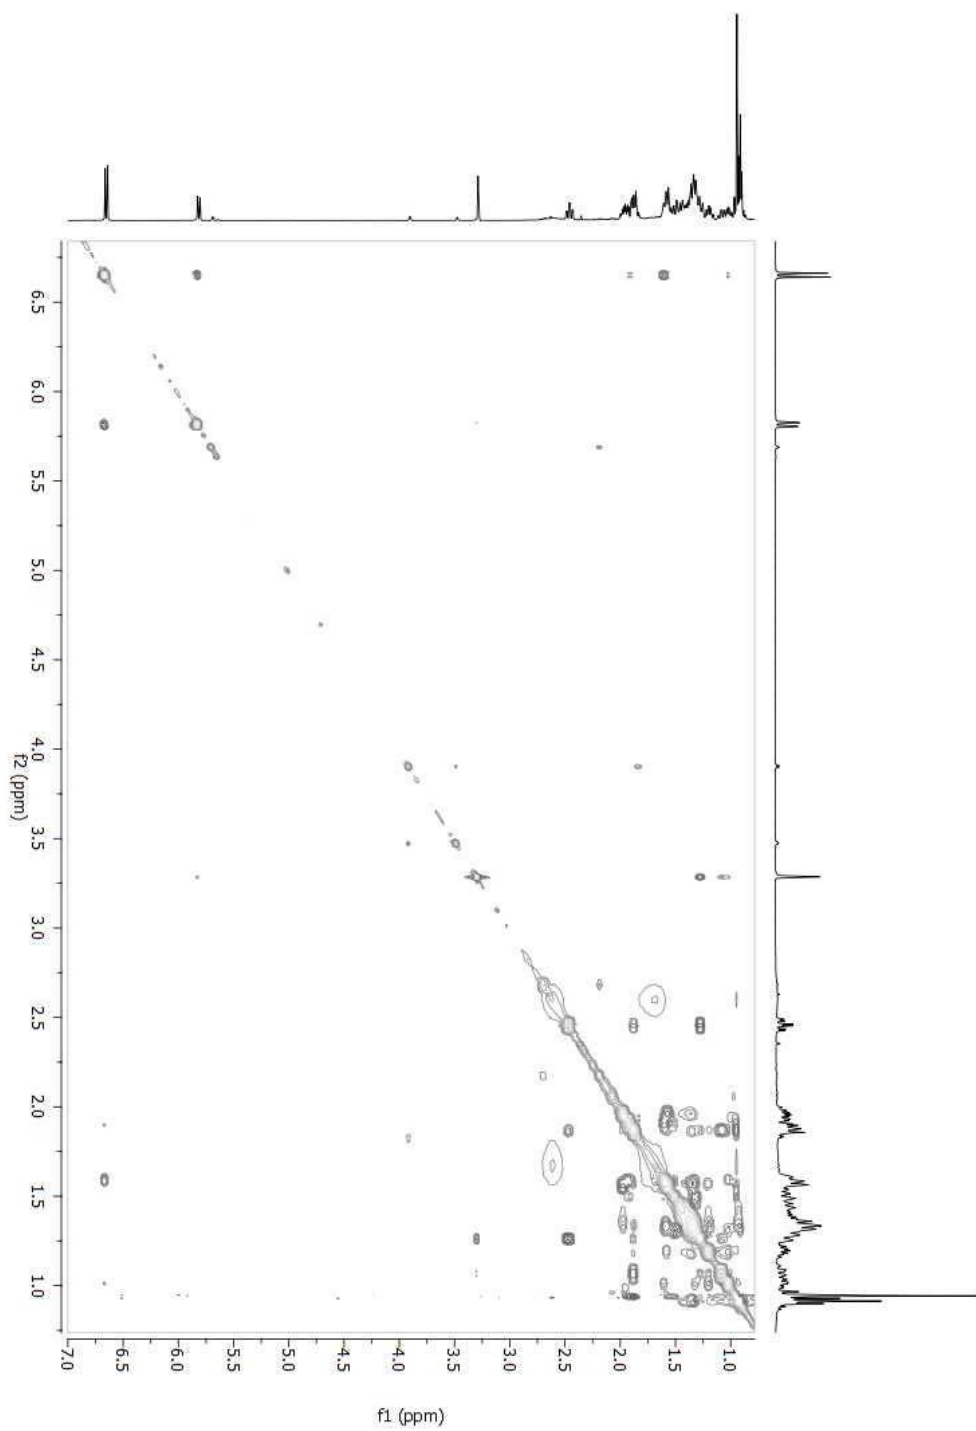

NOESY spectrum of compound **3f** ( $\text{CDCl}_3$ )

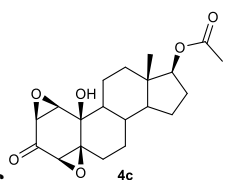

### 3.9. Spectra of compound **4c**

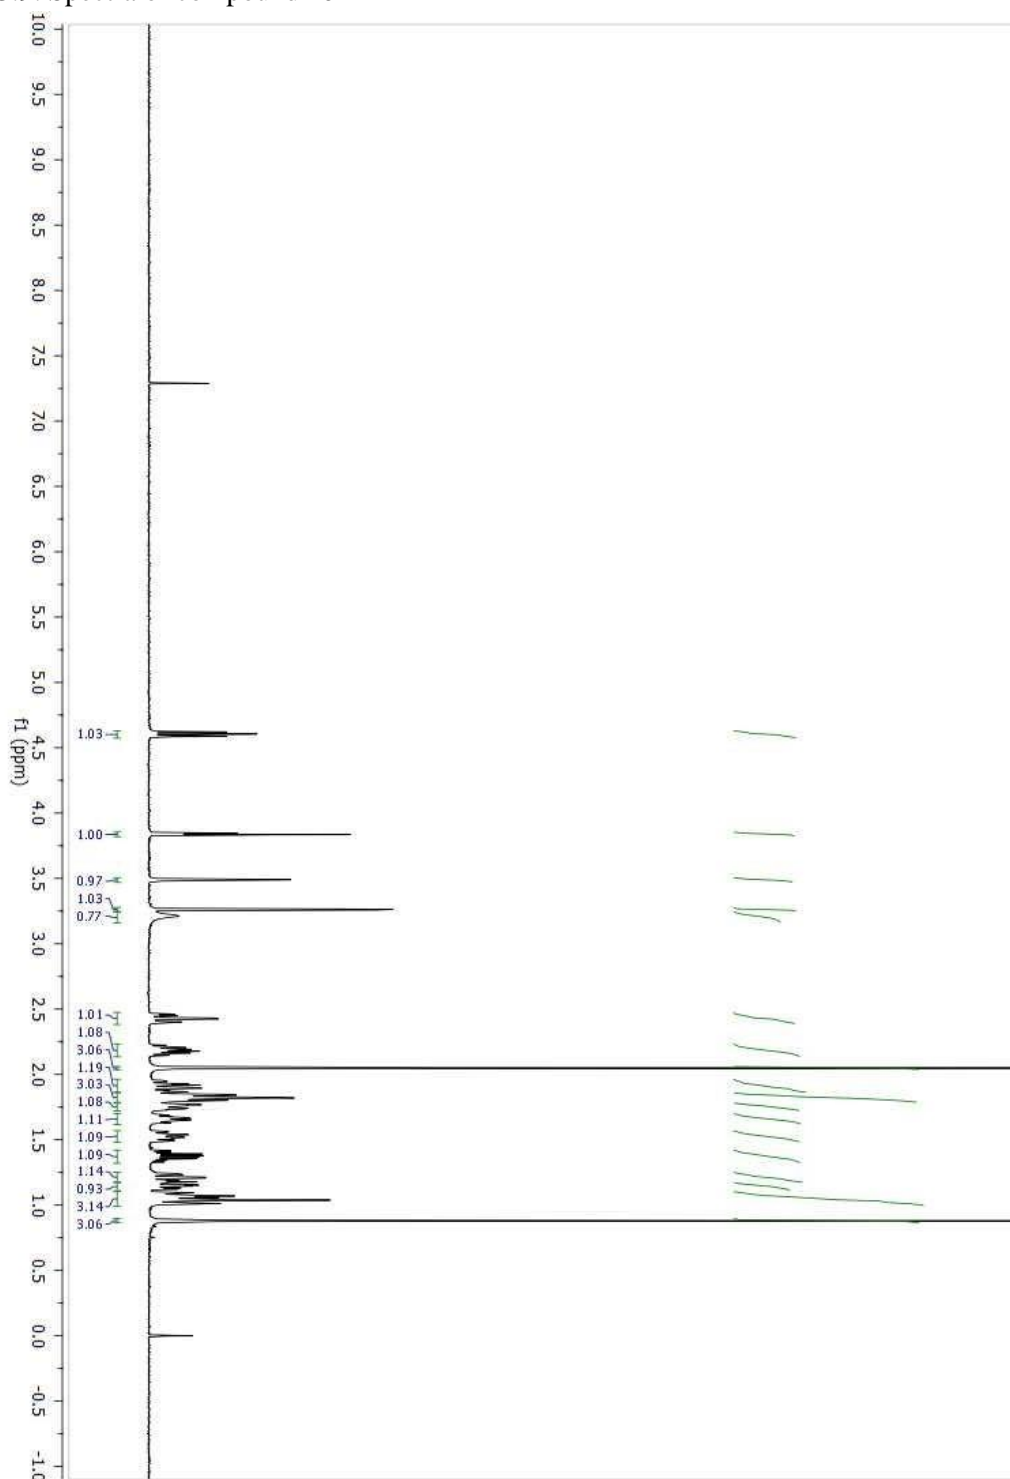

$^1\text{H}$  NMR spectrum of compound **4c** (500 MHz,  $\text{CDCl}_3$ )

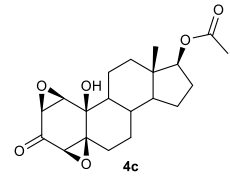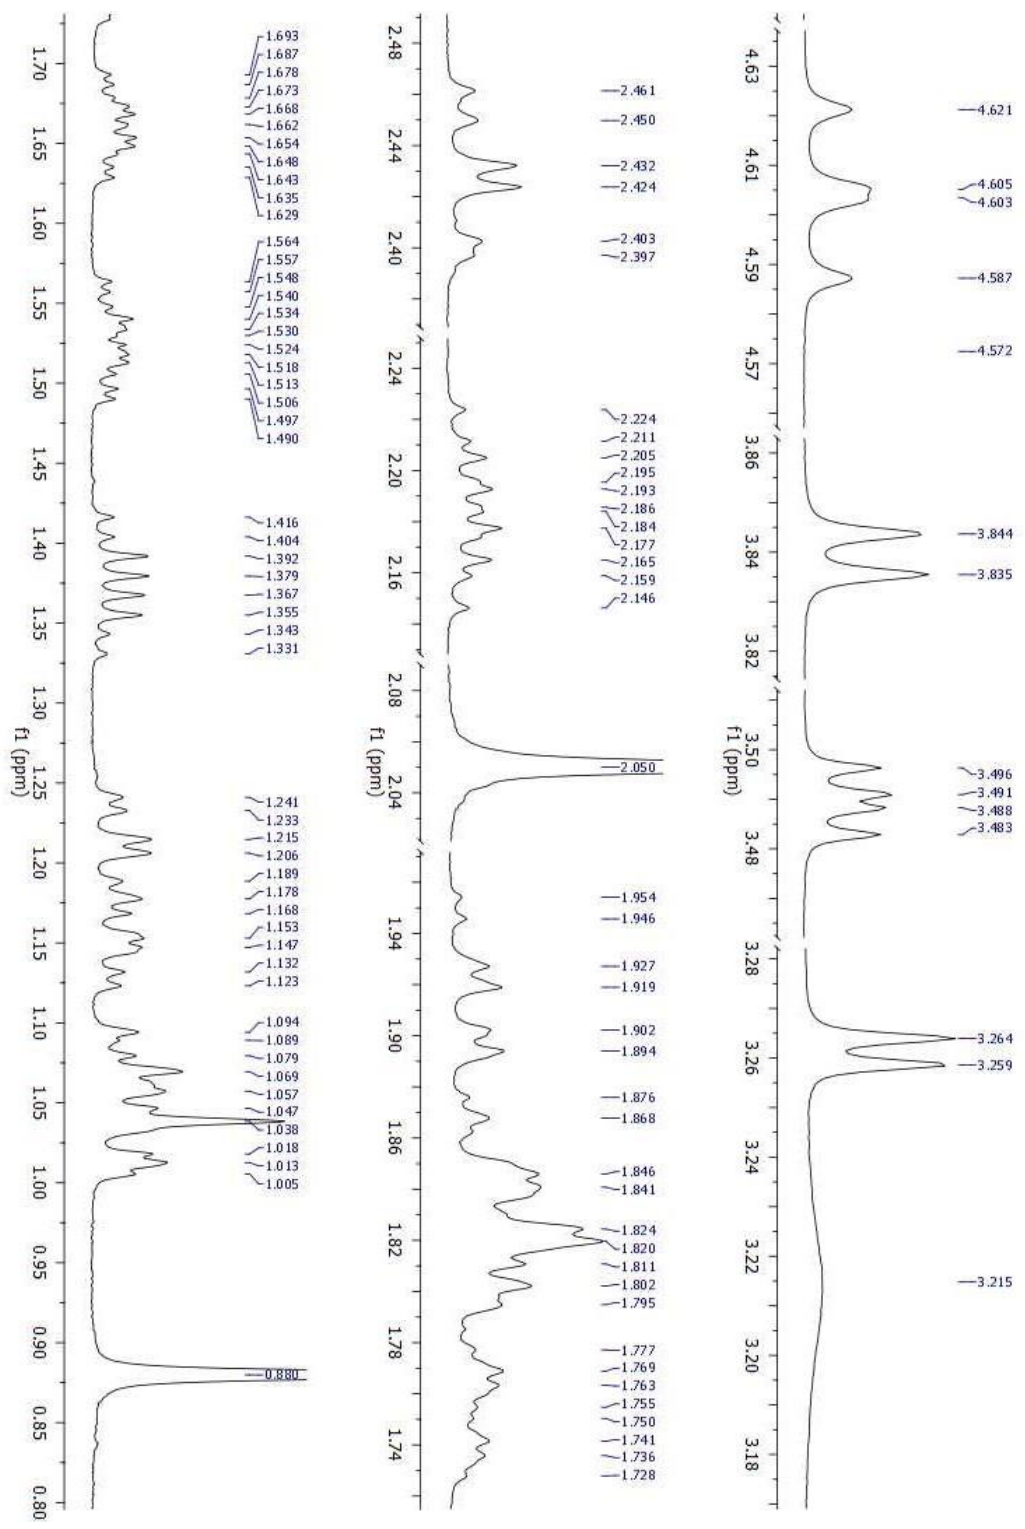

<sup>1</sup>H NMR spectrum of compound 4c (500 MHz, CDCl<sub>3</sub>)

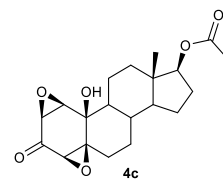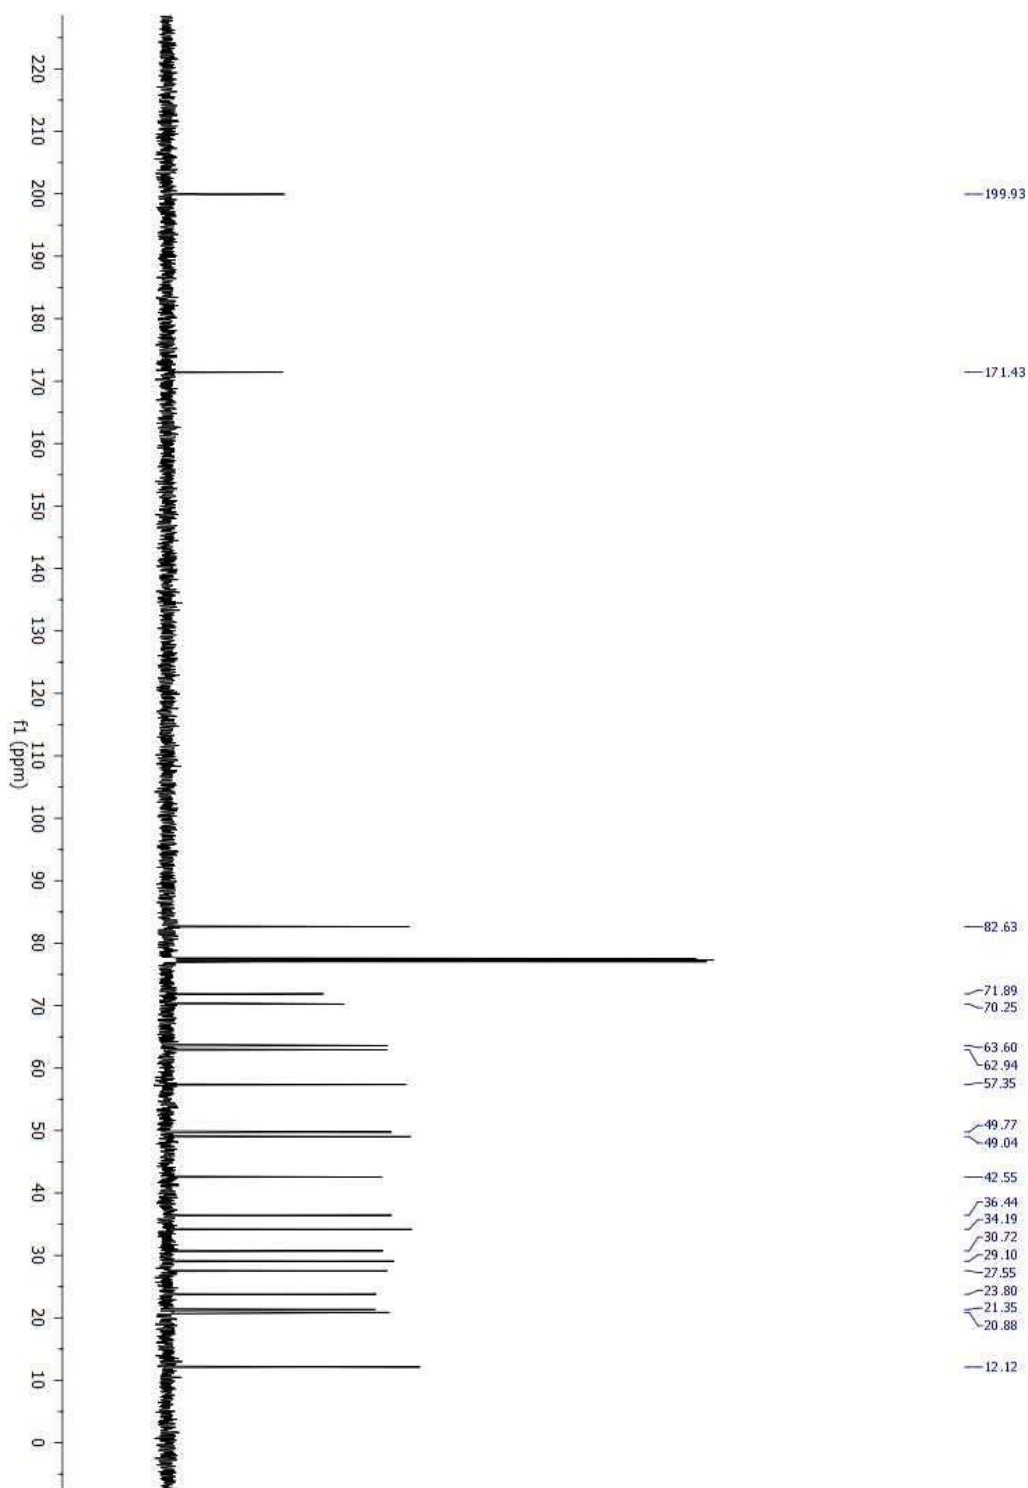

$^{13}\text{C}$  NMR spectrum of compound **4c** (125 MHz,  $\text{CDCl}_3$ )

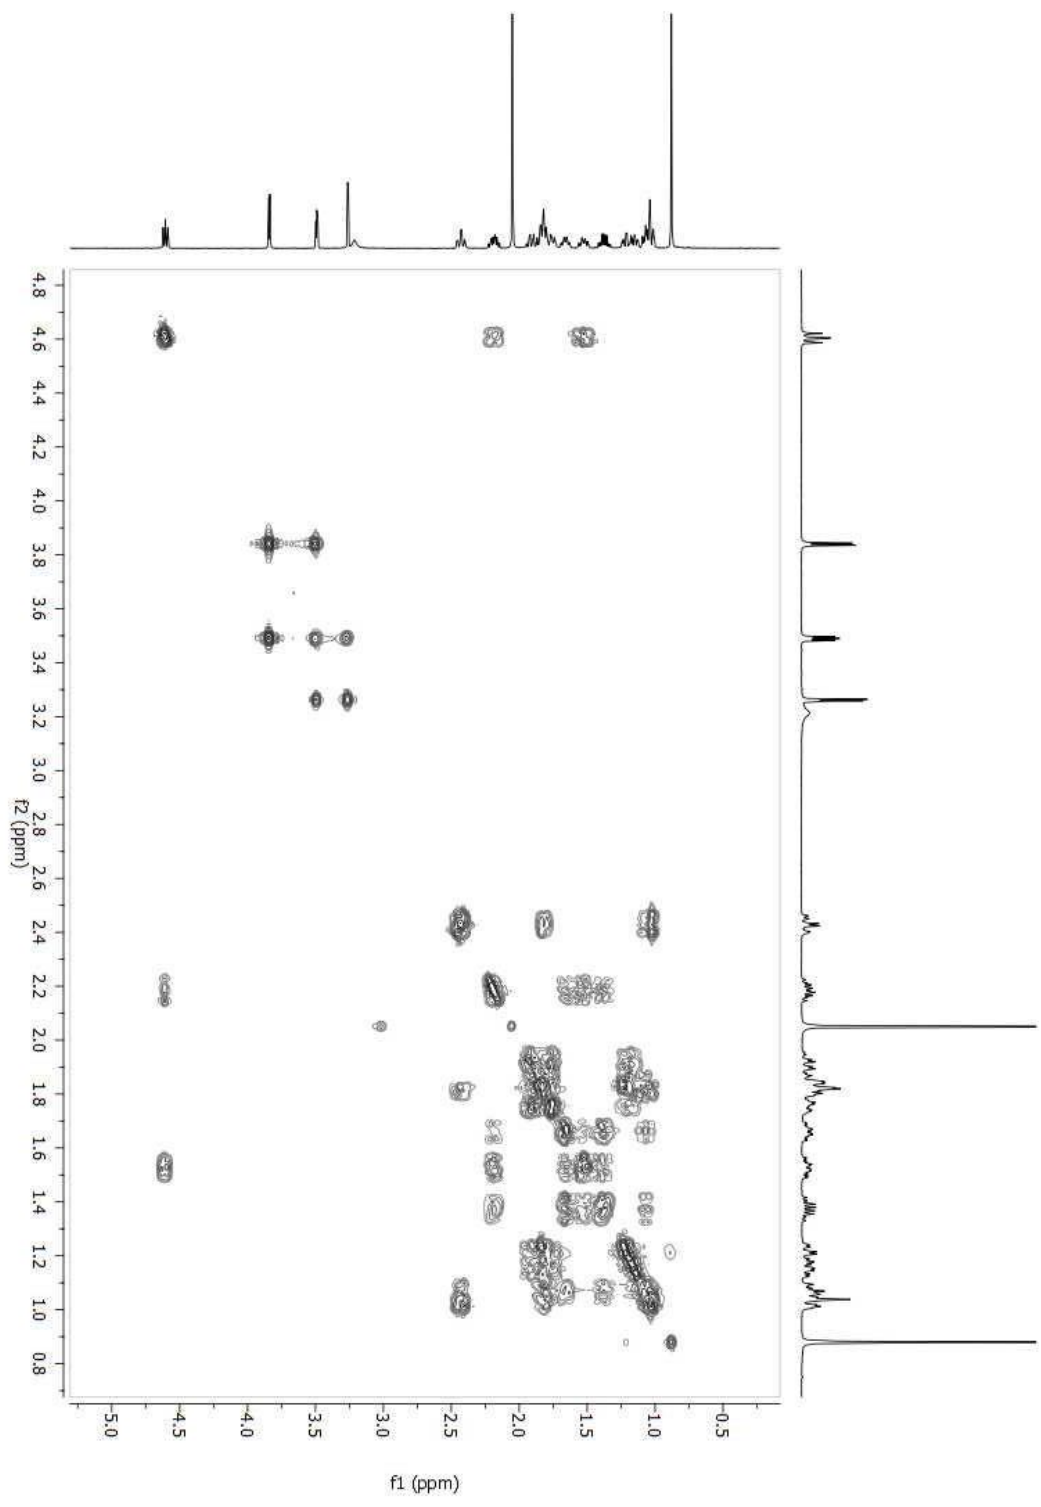

COSY spectrum of compound **4c**(CDCl<sub>3</sub>)



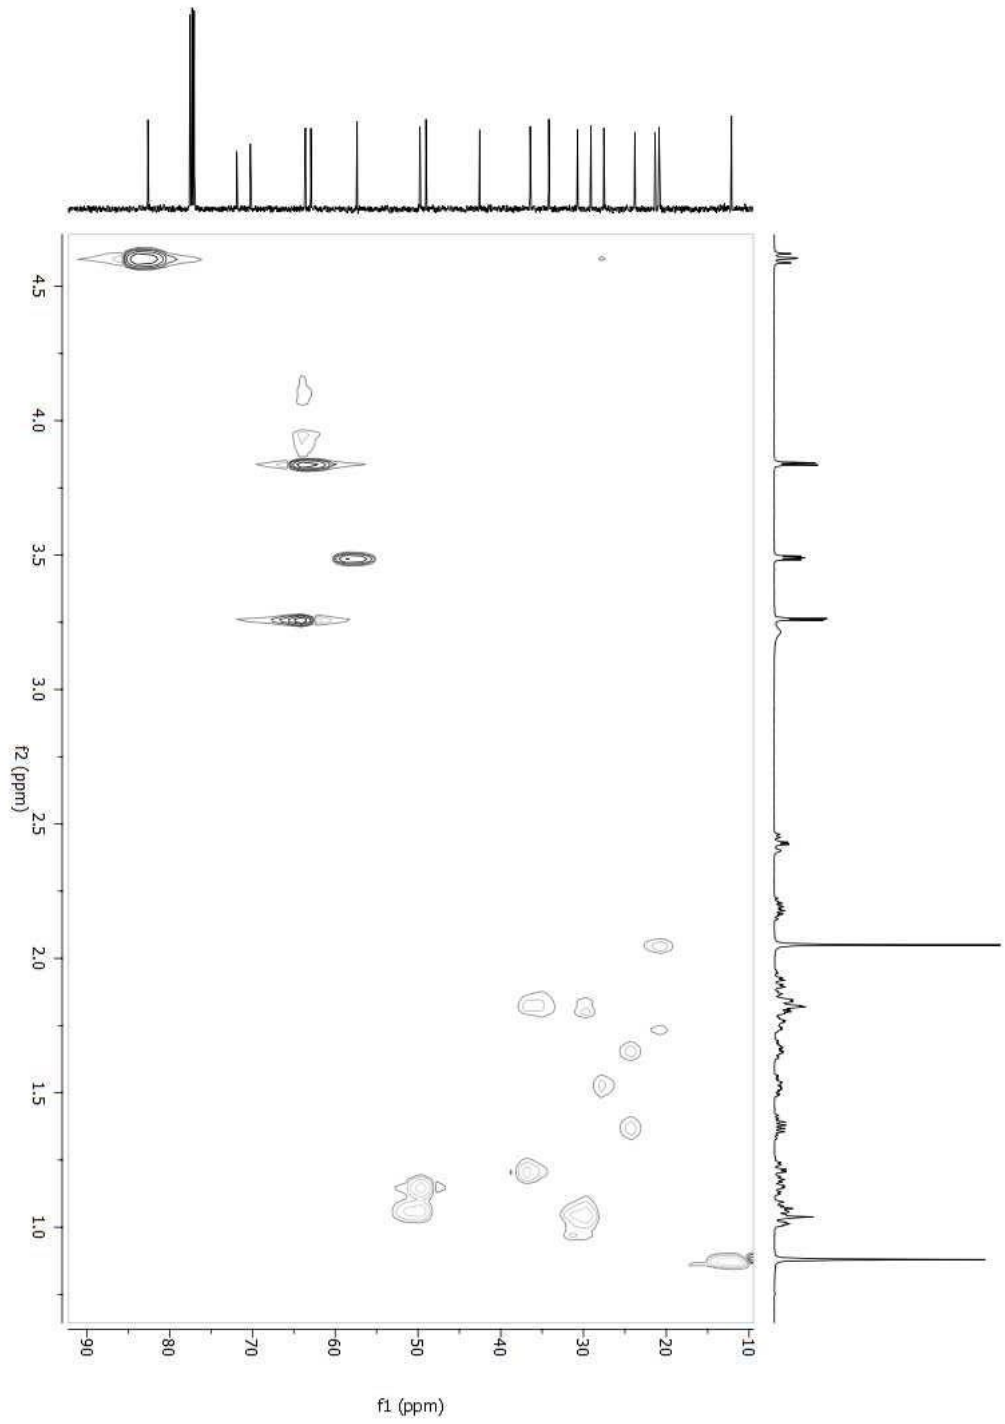

HSQC spectrum of compound **4c** ( $\text{CDCl}_3$ )

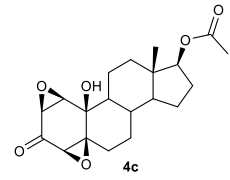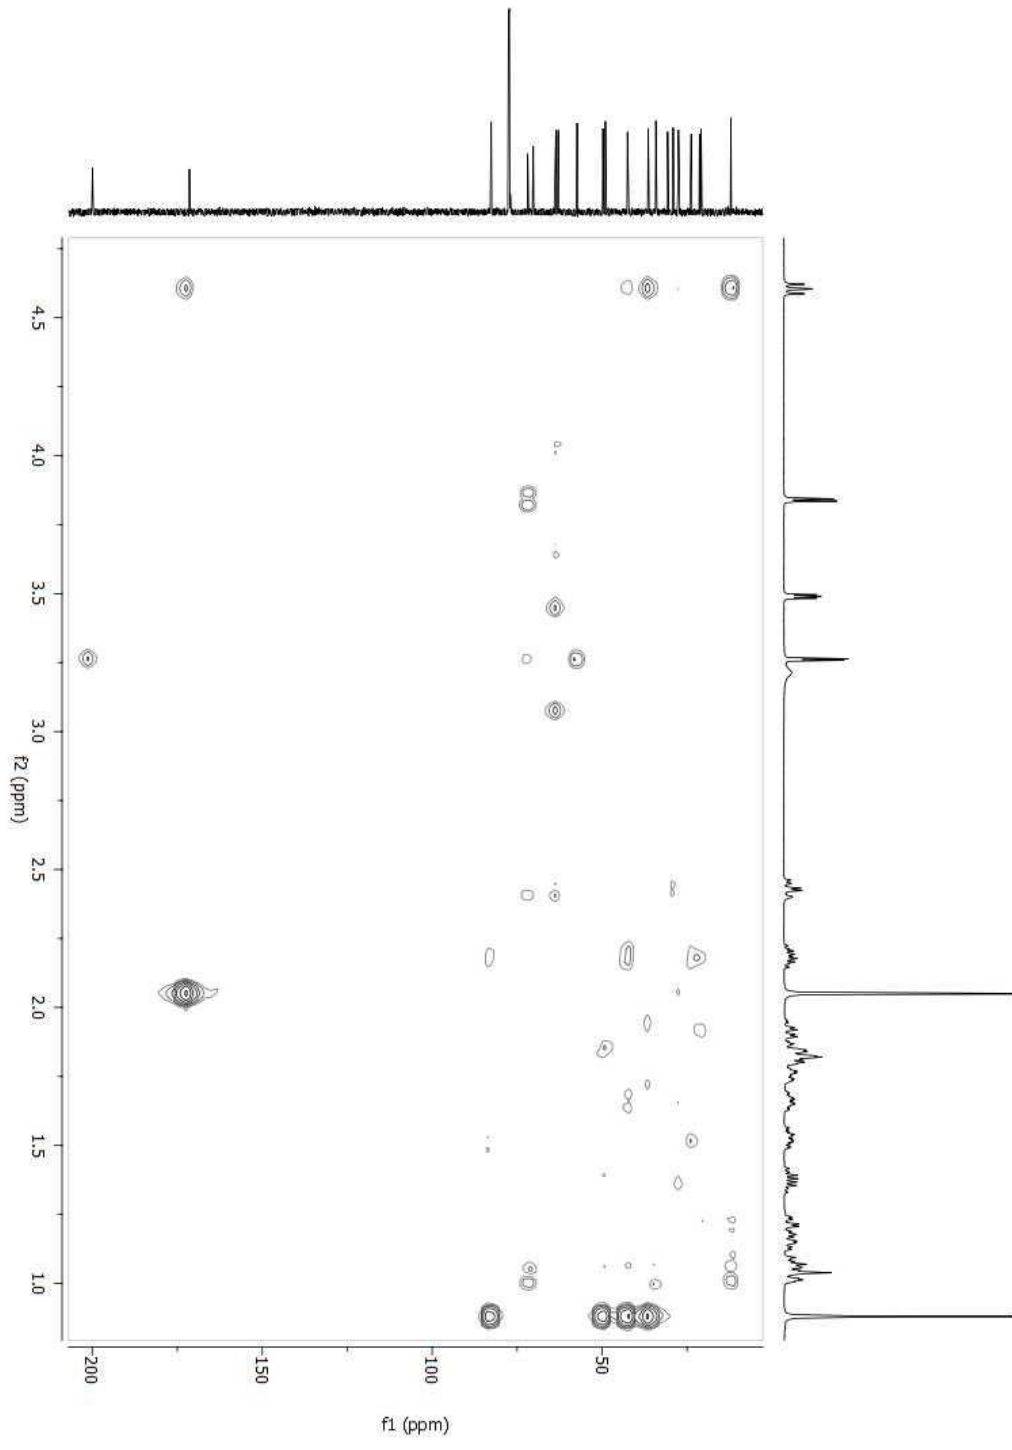

HMBC spectrum of compound **4c**(CDCl<sub>3</sub>)

3.10. Spectra of compound **4d**

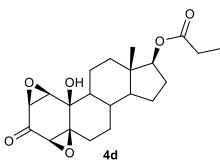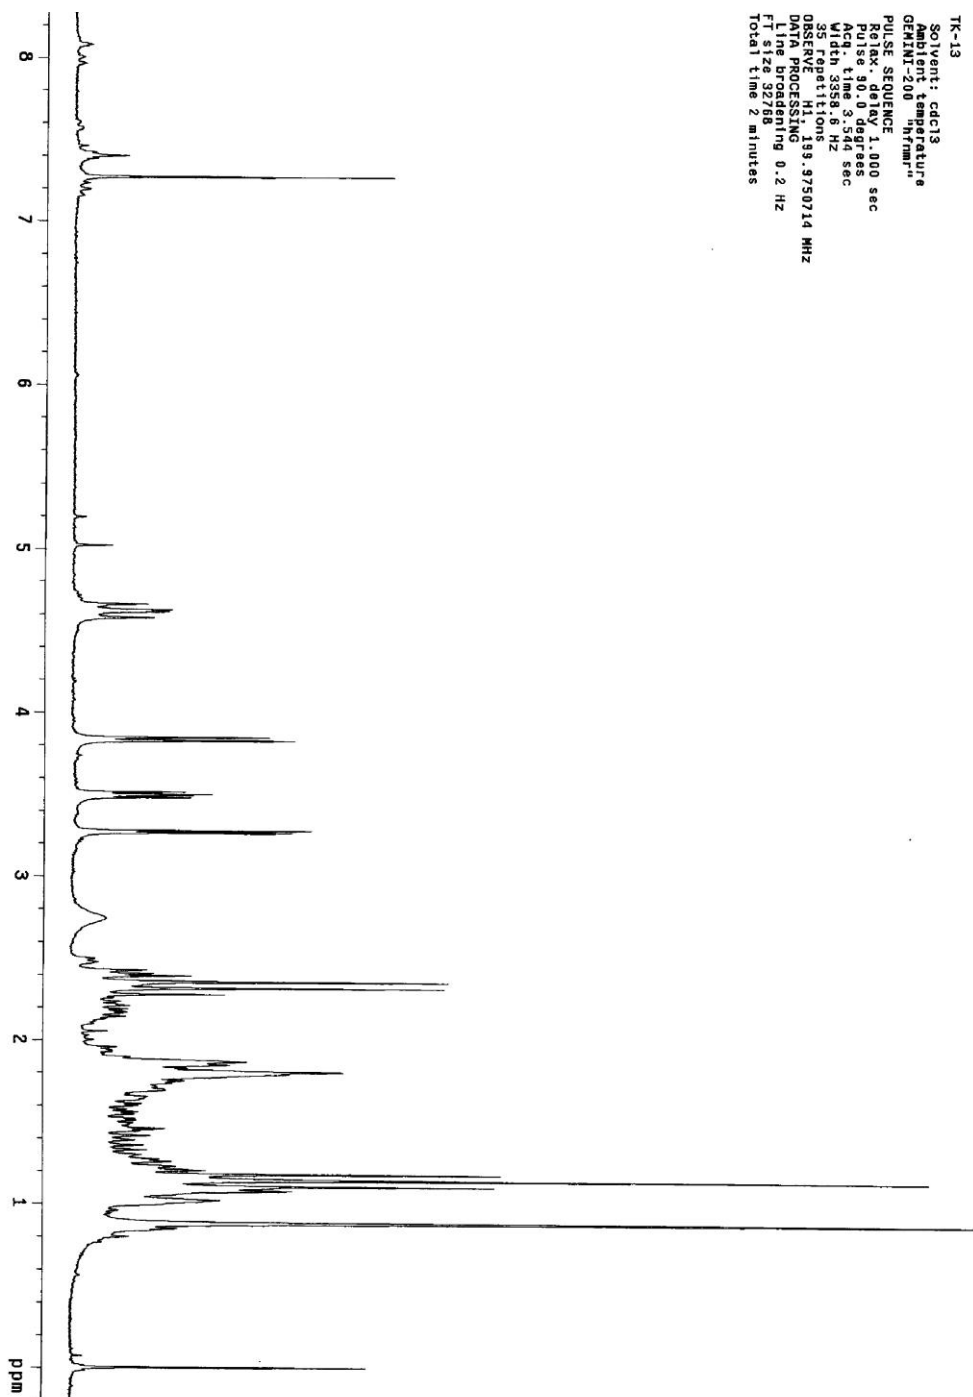

TK-13  
Solvent: cdcl3  
Ambient temperature  
GENIUS-200 N/Trmm  
PULSE SEQUENCE  
Pulse delay 1.000 sec  
Pulse 90  
Acq. time 3.547 sec  
Width 3358.6 Hz  
35 Repetitions  
OBSERVE H1, 139.9750714 MHz  
DATA PROCESSING  
F1 size 32768  
Total time 2 minutes

$^1\text{H}$  NMR spectrum of compound **4d** (200 MHz,  $\text{CDCl}_3$ )

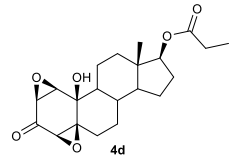

TK-13  
 Solvent: cdcl3  
 Ambient temperature  
 GEMINI-200 1H/13C  
 PULSE SEQUENCE  
 Relax: 9.000 sec  
 Acq. time 1.087 sec  
 Width 15000.0 Hz  
 2000.0 repetitions  
 OBSERVE C13, 50.293798 MHz  
 OBSERVE 1H, 199.973798 MHz  
 Power: 0 dB  
 continuously on  
 WALTZ-16 modulated  
 DATA PROCESSING  
 F1 ref. processing 2.0 Hz  
 Total time 102 minutes

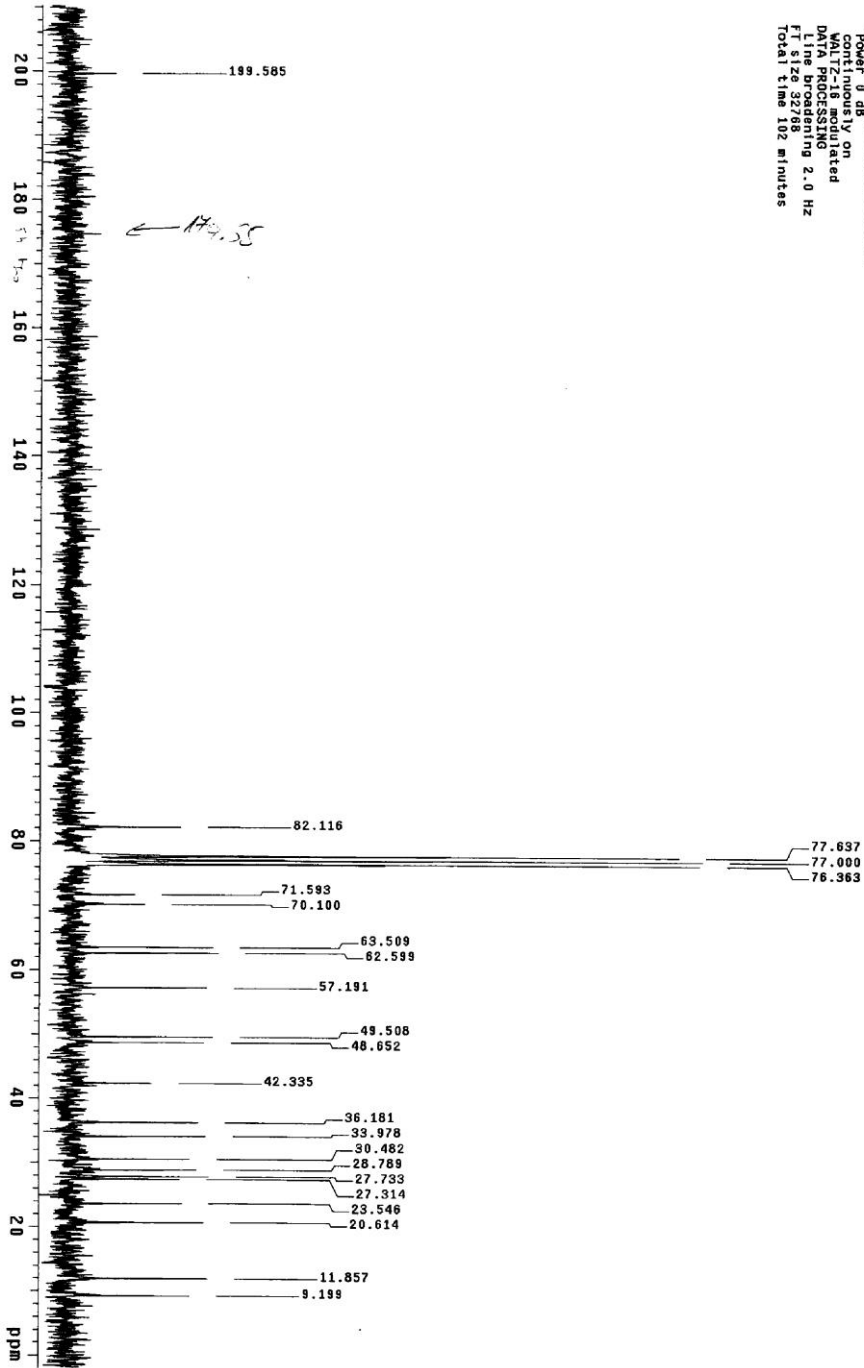

<sup>13</sup>C NMR spectrum of compound 4d (50 MHz, CDCl<sub>3</sub>)

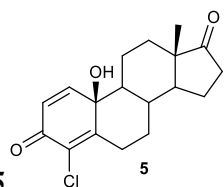

### 3.11. Spectra of compound **5**

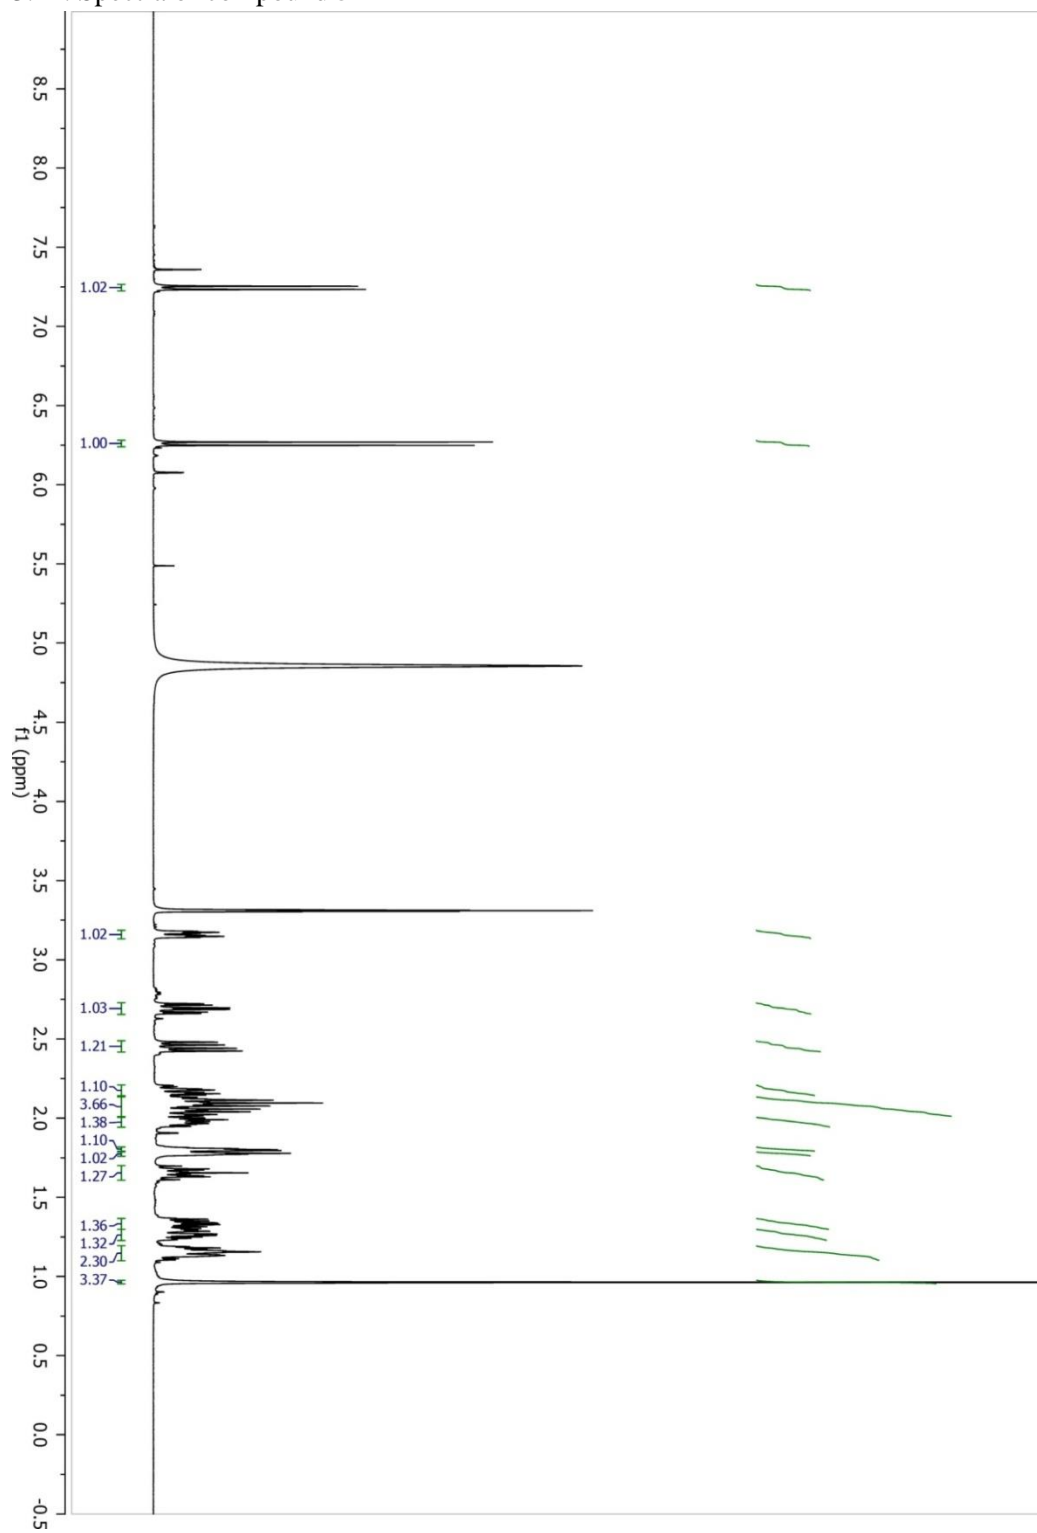

$^1\text{H}$  NMR spectrum of compound **5** (500 MHz, Methanol- $d_4$ )

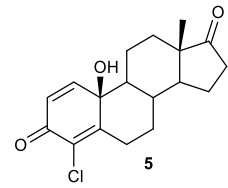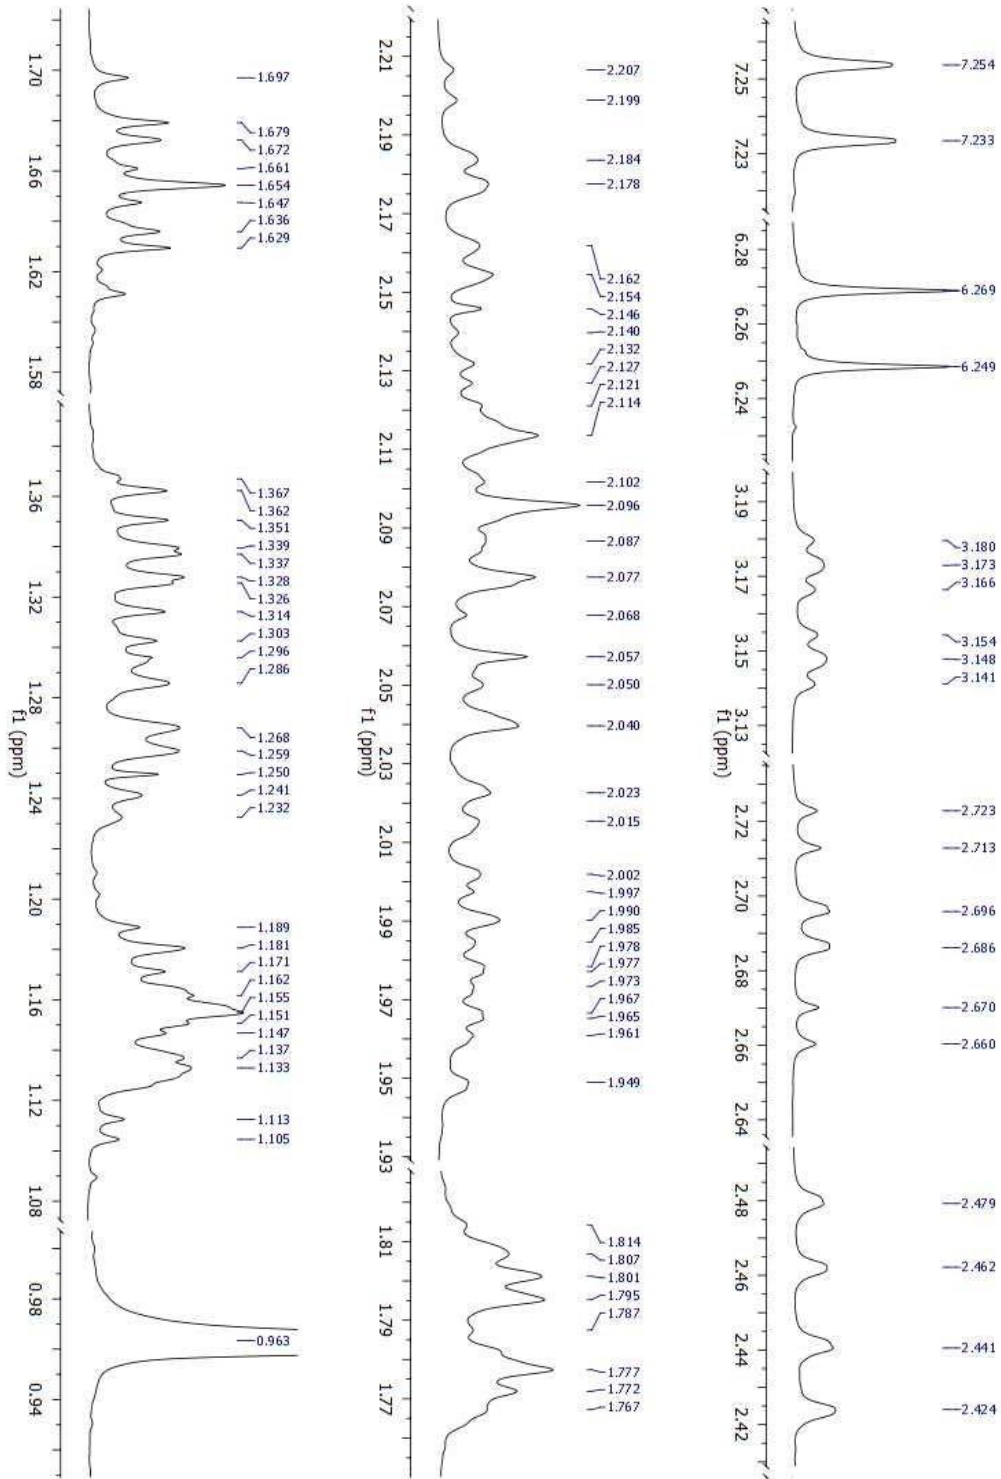

$^1\text{H}$  NMR spectrum of compound **5** (500 MHz, Methanol- $d_4$ )

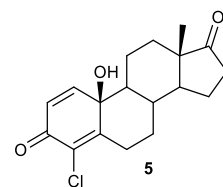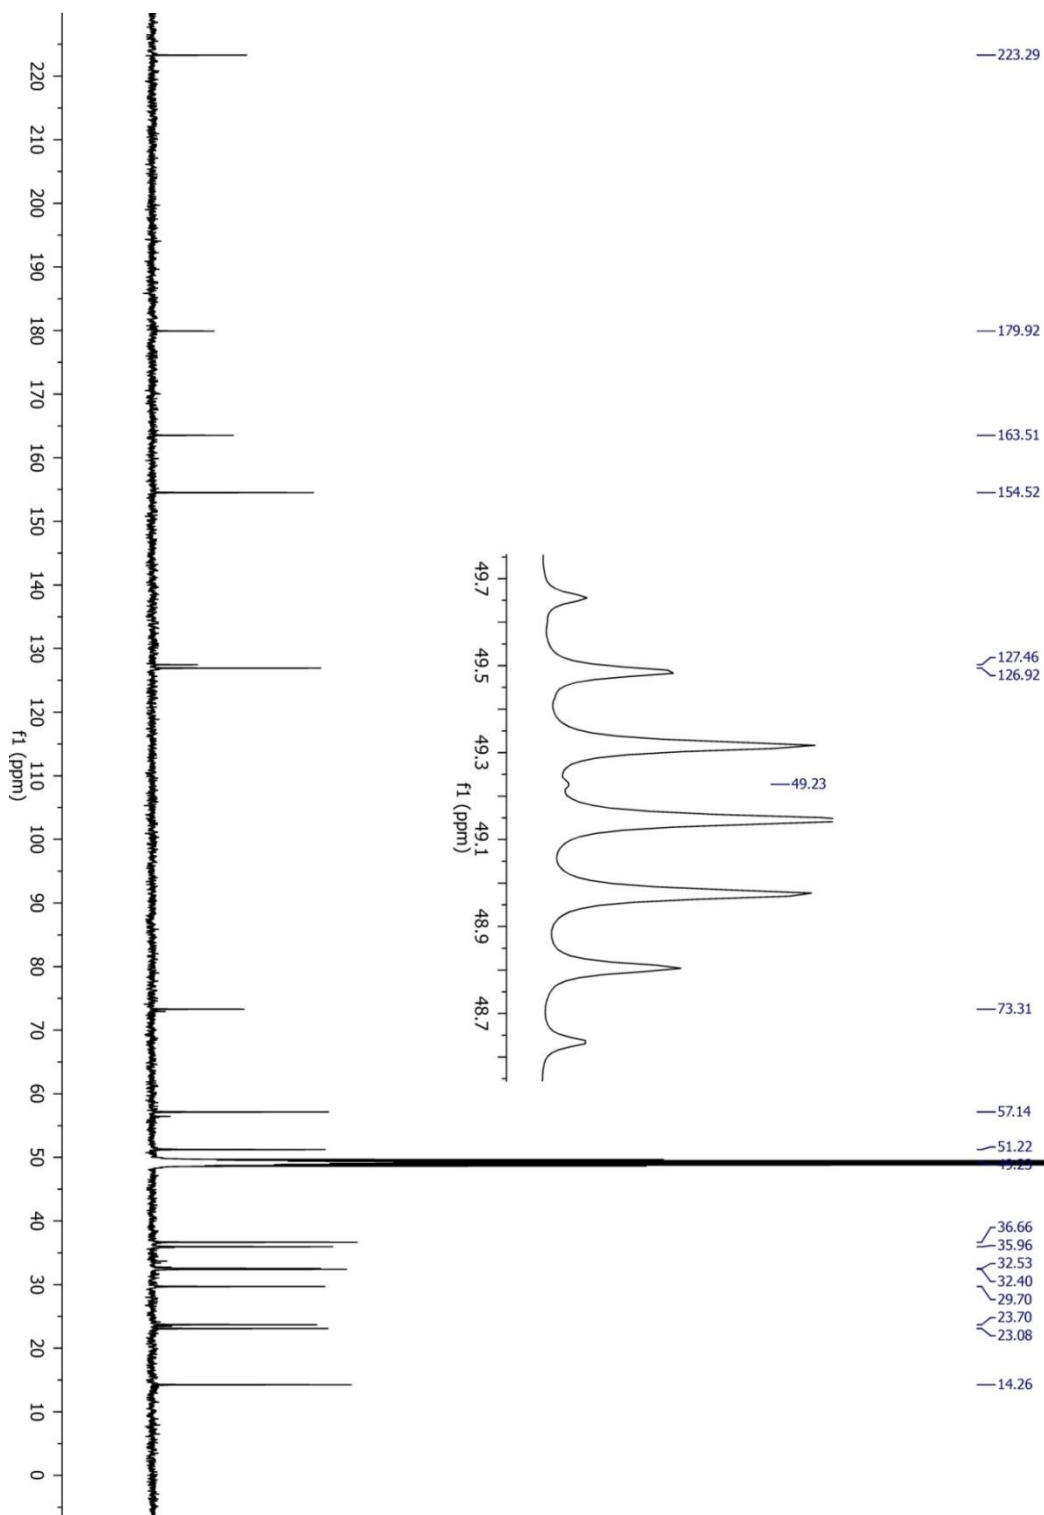

$^{13}\text{C}$  NMR spectrum of compound 5 (125 MHz, Methanol- $d_4$ )

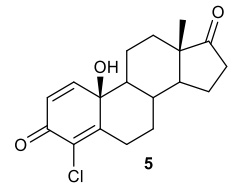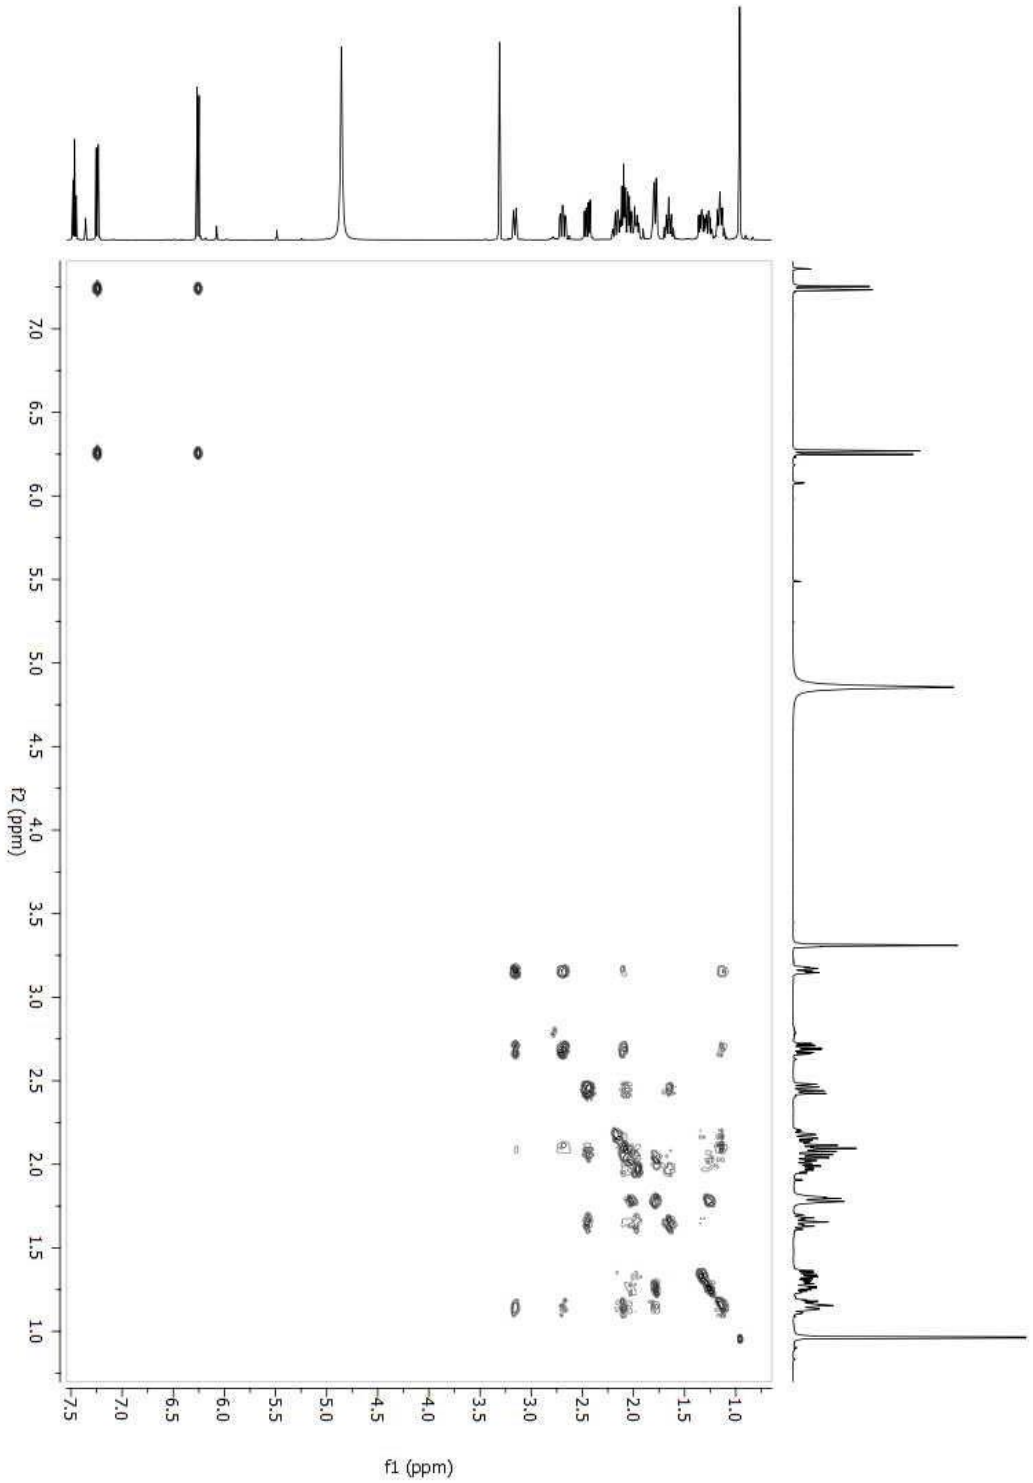

COSY spectrum of compound 5(Methanol-*d*<sub>4</sub>)



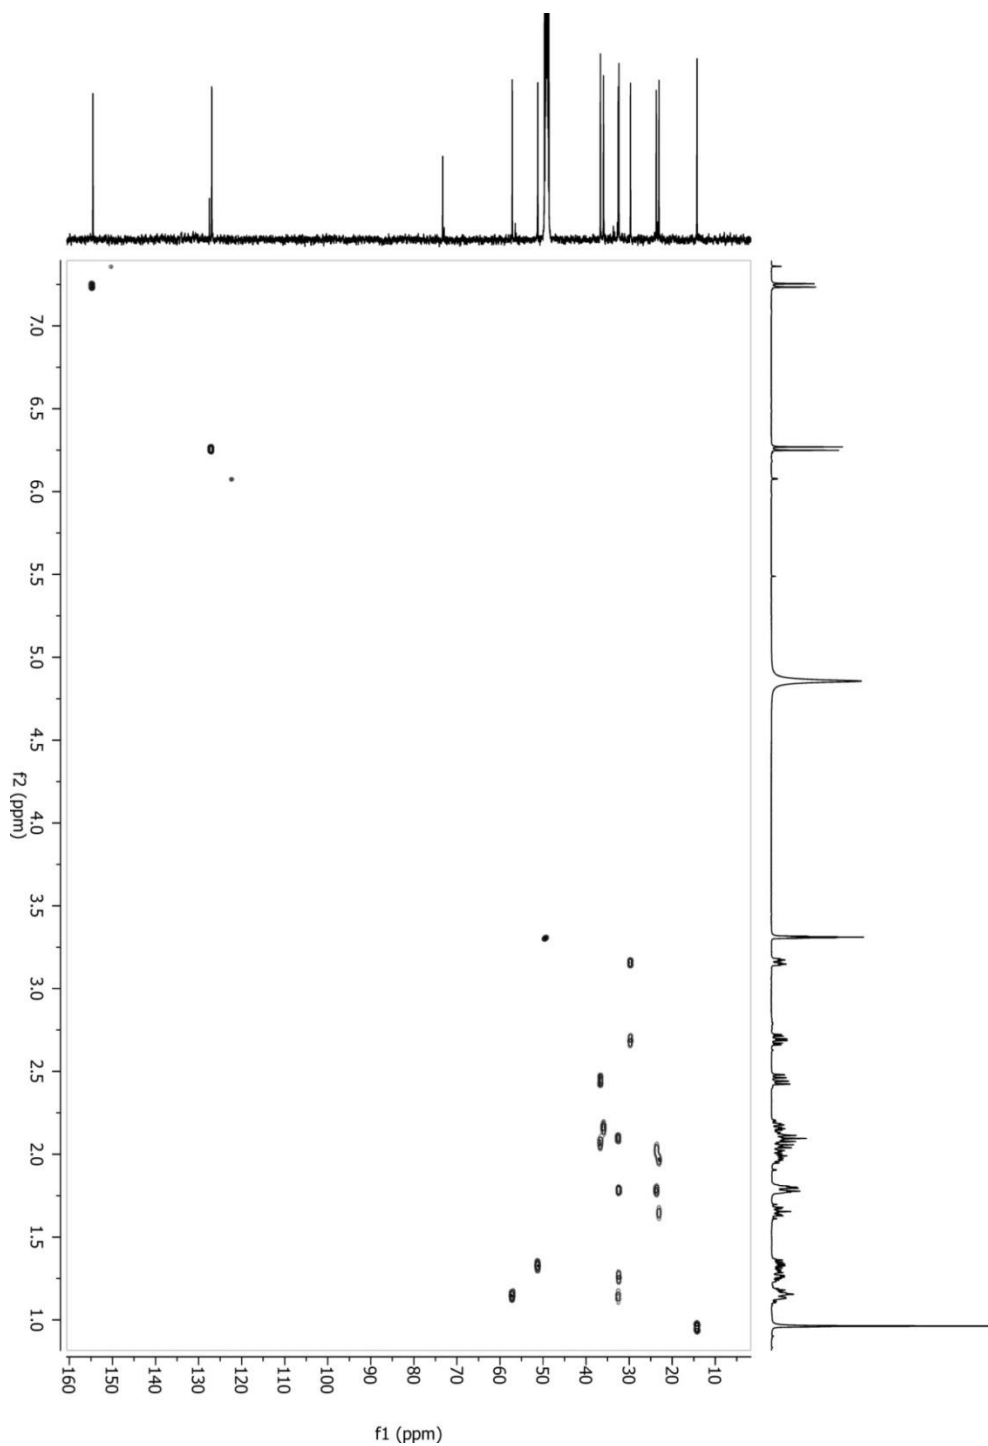

HSQC spectrum of compound 5 (Methanol- $d_4$ )

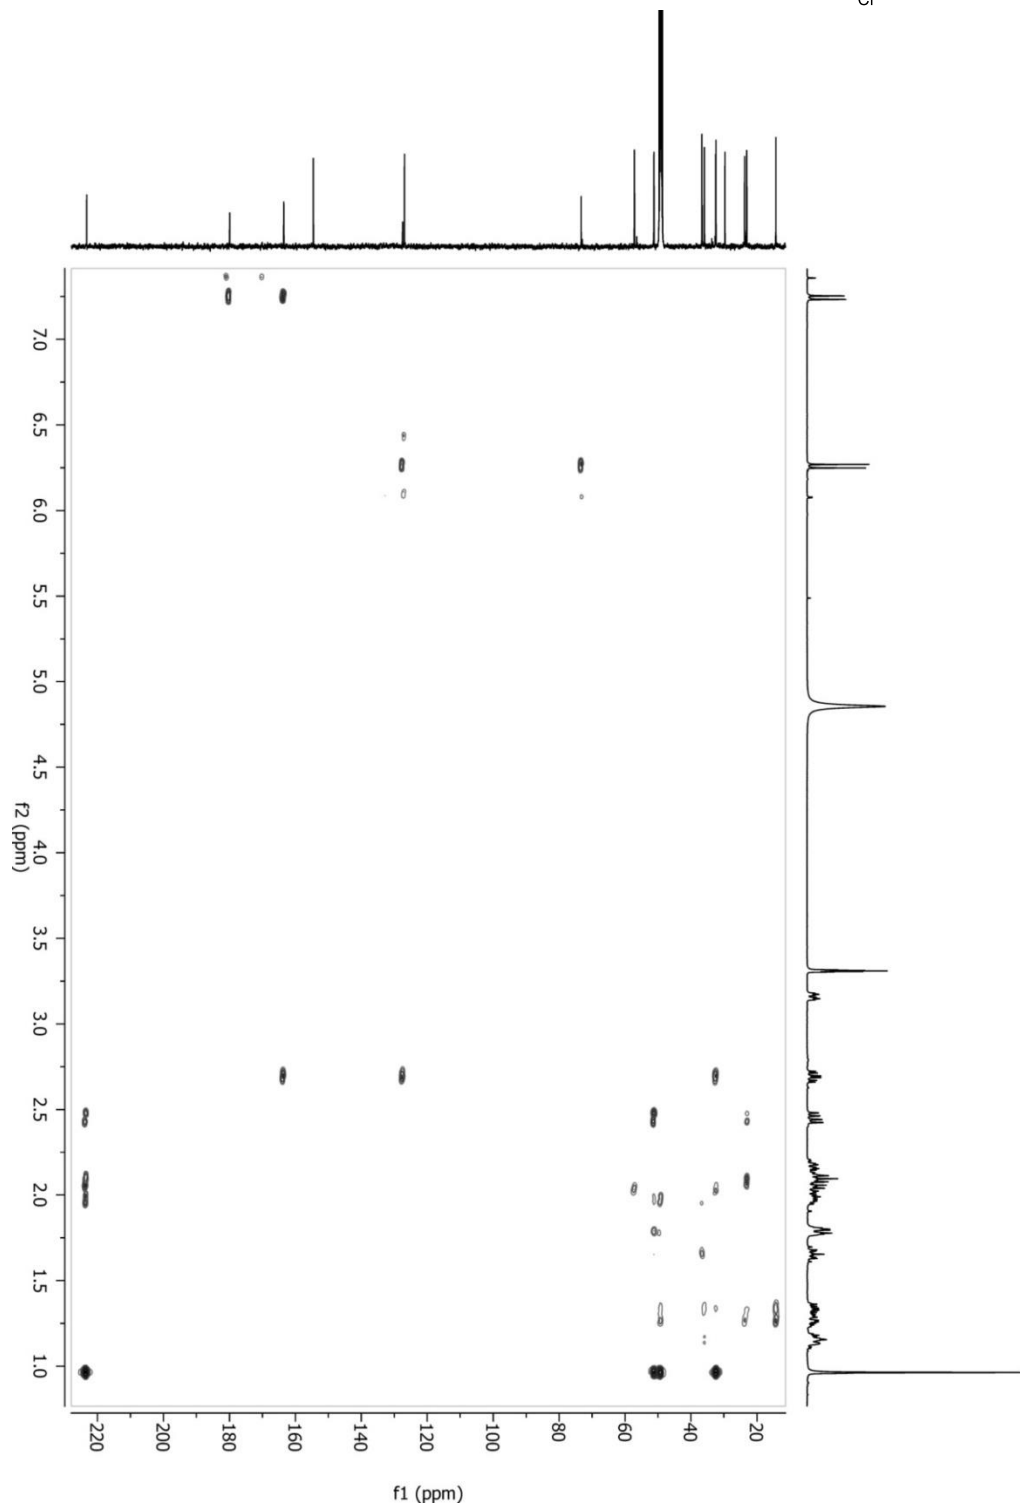

HMBC spectrum of compound **5**(Methanol- $d_4$ )

3.12. Spectra of compound **6**

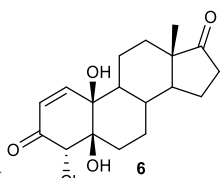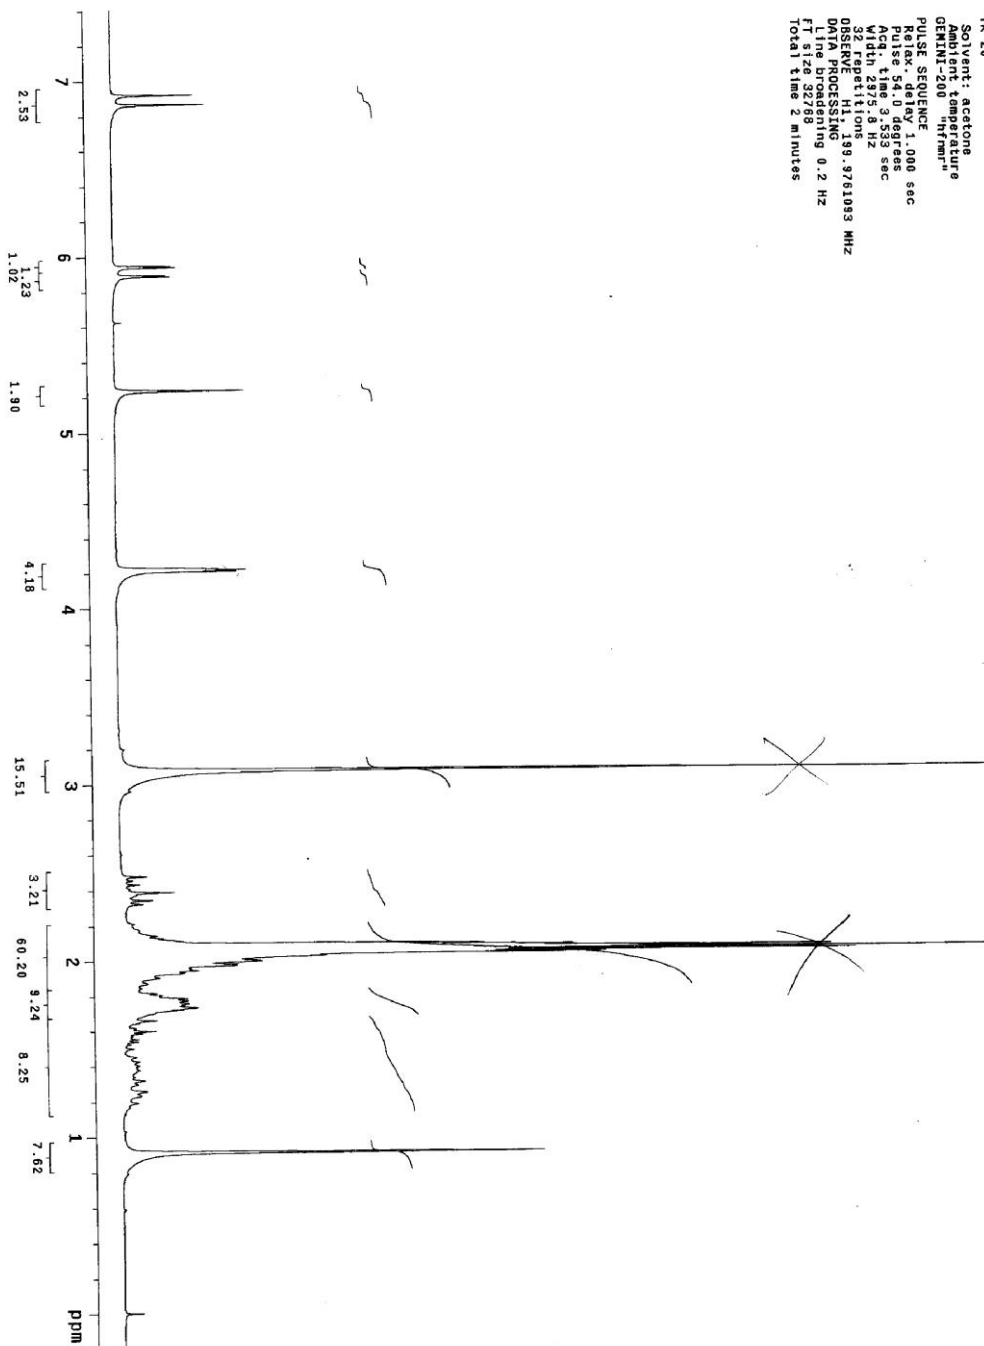

TK-20  
 Solvent: acetone  
 Acquisition Temperature  
 GEMINI-200 "hfrnm"  
 PULSE SEQUENCE  
 Relax. delay 1.000 sec  
 Pulse 54.0 degrees  
 Acq. time 3.533 sec  
 v/dln 2317.0 Hz  
 OBSERVE H1 189.9761033 MHz  
 DATA PROCESSING  
 Line broadening 0.2 Hz  
 F1 size 32799  
 Total time 2 minutes

<sup>1</sup>H NMR spectrum of compound **6** (200 MHz, Acetone-*d*<sub>6</sub>)

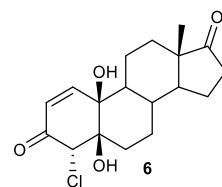

TK-20  
 Solvent: cdcl3  
 Acquisition temperature  
 GEMINI-200 "hnmr"  
 PULSE SEQUENCE: dept  
 Relaxation delay: 2.000 sec  
 Pulse delay: 1.500 sec  
 Acq. time: 1.500 sec  
 Width: 15000.0 Hz  
 256 repetitions  
 OBSERVE CH: 139.8754738 MHz  
 OBSERVE CH: 139.8754738 MHz  
 Power: 0 dB  
 on during acquisition  
 off during delay  
 Total time 51 minutes

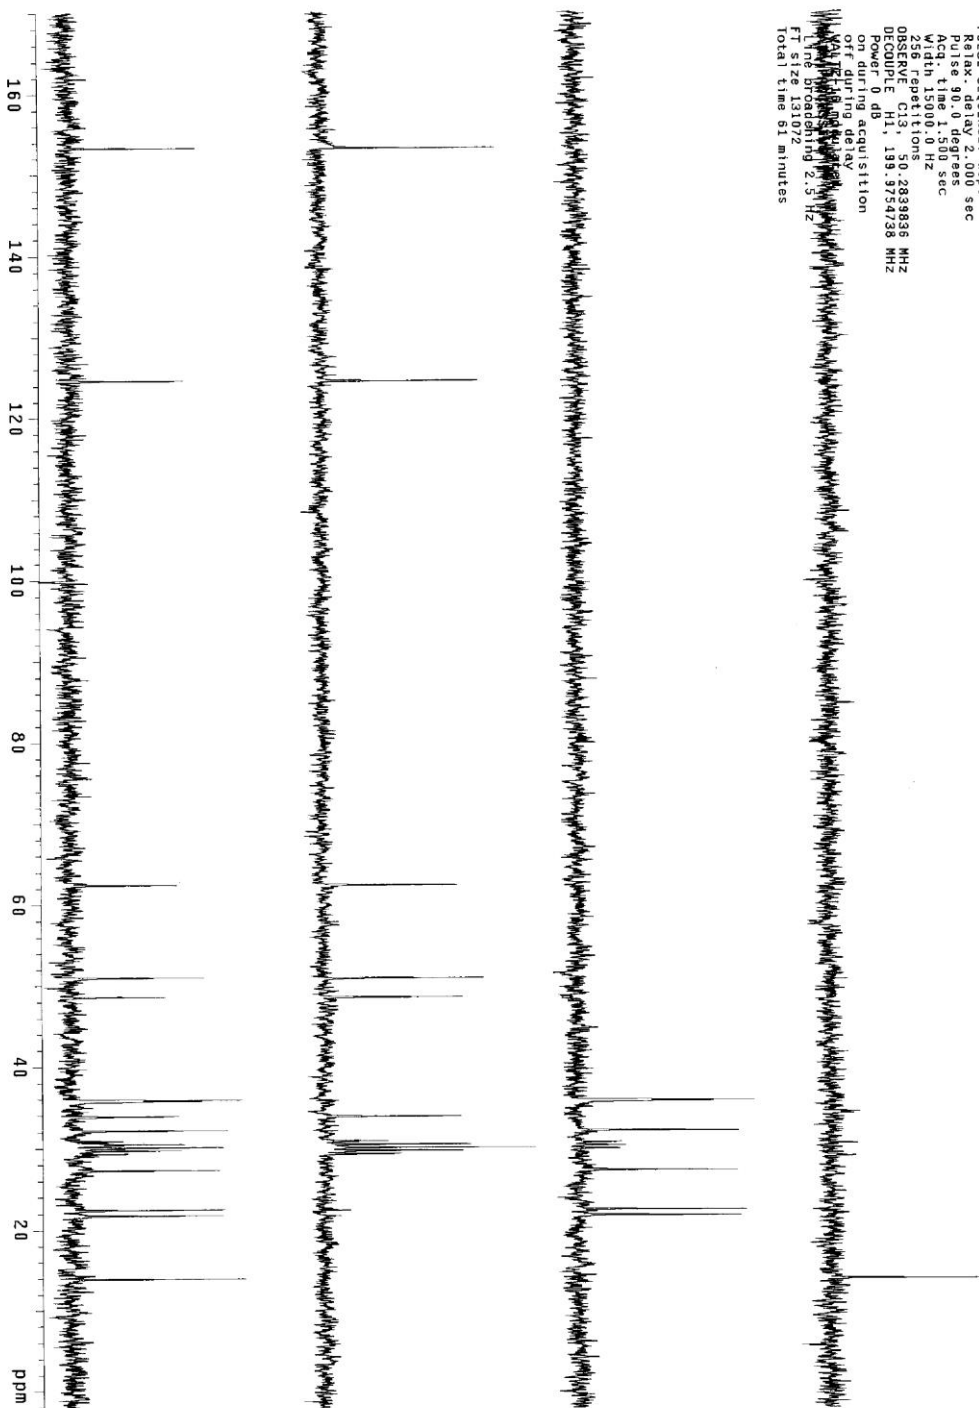

DEPT spectrum of compound 6(50 MHz, Acetone- $d_6$ )
